# Supplementary material for: Better integration of chemical pollution research will further our understanding of biodiversity loss
Source: Springer Nature journal article supplement (doi:10.1038/s41559-023-02117-6), 2023-06-29
Supplement: MOESM2 [file 41559_2023_2117_MOESM2_ESM.xlsx]

## Sheet: Sheet1
Driver/topic	Authors	Year	Title	On intended topic (yes=1, no (mishit)=0)	Source title	Volume	Issue	Art. No.	Page start	Page end	Page count	Cited by	DOI	Link	Document Type	Publication Stage	Open Access	Source	EID	Author(s) ID
chem	Chen, J., Han, T., Feng, X., Wang, B., Wang, G.	2019	A poly(thymine)-templated fluorescent copper nanoparticle hydrogel-based visual and portable strategy for an organophosphorus pesticide assay	1	Analyst	144	7		2423	2429		11	10.1039/c9an00017h	https://www.scopus.com/inward/record.url?eid=2-s2.0-85063447207&partnerID=40&md5=581a9660e0b89b90939776d046ca4b36	Article	Final		Scopus	2-s2.0-85063447207	57207997787; 57207146275; 57208235090; 36011135600; 35109724200
chem	van der Meulen, A., Chauhan, B.S.	2017	A review of weed management in wheat using crop competition	1	Crop Protection	95			38	44		46	10.1016/j.cropro.2016.08.004	https://www.scopus.com/inward/record.url?eid=2-s2.0-84995426626&partnerID=40&md5=f5cf5496db8aeaa72c16d3b18a5dcc35	Article	Final		Scopus	2-s2.0-84995426626	23006941400; 57212571537
chem	McQueen, A.D., Kinley, C.M., Hendrikse, M., Gaspari, D.P., Calomeni, A.J., Iwinski, K.J., Castle, J.W., Haakensen, M.C., Peru, K.M., Headley, J.V., Rodgers, J.H.	2017	A risk-based approach for identifying constituents of concern in oil sands process-affected water from the Athabasca Oil Sands region	1	Chemosphere	173			340	350		32	10.1016/j.chemosphere.2017.01.072	https://www.scopus.com/inward/record.url?eid=2-s2.0-85010002486&partnerID=40&md5=6e99e1aff56d44761f090645a2a0b826	Article	Final		Scopus	2-s2.0-85010002486	7006190310; 56429024200; 57193004944; 57190293259; 56404539300; 56545792600; 57202909302; 24070363300; 6601985564; 7005733957; 7202910931
chem	Ma, J.-M., Cai, L.-L., Zhang, B.-J., Hu, L.-W., Li, X.-Y., Wang, J.-J.	2010	Acute toxicity and effects of 1-alkyl-3-methylimidazolium bromide ionic liquids on green algae	1	Ecotoxicology and Environmental Safety	73	6		1465	1469		89	10.1016/j.ecoenv.2009.10.004	https://www.scopus.com/inward/record.url?eid=2-s2.0-77956189523&partnerID=40&md5=23e5e4de395fa383b08adb426a152ca5	Article	Final		Scopus	2-s2.0-77956189523	57199108295; 37025701100; 56171078500; 37026168300; 56339077600; 55904673200
chem	Jeremiason, J.D., Reiser, T.K., Weitz, R.A., Berndt, M.E., Aiken, G.R.	2016	Aeshnid dragonfly larvae as bioindicators of methylmercury contamination in aquatic systems impacted by elevated sulfate loading	1	Ecotoxicology	25	3		456	468		18	10.1007/s10646-015-1603-9	https://www.scopus.com/inward/record.url?eid=2-s2.0-84953266008&partnerID=40&md5=cb4126dcaade9b4b3c93b1546dbeb807	Article	Final		Scopus	2-s2.0-84953266008	6602234005; 57038784300; 57038404400; 7102909848; 57207563153
chem	Gallé, T., Pittois, D., Bayerle, M., Braun, C.	2019	An immission perspective of emerging micropollutant pressure in Luxembourgish surface waters: A simple evaluation scheme for wastewater impact assessment	1	Environmental Pollution	253			992	999		5	10.1016/j.envpol.2019.07.080	https://www.scopus.com/inward/record.url?eid=2-s2.0-85069656848&partnerID=40&md5=e5f8f5ab6c9173d4ffcdc97bf6962201	Article	Final		Scopus	2-s2.0-85069656848	56044622700; 55317971000; 52263243000; 57197604912
chem	Lehnert, K., Weirup, L., Harding, K.C., Härkönen, T., Karlsson, O., Teilmann, J.	2017	Antarctic seals: Molecular biomarkers as indicators for pollutant exposure, health effects and diet	1	Science of the Total Environment	599-600			1693	1704		8	10.1016/j.scitotenv.2017.04.224	https://www.scopus.com/inward/record.url?eid=2-s2.0-85019959001&partnerID=40&md5=1f9e41c6ede2652705bd1554680967a8	Article	Final		Scopus	2-s2.0-85019959001	8611550700; 55844559500; 7103018424; 6603713511; 35740668800; 6603240236
chem	Al-Odaini, N.A., Zakaria, M.P., Zali, M.A., Juahir, H., Yaziz, M.I., Surif, S.	2012	Application of chemometrics in understanding the spatial distribution of human pharmaceuticals in surface water	1	Environmental Monitoring and Assessment	184	11		6735	6748		36	10.1007/s10661-011-2454-3	https://www.scopus.com/inward/record.url?eid=2-s2.0-84867571196&partnerID=40&md5=fa98244338f3834ecef98ebcb84d715f	Article	Final		Scopus	2-s2.0-84867571196	36473070400; 7006065295; 55335368300; 35186223500; 6602429317; 35612711900
chem	Marijić, V.F., Perić, M.S., Kepčija, R.M., Dragun, Z., Kovarik, I., Gulin, V., Erk, M.	2016	Assessment of metal exposure, ecological status and required water quality monitoring strategies in small- to medium-size temperate rivers	1	Journal of Environmental Science and Health - Part A Toxic/Hazardous Substances and Environmental Engineering	51	4		309	317		7	10.1080/10934529.2015.1109393	https://www.scopus.com/inward/record.url?eid=2-s2.0-84956748070&partnerID=40&md5=b555717d2249e258a9bcb89ccdc8530f	Article	Final		Scopus	2-s2.0-84956748070	55551242500; 36572113900; 9735866000; 6506137602; 57044707300; 57044603300; 55891522400
chem	Amir, R.M., Kausar, R., Ahmad, A., Khan, M.A., Nadeem, M., Faiz, F., Shahzad, A., Imran, M., Azam, M.T., Khan, M.A., Abubakar, S.	2017	Assessment of pesticide residues in cauliflower and associated health implication	1	Sylwan	161	9		170	179		3		https://www.scopus.com/inward/record.url?eid=2-s2.0-85041726722&partnerID=40&md5=86b90b82643423f9c334546ea5c21aa5	Article	Final		Scopus	2-s2.0-85041726722	39261121900; 57209013750; 55249568800; 57203292567; 57220518054; 57200163472; 36560321700; 57482879400; 57618396800; 55378170300; 57197905696
chem	Hussein, A.H.A., El Mahmoudi, A.S., Al Naeem, A.A.	2016	Assessment of the heavy metals in Al Asfar Lake, Al-Hassa, Saudi Arabia	1	Water Environment Research	88	2		142	151		3	10.2175/106143015X14362865227913a	https://www.scopus.com/inward/record.url?eid=2-s2.0-84957795297&partnerID=40&md5=8363a691ecee3064c6ae994dfb0d2fc5	Article	Final		Scopus	2-s2.0-84957795297	7201716360; 35188966600; 36963392500
chem	Zittel, R., da Silva, C.P., Domingues, C.E., Seremeta, D.C.H., da Cunha, K.M., de Campos, S.X.	2020	Availability of nutrients, removal of nicotine, heavy metals and pathogens in compounds obtained from smuggled cigarette tobacco compost associated with industrial sewage sludge	1	Science of the Total Environment	699		134377				11	10.1016/j.scitotenv.2019.134377	https://www.scopus.com/inward/record.url?eid=2-s2.0-85074163678&partnerID=40&md5=1177f9e5e07b354479dcf5480a3ee63a	Article	Final		Scopus	2-s2.0-85074163678	56436181800; 56426758200; 57191916246; 57044703900; 57211493836; 6506223968
chem	Sladek, B., Burger, L., Munn, I.	2008	Avian community response to midrotation herbicide release and prescribed burning in Conservation Reserve Program plantations	1	Southern Journal of Applied Forestry	32	3		111	119		13	10.1093/sjaf/32.3.111	https://www.scopus.com/inward/record.url?eid=2-s2.0-50849125790&partnerID=40&md5=d8a79dcf9fec997d440dd4d5e41dccdf	Article	Final	All Open Access, Bronze	Scopus	2-s2.0-50849125790	24759724100; 57200583221; 6701649809
chem	Nicolás Lazarte, J., Lopez, R.P., Daniel Ghiringhelli, P., Berón, C.M.	2018	Bacillus wiedmannii biovar thuringiensis: A Specialized Mosquitocidal Pathogen with Plasmids from Diverse Origins	0	Genome Biology and Evolution	10	10		2823	2833		12	10.1093/gbe/evy211	https://www.scopus.com/inward/record.url?eid=2-s2.0-85055613522&partnerID=40&md5=388bfb1cdf4e904a7bf6074ce776810b	Article	Final	All Open Access, Gold, Green	Scopus	2-s2.0-85055613522	57207822597; 57204446198; 57207819507; 6508155728
chem	San-Valero, P., Dorado, A.D., Quijano, G., Álvarez-Hornos, F.J., Gabaldón, C.	2018	Biotrickling filter modeling for styrene abatement. Part 2: Simulating a two-phase partitioning bioreactor	0	Chemosphere	191			1075	1082		11	10.1016/j.chemosphere.2017.10.141	https://www.scopus.com/inward/record.url?eid=2-s2.0-85032727530&partnerID=40&md5=c151cabd1b3dc99a6cf565d14757d199	Article	Final	All Open Access, Green	Scopus	2-s2.0-85032727530	37050384000; 24314731100; 29867444700; 12767880900; 6701436092
chem	Espigares, M., Coca, C., Fernandez-Crehuet, M., Moreno, O., Galvez, R.	1996	Chemical and microbiologic indicators of faecal contamination in the Guadalquivir (Spain)	1	European Water Pollution Control	6	3		[d]7	13		7		https://www.scopus.com/inward/record.url?eid=2-s2.0-0030145408&partnerID=40&md5=41f8c478b5e3b88014cffd5cfaa04d15	Article	Final		Scopus	2-s2.0-0030145408	6603813654; 6602850903; 6602364389; 7006726215; 12762862300
chem	Dussourd, D.E.	2003	Chemical stimulants of leaf-trenching by cabbage loopers: Natural products, neurotransmitters, insecticides, and drugs	0	Journal of Chemical Ecology	29	9		2023	2047		35	10.1023/A:1025630301162	https://www.scopus.com/inward/record.url?eid=2-s2.0-0141455300&partnerID=40&md5=b8e24716d1e01af65c615e979e760b61	Article	Final		Scopus	2-s2.0-0141455300	6602819321
chem	Sivagami, K., Vikraman, B., Krishna, R.R., Swaminathan, T.	2016	Chlorpyrifos and Endosulfan degradation studies in an annular slurry photo reactor	1	Ecotoxicology and Environmental Safety	134			327	331		35	10.1016/j.ecoenv.2015.08.015	https://www.scopus.com/inward/record.url?eid=2-s2.0-84960830593&partnerID=40&md5=cf1c6e095a6ade3f9865275ac4834849	Article	Final		Scopus	2-s2.0-84960830593	56073609700; 57168865500; 56073587100; 9640131800
chem	Lee, A.H., Fraz, S., Purohit, U., Campos, A.R., Wilson, J.Y.	2020	Chronic exposure of Brown (Hydra oligactis) and green Hydra (Hydra viridissima) to environmentally relevant concentrations of pharmaceuticals	1	Science of the Total Environment	732		139232				3	10.1016/j.scitotenv.2020.139232	https://www.scopus.com/inward/record.url?eid=2-s2.0-85084549315&partnerID=40&md5=0b4e8170b6f3f8ffe7ae33eafe0556c7	Article	Final		Scopus	2-s2.0-85084549315	57145469700; 57200820238; 57216759500; 7202215069; 57203179740
chem	Tan, H., Polverino, G., Martin, J.M., Bertram, M.G., Wiles, S.C., Palacios, M.M., Bywater, C.L., White, C.R., Wong, B.B.M.	2020	Chronic exposure to a pervasive pharmaceutical pollutant erodes among-individual phenotypic variation in a fish	1	Environmental Pollution	263		114450				16	10.1016/j.envpol.2020.114450	https://www.scopus.com/inward/record.url?eid=2-s2.0-85082874079&partnerID=40&md5=46352cf62b39a712ea19f38a73544c37	Article	Final		Scopus	2-s2.0-85082874079	57211742025; 55305600900; 57192869896; 56572362500; 57216225931; 56183689800; 23979613600; 7404153052; 24464664000
chem	Giari, L., Vincenzi, F., Badini, S., Guerranti, C., Dezfuli, B.S., Fano, E.A., Castaldelli, G.	2016	Common carp Cyprinus carpio responses to sub-chronic exposure to perfluorooctanoic acid	1	Environmental Science and Pollution Research	23	15		15321	15330		14	10.1007/s11356-016-6706-1	https://www.scopus.com/inward/record.url?eid=2-s2.0-84964294671&partnerID=40&md5=b1640df5b1023e490774f9d82fe03d87	Article	Final		Scopus	2-s2.0-84964294671	6602844775; 7005432533; 57188932673; 24080319000; 7004308922; 6701802296; 6506146259
chem	Al-Hashim, M.H., El-Sorogy, A.S., Al Qaisi, S., Alharbi, T.	2021	Contamination and ecological risk of heavy metals in Al-Uqair coastal sediments, Saudi Arabia	1	Marine Pollution Bulletin	171		112748				1	10.1016/j.marpolbul.2021.112748	https://www.scopus.com/inward/record.url?eid=2-s2.0-85111270907&partnerID=40&md5=a21902475175f7c5ffb97bcccd3bbd7c	Article	Final		Scopus	2-s2.0-85111270907	57210151677; 6506484391; 57226353130; 57193706862
chem	Baran, A., Tarnawski, M., Koniarz, T., Szara, M.	2019	Content of nutrients, trace elements, and ecotoxicity of sediment cores from Rożnów reservoir (Southern Poland)	1	Environmental Geochemistry and Health	41	6		2929	2948		12	10.1007/s10653-019-00363-x	https://www.scopus.com/inward/record.url?eid=2-s2.0-85068805824&partnerID=40&md5=71d969cc5e1466801de9e05b01261cf5	Article	Final	All Open Access, Hybrid Gold, Green	Scopus	2-s2.0-85068805824	34871233300; 55892788300; 57190031466; 55520613100
chem	Meng, J., Wang, L., Zhong, L., Liu, X., Brookes, P.C., Xu, J., Chen, H.	2017	Contrasting effects of composting and pyrolysis on bioavailability and speciation of Cu and Zn in pig manure	1	Chemosphere	180			93	99		90	10.1016/j.chemosphere.2017.04.009	https://www.scopus.com/inward/record.url?eid=2-s2.0-85017173417&partnerID=40&md5=39b3e1031a5898a247c8de589f9d5f30	Article	Final		Scopus	2-s2.0-85017173417	55233746700; 57221649267; 57193852122; 8543886900; 7102556118; 36635031300; 57189360705
chem	Phoon, B.L., Ong, C.C., Mohamed Saheed, M.S., Show, P.-L., Chang, J.-S., Ling, T.C., Lam, S.S., Juan, J.C.	2020	Conventional and emerging technologies for removal of antibiotics from wastewater	1	Journal of Hazardous Materials	400		122961				119	10.1016/j.jhazmat.2020.122961	https://www.scopus.com/inward/record.url?eid=2-s2.0-85086936571&partnerID=40&md5=67859b87ed7754a5fc28a0a493e10d8c	Article	Final		Scopus	2-s2.0-85086936571	57195243283; 57202546629; 57211415541; 47861451300; 8567368700; 21739800800; 23035028500; 56068042700
chem	Dang, C., Sun, C., Lu, Z., Zhong, F., Wang, F., Wang, Q., Sun, R., Peng, Y., Ye, G.	2019	Cry2A rice did not affect the interspecific interactions between two rice planthoppers, Nilaparvata lugens, and Sogatella furcifera	1	GM Crops and Food	10	3		170	180		4	10.1080/21645698.2019.1649530	https://www.scopus.com/inward/record.url?eid=2-s2.0-85070274408&partnerID=40&md5=8cb9e145ff1979464196b97d7c87942b	Article	Final	All Open Access, Green	Scopus	2-s2.0-85070274408	57050112300; 57210314328; 55886606100; 57210311360; 57209993981; 57195242157; 57210317448; 7403418739; 7103331646
chem	Dennis Lemly, A.	2015	Damage cost of the Dan River coal ash spill	1	Environmental Pollution	197			55	61		32	10.1016/j.envpol.2014.11.027	https://www.scopus.com/inward/record.url?eid=2-s2.0-84922493669&partnerID=40&md5=89b3d01d0ca3d2befae4799bdc28d331	Article	Final		Scopus	2-s2.0-84922493669	7006843459
chem	Keiter, S., Peddinghaus, S., Feiler, U., von der Goltz, B., Hafner, C., Ho, N.Y., Rastegar, S., Otte, J.C., Ottermanns, R., Reifferscheid, G., Strähle, U., Braunbeck, T., Hammers-Wirtz, M., Hollert, H.	2010	DanTox-a novel joint research project using zebrafish (Danio rerio) to identify specific toxicity and molecular modes of action of sediment-bound pollutants	1	Journal of Soils and Sediments	10	4		714	717		18	10.1007/s11368-010-0221-7	https://www.scopus.com/inward/record.url?eid=2-s2.0-77956432881&partnerID=40&md5=6410f16c0027574a2372615edf160406	Article	Final		Scopus	2-s2.0-77956432881	8759057700; 35786509600; 35785795400; 35786643600; 56276664300; 35093860200; 7005940262; 22986120600; 35786498100; 6602989720; 7004805378; 7003571748; 6507662604; 6701325288
chem	Goutte, A., Bustamante, P., Barbraud, C., Delord, K., Weimerskirch, H., Chastel, O.	2014	Demographic responses to mercury exposure in two closely related antarctic top predators	1	Ecology	95	4		1075	1086		86	10.1890/13-1229.1	https://www.scopus.com/inward/record.url?eid=2-s2.0-84898419748&partnerID=40&md5=60e3a84262788fe8b519bd1a9ce47608	Article	Final	All Open Access, Green	Scopus	2-s2.0-84898419748	35772255100; 7005942456; 35616520600; 6506656820; 56213156300; 56238414600
chem	Sundriyal, S., Shukla, T., Tripathee, L., Dobhal, D.P., Tiwari, S.K., Bhan, U.	2018	Deposition of atmospheric pollutant and their chemical characterization in snow pit profile at Dokriani Glacier, Central Himalaya	1	Journal of Mountain Science	15	10		2236	2246		10	10.1007/s11629-017-4817-x	https://www.scopus.com/inward/record.url?eid=2-s2.0-85054687759&partnerID=40&md5=eaa1eff3cb402e66641572f6b19a67c5	Article	Final		Scopus	2-s2.0-85054687759	56444213700; 56723875500; 55577108600; 6602368113; 56642315300; 57200881550
chem	Feng, J., Zhu, X., Wu, H., Ning, C., Lin, G.	2017	Distribution and ecological risk assessment of heavy metals in surface sediments of a typical restored mangrove–aquaculture wetland in Shenzhen, China	1	Marine Pollution Bulletin	124	2		1033	1039		40	10.1016/j.marpolbul.2017.01.004	https://www.scopus.com/inward/record.url?eid=2-s2.0-85009171114&partnerID=40&md5=43b9a5875586912b03593cab862b2829	Article	Final		Scopus	2-s2.0-85009171114	55747307700; 7406187304; 57043655300; 57192932939; 7401700056
chem	Beaumelle, L., Della Vedova, C., Beaugelin-Seiller, K., Garnier-Laplace, J., Gilbin, R.	2017	Ecological risk assessment of mixtures of radiological and chemical stressors: Methodology to implement an msPAF approach	1	Environmental Pollution	231			1421	1432		14	10.1016/j.envpol.2017.09.003	https://www.scopus.com/inward/record.url?eid=2-s2.0-85029696630&partnerID=40&md5=b5d151ea0c22ed67637c9f9b34295c01	Article	Final		Scopus	2-s2.0-85029696630	56177020400; 15043949900; 6602863683; 6603699067; 16315379300
chem	Sun, K.-F., Wang, N., Liu, L.-L., Duan, S.-S.	2013	Ecological risks assessment of organophosphorus pesticides based on response of Scenedesmus quadricanda	1	Zhongguo Huanjing Kexue/China Environmental Science	33	5		868	873		4		https://www.scopus.com/inward/record.url?eid=2-s2.0-84878868925&partnerID=40&md5=ff254797bf48835a6c86d3ec0fc144ca	Article	Final		Scopus	2-s2.0-84878868925	55436319800; 57198399418; 57199084309; 8606096000
chem	Blaise, C., Harwood, M.	1991	Ecotoxicological assessment of tebuthiuron - a substituted urea class herbicide | Contribution a l'evaluation ecotoxicologique du Tebuthiuron - un herbicide de la classe des urees substituees	1	Revue des Sciences de l'Eau	4	1		121	134		10	10.7202/705093ar	https://www.scopus.com/inward/record.url?eid=2-s2.0-0026312823&partnerID=40&md5=32cba633cc1fb71c5df8c06eb34638a2	Article	Final	All Open Access, Bronze	Scopus	2-s2.0-0026312823	7005256786; 7005799949
chem	Wang, X., He, X., Song, J., Herbst, A.	2015	Effect of adjuvant types and concentration on spray drift potential of different nozzles	0	Nongye Gongcheng Xuebao/Transactions of the Chinese Society of Agricultural Engineering	31	22		49	55		26	10.11975/j.issn.1002-6819.2015.22.007	https://www.scopus.com/inward/record.url?eid=2-s2.0-84948681773&partnerID=40&md5=cbd066f681f3b495ff39c5e05c94294e	Article	Final		Scopus	2-s2.0-84948681773	56031143200; 9247966600; 9640195100; 56186205200
chem	Handal, A.J., Lozoff, B., Breilh, J., Harlow, S.D.	2007	Effect of community of residence on neurobehavioral development in infants and young children in a flower-growing region of Ecuador	1	Environmental Health Perspectives	115	1		128	133		48	10.1289/ehp.9261	https://www.scopus.com/inward/record.url?eid=2-s2.0-33845971907&partnerID=40&md5=d03eb0972d8e131b09635494a5c8150c	Article	Final	All Open Access, Bronze, Green	Scopus	2-s2.0-33845971907	57208977398; 7003594692; 57203125456; 7006231491
chem	May, L.A., Burnett, A.R., Miller, C.V., Pisarski, E., Webster, L.F., Moffitt, Z.J., Pennington, P., Wirth, E., Baker, G., Ricker, R., Woodley, C.M.	2020	Effect of Louisiana sweet crude oil on a Pacific coral, Pocillopora damicornis	1	Aquatic Toxicology	222		105454				8	10.1016/j.aquatox.2020.105454	https://www.scopus.com/inward/record.url?eid=2-s2.0-85081270496&partnerID=40&md5=1b00ed89930af592e05fa7528d58dd88	Article	Final	All Open Access, Bronze	Scopus	2-s2.0-85081270496	40262097700; 57141813100; 57215575607; 57132904600; 7102676156; 57199144981; 6701422173; 7006031241; 57189635736; 57191478590; 7006806466
chem	Shen, Z., Hou, D., Jin, F., Shi, J., Fan, X., Tsang, D.C.W., Alessi, D.S.	2019	Effect of production temperature on lead removal mechanisms by rice straw biochars	1	Science of the Total Environment	655			751	758		151	10.1016/j.scitotenv.2018.11.282	https://www.scopus.com/inward/record.url?eid=2-s2.0-85056828934&partnerID=40&md5=511a8f70a74d66ba6357ec074540e7ef	Article	Final	All Open Access, Green	Scopus	2-s2.0-85056828934	56701428100; 55061025600; 36171890900; 57198768202; 57204725858; 12760921200; 7006548150
chem	Steinberg, C.E.W., Lorenz, R., Spieser, O.H.	1995	Effects of atrazine on swimming behavior of zebrafish, Brachydanio rerio	1	Water Research	29	3		981	985		90	10.1016/0043-1354(94)00217-U	https://www.scopus.com/inward/record.url?eid=2-s2.0-0028984001&partnerID=40&md5=22e077786177b3046248e269c7574652	Article	Final		Scopus	2-s2.0-0028984001	11539721500; 7402095398; 6508209263
chem	Rose, R., Rosner, L.	2005	Eighth-year response of Douglas-fir seedlings to area of weed control and herbaceous versus woody weed control	0	Annals of Forest Science	62	6		481	492		25	10.1051/forest:2005053	https://www.scopus.com/inward/record.url?eid=2-s2.0-26944441997&partnerID=40&md5=c2db55cc08a10ba1c3ac0538f150051b	Article	Final	All Open Access, Bronze, Green	Scopus	2-s2.0-26944441997	7402136552; 6701742668
chem	Shadi, A.M.H., Kamaruddin, M.A., Niza, N.M., Emmanuel, M.I., Hossain, M.S., Ismail, N.	2021	Electroflotation treatment of stabilized landfill leachate using titanium-based electrode	1	International Journal of Environmental Science and Technology	18	8		2425	2440		1	10.1007/s13762-020-03005-3	https://www.scopus.com/inward/record.url?eid=2-s2.0-85096368829&partnerID=40&md5=82f80815a14a740885a3a8c2f14f5487	Article	Final		Scopus	2-s2.0-85096368829	57209777765; 44361188400; 54780395700; 57209771541; 55147219600; 57190834500
chem	Wang, Y., Xu, L., Li, D., Teng, M., Zhang, R., Zhou, Z., Zhu, W.	2015	Enantioselective bioaccumulation of hexaconazole and its toxic effects in adult zebrafish (Danio rerio)	1	Chemosphere	138		16407	798	805		45	10.1016/j.chemosphere.2015.08.015	https://www.scopus.com/inward/record.url?eid=2-s2.0-84940919979&partnerID=40&md5=970d959defbd34671f77602c8d448a9b	Article	Final		Scopus	2-s2.0-84940919979	55793182400; 57072075200; 56547556300; 56819772500; 56819483300; 55493233200; 57192008287
chem	Xu, J., Tang, J., Baig, S.A., Lv, X., Xu, X.	2013	Enhanced dechlorination of 2,4-dichlorophenol by Pd/FeFe3O4 nanocomposites	0	Journal of Hazardous Materials	244-245			628	636		76	10.1016/j.jhazmat.2012.10.051	https://www.scopus.com/inward/record.url?eid=2-s2.0-84872609625&partnerID=40&md5=d4c628ac592d1fb9c09f670aba4ef645	Article	Final		Scopus	2-s2.0-84872609625	7407007224; 55558004000; 37099641800; 36782646000; 55706217500
chem	Rusconi, M., Marziali, L., Stefani, F., Valsecchi, S., Bettinetti, R., Mazzoni, M., Rosignoli, F., Polesello, S.	2015	Evaluating the impact of a fluoropolymer plant on a river macrobenthic community by a combined chemical, ecological and genetic approach	1	Science of the Total Environment	538			654	663		8	10.1016/j.scitotenv.2015.08.086	https://www.scopus.com/inward/record.url?eid=2-s2.0-84940426317&partnerID=40&md5=41e2b19ca567a6d368d960853103e8dd	Article	Final		Scopus	2-s2.0-84940426317	51161797800; 6507649491; 57220193620; 6701880827; 8641390900; 56306086800; 56809243500; 56088764300
chem	de Farias, N.O., Oliveira, R., Sousa-Moura, D., de Oliveira, R.C.S., Rodrigues, M.A.C., Andrade, T.S., Domingues, I., Camargo, N.S., Muehlmann, L.A., Grisolia, C.K.	2019	Exposure to low concentration of fluoxetine affects development, behaviour and acetylcholinesterase activity of zebrafish embryos	1	Comparative Biochemistry and Physiology Part - C: Toxicology and Pharmacology	215			1	8		30	10.1016/j.cbpc.2018.08.009	https://www.scopus.com/inward/record.url?eid=2-s2.0-85053332236&partnerID=40&md5=1e5a824657681e0a68a1e869c248ee17	Article	Final		Scopus	2-s2.0-85053332236	57203870517; 25925922300; 57201732214; 57203870048; 57203871611; 56740482900; 18041665600; 57202335586; 26431080000; 7003595234
chem	Michielssen, M.R., Michielssen, E.R., Ni, J., Duhaime, M.B.	2016	Fate of microplastics and other small anthropogenic litter (SAL) in wastewater treatment plants depends on unit processes employed	1	Environmental Science: Water Research and Technology	2	6		1064	1073		173	10.1039/c6ew00207b	https://www.scopus.com/inward/record.url?eid=2-s2.0-84994885726&partnerID=40&md5=e35aa559d5aa150aa74393c16a009983	Article	Final	All Open Access, Hybrid Gold, Green	Scopus	2-s2.0-84994885726	57191925557; 57191923882; 57191923648; 24073064000
chem	Breitwieser, M., Viricel, A., Churlaud, C., Guillot, B., Martin, E., Stenger, P.-L., Huet, V., Fontanaud, A., Thomas-Guyon, H.	2017	First data on three bivalve species exposed to an intra-harbour polymetallic contamination (La Rochelle, France)	1	Comparative Biochemistry and Physiology Part - C: Toxicology and Pharmacology	199			28	37		11	10.1016/j.cbpc.2017.02.006	https://www.scopus.com/inward/record.url?eid=2-s2.0-85014079788&partnerID=40&md5=f595e7347875376ce9a24502e1a88ef7	Article	Final	All Open Access, Green	Scopus	2-s2.0-85014079788	57188587122; 8966280400; 8605636200; 57146918400; 57193454691; 57208797616; 6506022753; 57193449822; 55930219400
chem	Mijošek, T., Filipović Marijić, V., Dragun, Z., Krasnići, N., Ivanković, D., Redžović, Z., Erk, M.	2021	First insight in trace element distribution in the intestinal cytosol of two freshwater fish species challenged with moderate environmental contamination	1	Science of the Total Environment	798		149274				1	10.1016/j.scitotenv.2021.149274	https://www.scopus.com/inward/record.url?eid=2-s2.0-85111731202&partnerID=40&md5=ab71e540ee0f5251498e1c0d5b41a454	Article	Final		Scopus	2-s2.0-85111731202	57193562327; 55551242500; 6506137602; 35800988300; 7005845005; 57195625407; 55891522400
chem	Khan, H.A.A., Khan, M.U., Nasiba, A., Riaz, S., Altaf, M.	2019	Geographical Variations in Life Histories of House Flies, Musca domestica (Diptera: Muscidae), in Punjab, Pakistan	0	Journal of Medical Entomology	56	5		1225	1230		5	10.1093/jme/tjz069	https://www.scopus.com/inward/record.url?eid=2-s2.0-85072057295&partnerID=40&md5=7db8a212abc82dda06189d2e24c02263	Article	Final		Scopus	2-s2.0-85072057295	57226353559; 57210966783; 57210966634; 18937138700; 57210965996
chem	Khondee, P., Srisomsap, C., Chokchaichamnankit, D., Svasti, J., Simpson, R.J., Kingtong, S.	2016	Histopathological effect and stress response of mantle proteome following TBT exposure in the Hooded oyster Saccostrea cucullata	1	Environmental Pollution	218			855	862		11	10.1016/j.envpol.2016.08.011	https://www.scopus.com/inward/record.url?eid=2-s2.0-84991811300&partnerID=40&md5=de7f467e23f664da1a54963ebc1d3dc0	Article	Final		Scopus	2-s2.0-84991811300	57191598084; 55917075900; 9737263400; 7006773706; 7403402188; 22134603400
chem	Leifeld, J.	2012	How sustainable is organic farming?	1	Agriculture, Ecosystems and Environment	150			121	122		59	10.1016/j.agee.2012.01.020	https://www.scopus.com/inward/record.url?eid=2-s2.0-84856997562&partnerID=40&md5=c681216c0a1a461810953bd78d1e0a05	Article	Final		Scopus	2-s2.0-84856997562	55943946300
chem	Castaldini, M., Turrini, A., Sbrana, C., Benedetti, A., Marchionni, M., Mocali, S., Fabiani, A., Landi, S., Santomassimo, F., Pietrangeli, B., Nuti, M.P., Miclaus, N., Giovannetti, M.	2005	Impact of Bt corn on rhizospheric and soil eubacterial communities and on beneficial mycorrhizal symbiosis in experimental microcosms	1	Applied and Environmental Microbiology	71	11		6719	6729		171	10.1128/AEM.71.11.6719-6729.2005	https://www.scopus.com/inward/record.url?eid=2-s2.0-32044468924&partnerID=40&md5=8d0d99751ea6d473943ecad212b4c09d	Article	Final	All Open Access, Green	Scopus	2-s2.0-32044468924	6602350183; 7003525726; 6602113437; 7202059395; 7005131368; 6506384027; 14035454300; 50461793200; 14036260300; 23480548600; 7006728794; 6602479157; 7003506244
chem	Myers, M.S., Anulacion, B.F., French, B.L., Reichert, W.L., Laetz, C.A., Buzitis, J., Olson, O.P., Sol, S., Collier, T.K.	2008	Improved flatfish health following remediation of a PAH-contaminated site in Eagle Harbor, Washington	1	Aquatic Toxicology	88	4		277	288		42	10.1016/j.aquatox.2008.05.005	https://www.scopus.com/inward/record.url?eid=2-s2.0-46249084619&partnerID=40&md5=4fab8f553709ffd575b3c03017ddb63a	Article	Final		Scopus	2-s2.0-46249084619	7402143239; 6603410489; 7102910279; 56371595600; 24366665300; 6505966470; 7004692049; 6602976264; 7102205508
chem	Ololade, I.A., Lajide, L., Olumekun, V.O., Ololade, O.O., Ejelonu, B.C.	2011	Influence of diffuse and chronic metal pollution in water and sediments on edible seafoods within Ondo oil-polluted coastal region, Nigeria	1	Journal of Environmental Science and Health - Part A Toxic/Hazardous Substances and Environmental Engineering	46	8		898	908		24	10.1080/10934529.2011.580208	https://www.scopus.com/inward/record.url?eid=2-s2.0-84855175275&partnerID=40&md5=538a988df5d9612a86e8e3ff1d133a9c	Article	Final		Scopus	2-s2.0-84855175275	20735331100; 6603199433; 53464057900; 57200446195; 13205773600
chem	Haywood, J.D.	2011	Influence of herbicides and felling, fertilization, and prescribed fire on longleaf pine growth and understory vegetation through ten growing seasons and the outcome of an ensuing wildfire	1	New Forests	41	1		55	73		9	10.1007/s11056-010-9209-9	https://www.scopus.com/inward/record.url?eid=2-s2.0-78650520290&partnerID=40&md5=b570bf4ffa3b03ff22855fbda07d0ae3	Article	Final		Scopus	2-s2.0-78650520290	7102805860
chem	Vercauteren, M., Van Hoey, G., Decostere, A., Boyen, F., Ampe, B., Devriese, L., Chiers, K.	2021	Influence of pathogens, fish-related characteristics, and environmental factors on the development of skin ulcerations in wild common dab (Limanda Limanda) from the north sea	0	Journal of Wildlife Diseases	57	2		292	302			10.7589/JWD-D-20-00088	https://www.scopus.com/inward/record.url?eid=2-s2.0-85103994932&partnerID=40&md5=dc5e1493d6fbaee6249bf8cb798fea89	Article	Final		Scopus	2-s2.0-85103994932	57197728038; 6701784197; 7003751173; 8515213600; 24334356100; 37037139000; 6701640392
chem	Wang, Q., Lu, H., Chen, J., Jiang, Y., Williams, M.A., Wu, S., Li, J., Liu, J., Yang, G., Yan, C.	2020	Interactions of soil metals with glomalin-related soil protein as soil pollution bioindicators in mangrove wetland ecosystems	1	Science of the Total Environment	709		136051				12	10.1016/j.scitotenv.2019.136051	https://www.scopus.com/inward/record.url?eid=2-s2.0-85076929006&partnerID=40&md5=73f5fa72a64fbe178690096a69d50a3b	Article	Final		Scopus	2-s2.0-85076929006	57195677995; 55819419700; 57195675226; 57190952391; 56583042600; 57214833361; 57195675501; 57204367240; 55501651600; 57204306557
chem	de Santo, F.B., Guerra, N., Vianna, M.S., Torres, J.P.M., Marchioro, C.A., Niemeyer, J.C.	2019	Laboratory and field tests for risk assessment of metsulfuron-methyl-based herbicides for soil fauna	1	Chemosphere	222			645	655		10	10.1016/j.chemosphere.2019.01.145	https://www.scopus.com/inward/record.url?eid=2-s2.0-85060975766&partnerID=40&md5=f189b3515a95347bd3d687ff492d5357	Article	Final	All Open Access, Bronze	Scopus	2-s2.0-85060975766	57200519600; 36809656400; 57205657553; 15825743200; 52264095200; 26534746300
chem	Di Bella, G., Licata, P., Bruzzese, A., Naccari, C., Trombetta, D., Lo Turco, V., Dugo, G., Richetti, A., Naccari, F.	2006	Levels and congener pattern of polychlorinated biphenyl and organochlorine pesticide residues in bluefin tuna (Thunnus thynnus) from the Straits of Messina (Sicily, Italy)	1	Environment International	32	6		705	710		49	10.1016/j.envint.2006.02.001	https://www.scopus.com/inward/record.url?eid=2-s2.0-33745401918&partnerID=40&md5=03e968a01866017554d0c1847e066bac	Article	Final		Scopus	2-s2.0-33745401918	24464446300; 6603386213; 8605150400; 9280056100; 57202381152; 7801670309; 7005793734; 6603033841; 55910172000
chem	Li, Y., Li, J., Zhang, Y.	2012	Mechanism insights into enhanced Cr(VI) removal using nanoscale zerovalent iron supported on the pillared bentonite by macroscopic and spectroscopic studies	0	Journal of Hazardous Materials	227-228			211	218		109	10.1016/j.jhazmat.2012.05.034	https://www.scopus.com/inward/record.url?eid=2-s2.0-84862664829&partnerID=40&md5=35430eb0aca11e47956b48cb35a56495	Article	Final		Scopus	2-s2.0-84862664829	55719090500; 23972744700; 54953290400
chem	Martinez, G., McCord, S.A., Driscoll, C.T., Todorova, S., Wu, S., Araújo, J.F., Vega, C.M., Fernandez, L.E.	2018	Mercury contamination in riverine sediments and fish associated with artisanal and small-scale gold mining in Madre de Dios, Peru	1	International Journal of Environmental Research and Public Health	15	8	1584				39	10.3390/ijerph15081584	https://www.scopus.com/inward/record.url?eid=2-s2.0-85050677399&partnerID=40&md5=51db8d08165811e2343fe1b5f5f6d0b8	Article	Final	All Open Access, Gold, Green	Scopus	2-s2.0-85050677399	57203144160; 6603235241; 7202046491; 8614147900; 7408446387; 56523378800; 26665779100; 57188758859
chem	McGrew, A.K., Ballweber, L.R., Moses, S.K., Stricker, C.A., Beckmen, K.B., Salman, M.D., O'Hara, T.M.	2014	Mercury in gray wolves (Canis lupus) in Alaska: Increased exposure through consumption of marine prey	1	Science of the Total Environment	468-469			609	613		29	10.1016/j.scitotenv.2013.08.045	https://www.scopus.com/inward/record.url?eid=2-s2.0-84884372077&partnerID=40&md5=59b7faca29c8940dfcaa14135c41d42d	Article	Final	All Open Access, Green	Scopus	2-s2.0-84884372077	55900811300; 7004175879; 26435395700; 23973389700; 6603276142; 35399996200; 7006593721
chem	Anderson, D.W., Suchanek, T.H., Eagles-Smith, C.A., Cahill Jr., T.M.	2008	Mercury residues and productivity in osprey and grebes from a mine-dominated ecosystem	1	Ecological Applications	18	8 SUPPL.		A227	A238		21	10.1890/06-1837.1	https://www.scopus.com/inward/record.url?eid=2-s2.0-67449089265&partnerID=40&md5=b71bf5ba8f1873fa86ad4f02e7f01f45	Article	Final		Scopus	2-s2.0-67449089265	57210177319; 6603700327; 19638652500; 7004411975
chem	O'Day, P.A., Carroll, S.A., Randall, S., Martinelli, R.E., Anderson, S.L., Jelinski, J., Knezovich, J.P.	2000	Metal speciation and bioavailability in contaminated estuary sediments, Alameda Naval Air Station, California	1	Environmental Science and Technology	34	17		3665	3673		89	10.1021/es9913030	https://www.scopus.com/inward/record.url?eid=2-s2.0-0034285040&partnerID=40&md5=78f86ca5c304fed32de99daa09098f31	Article	Final		Scopus	2-s2.0-0034285040	7003472333; 7201476439; 7004464360; 7102659115; 7404216242; 16942263500; 6603961496
chem	Liu, S., Hu, Z., Wu, S., Li, S., Li, Z., Zou, J.	2016	Methane and Nitrous Oxide Emissions Reduced Following Conversion of Rice Paddies to Inland Crab-Fish Aquaculture in Southeast China	1	Environmental Science and Technology	50	2		633	642		80	10.1021/acs.est.5b04343	https://www.scopus.com/inward/record.url?eid=2-s2.0-84955480419&partnerID=40&md5=24b3cb5a798a4aae0c5645da2688c04f	Article	Final		Scopus	2-s2.0-84955480419	57200844021; 56683447000; 56683224400; 55028286200; 12244822700; 7401552091
chem	Ji, X., Liu, C., Zhang, M., Yin, Y., Pan, G.	2020	Mitigation of methylmercury production in eutrophic waters by interfacial oxygen nanobubbles	1	Water Research	173		115563				6	10.1016/j.watres.2020.115563	https://www.scopus.com/inward/record.url?eid=2-s2.0-85079150471&partnerID=40&md5=1b4e29975689797ad2802e64c23d0c8c	Article	Final	All Open Access, Green	Scopus	2-s2.0-85079150471	57209786692; 56625336400; 56130276600; 8236337100; 7201975051
chem	Bhalla, R., Waykar, B.B.	2013	Monitoring of water quality and pollution status of godavari river in and around nashik region, maharashtra	1	Nature Environment and Pollution Technology	12	1		125	129				https://www.scopus.com/inward/record.url?eid=2-s2.0-84878326354&partnerID=40&md5=088f4b2293488da77dd0180732a07316	Article	Final		Scopus	2-s2.0-84878326354	23093256200; 6507239255
chem	Oliveira, M.A., Tomlinson, S.J., Carnell, E.J., Dore, A.J., Serrano, H.C., Vieno, M., Cordovil, C.M.D.S., Dragosits, U., Sutton, M.A., Branquinho, C., Pinho, P.	2020	Nitrogen and sulfur deposition over a region in SW Europe based on a regional atmospheric chemical transport model	1	Atmospheric Environment	223		117290				4	10.1016/j.atmosenv.2020.117290	https://www.scopus.com/inward/record.url?eid=2-s2.0-85078144524&partnerID=40&md5=d418311d026442e5c5323c7fdcded8c2	Article	Final	All Open Access, Green	Scopus	2-s2.0-85078144524	55879380300; 57125638200; 56426277000; 7006598302; 15923767100; 14041006600; 7801359299; 6602524068; 7202968142; 6603447018; 36956153900
chem	Vigneron, A., Geffard, O., Quéau, H., François, A., Chaumot, A.	2019	Nongenetic inheritance of increased Cd tolerance in a field Gammarus fossarum population: Parental exposure steers offspring sensitivity	1	Aquatic Toxicology	209			91	98		7	10.1016/j.aquatox.2019.02.001	https://www.scopus.com/inward/record.url?eid=2-s2.0-85061194397&partnerID=40&md5=48eec844240f5d2f206436ffc21815e2	Article	Final		Scopus	2-s2.0-85061194397	55925743100; 57716754500; 11141259900; 56480134700; 19638702800
chem	Hadi, P., Gao, P., Barford, J.P., McKay, G.	2013	Novel application of the nonmetallic fraction of the recycled printed circuit boards as a toxic heavy metal adsorbent	1	Journal of Hazardous Materials	252-253			166	170		77	10.1016/j.jhazmat.2013.02.037	https://www.scopus.com/inward/record.url?eid=2-s2.0-84875516111&partnerID=40&md5=f537535ecda118b10f30f2d748a15731	Article	Final		Scopus	2-s2.0-84875516111	55633807100; 56822157700; 7005192809; 7202215456
chem	Xing, L., Liu, H., Zhou, J.G.	2020	Numerical study of the antibiotic transport and distribution in the Laizhou Bay, China	1	Environmental Science and Pollution Research	27	30		37760	37772			10.1007/s11356-020-09770-5	https://www.scopus.com/inward/record.url?eid=2-s2.0-85087414819&partnerID=40&md5=8d087405dfa88f69a6fb96a4bf0540d3	Article	Final	All Open Access, Green	Scopus	2-s2.0-85087414819	57204066608; 54920204000; 7405551254
chem	Xie, Z., Lu, G., Liu, J., Yan, Z., Ma, B., Zhang, Z., Chen, W.	2015	Occurrence, bioaccumulation, and trophic magnification of pharmaceutically active compounds in Taihu Lake, China	1	Chemosphere	138			140	147		124	10.1016/j.chemosphere.2015.05.086	https://www.scopus.com/inward/record.url?eid=2-s2.0-84940919571&partnerID=40&md5=bfdff0007a0377ce06e73c67191e1818	Article	Final		Scopus	2-s2.0-84940919571	55607465200; 24752307300; 55334562200; 55334286900; 56669151400; 56196535800; 57087434300
chem	Pan, L., Fang, G., Wang, Y., Wang, L., Su, B., Li, D., Xiang, B.	2018	Potentially toxic element pollution levels and risk assessment of soils and sediments in the upstream river, miyun reservoir, china	1	International Journal of Environmental Research and Public Health	15	11	2364				20	10.3390/ijerph15112364	https://www.scopus.com/inward/record.url?eid=2-s2.0-85055617381&partnerID=40&md5=468ca428e3102faf43c845e652ee5264	Article	Final	All Open Access, Gold, Green	Scopus	2-s2.0-85055617381	55775733100; 56145784400; 55190122200; 57070561700; 55808315200; 55210177500; 55504992100
chem	Shi, Z.M., Xu, L., Hu, F.	2014	Progress in earthworm biomarker studies and theirs applications in soil pollution risk assessment	1	Shengtai Xuebao	34	19		5369	5379		3	10.5846/stxb201301090073	https://www.scopus.com/inward/record.url?eid=2-s2.0-84908193769&partnerID=40&md5=19f3d2d630c565aa5e52f648d20efacf	Article	Final		Scopus	2-s2.0-84908193769	57214957820; 57222708828; 7202526324
chem	Ravaschiere, A., Cutler, C., Edleson, K., Halem, Z., Magun, H., Meckler, F., Cox, R.	2017	Quantification of heat shock protein 70 and acetylcholinesterase over a time course suggests environmental adaptation in a foundational molluscan species	1	Ecotoxicology and Environmental Safety	142			222	229		8	10.1016/j.ecoenv.2017.04.003	https://www.scopus.com/inward/record.url?eid=2-s2.0-85017452320&partnerID=40&md5=7e4a1fd2d9d43ac804eb0030693257f2	Article	Final	All Open Access, Hybrid Gold	Scopus	2-s2.0-85017452320	57192191459; 57193896790; 57502141400; 56177524100; 57193900328; 57193901182; 7403419899
chem	Wang, X., Peng, G., Chen, M., Zhao, M., He, Y., Jiang, Y., Zhang, X., Qin, Y., Lin, S.	2020	Reduced graphene oxide composites and its real-life application potential for in-situ crude oil removal	1	Chemosphere	249		126141				20	10.1016/j.chemosphere.2020.126141	https://www.scopus.com/inward/record.url?eid=2-s2.0-85079124644&partnerID=40&md5=0456d70f0daa4e20f88fd9270d39fcd9	Article	Final		Scopus	2-s2.0-85079124644	57214799440; 56146169500; 57214805847; 57204105538; 57202132049; 56027832100; 57214804437; 55699893600; 57209289744
chem	Belden, J.B., Gilliom, R.J., Martin, J.D., Lydy, M.J.	2007	Relative toxicity and occurrence patterns of pesticide mixtures in streams draining agricultural watersheds dominated by corn and soybean production.	1	Integrated environmental assessment and management	3	1		90	100		62	10.1897/1551-3793(2007)3[90:RTAOPO]2.0.CO;2	https://www.scopus.com/inward/record.url?eid=2-s2.0-33847742149&partnerID=40&md5=1f0735811e2b62bae84c79871f518c8b	Article	Final		Scopus	2-s2.0-33847742149	6701802949; 6701360995; 55946092400; 7004960247
chem	Hook, S.E., Osborn, H.L., Gissi, F., Moncuquet, P., Twine, N.A., Wilkins, M.R., Adams, M.S.	2014	RNA-Seq analysis of the toxicant-induced transcriptome of the marine diatom, Ceratoneis closterium	1	Marine Genomics	16	1		45	53		18	10.1016/j.margen.2013.12.004	https://www.scopus.com/inward/record.url?eid=2-s2.0-84922220064&partnerID=40&md5=e93ef9464fa316c6a8604504a8976219	Article	Final		Scopus	2-s2.0-84922220064	7005339652; 55348098100; 35174730400; 55991409800; 55989180600; 35397295800; 7403905462
chem	[No author name available]	2014	Scientific Opinion on good modelling practice in the context of mechanistic effect models for risk assessment of plant protection products	1	EFSA Journal	12	3	3589				87	10.2903/j.efsa.2014.3589	https://www.scopus.com/inward/record.url?eid=2-s2.0-85078371200&partnerID=40&md5=178b648c815e0e1dc94bfb753fa05960	Article	Final	All Open Access, Gold	Scopus	2-s2.0-85078371200	[No author name available]
chem	Buckman, K.L., Seelen, E.A., Mason, R.P., Balcom, P., Taylor, V.F., Ward, J.E., Chen, C.Y.	2019	Sediment organic carbon and temperature effects on methylmercury concentration: A mesocosm experiment	1	Science of the Total Environment	666			1316	1326		10	10.1016/j.scitotenv.2019.02.302	https://www.scopus.com/inward/record.url?eid=2-s2.0-85062415128&partnerID=40&md5=711b63ba59648b959c1b9981abacd8c8	Article	Final	All Open Access, Green	Scopus	2-s2.0-85062415128	6602423014; 57201286095; 35420452300; 6507980909; 7103021539; 7404120644; 57201937302
chem	Chow, J.C., Watson, J.G., Green, M.C., Wang, X., Chen, L.W.A., Trimble, D.L., Cropper, P.M., Kohl, S.D., Gronstal, S.B.	2018	Separation of brown carbon from black carbon for IMPROVE and Chemical Speciation Network PM2.5 samples	1	Journal of the Air and Waste Management Association	68	5		494	510		44	10.1080/10962247.2018.1426653	https://www.scopus.com/inward/record.url?eid=2-s2.0-85046541571&partnerID=40&md5=0b48321dcd3e5e4769341e8aad75e92c	Article	Final	All Open Access, Bronze	Scopus	2-s2.0-85046541571	7401728833; 7404155062; 7406236357; 35319350600; 7409442137; 13204625300; 55782603900; 7102175397; 56748185500
chem	Lima, T.M.S., Procópio, L.C., Brandão, F.D., Carvalho, A.M.X., Tótola, M.R., Borges, A.C.	2011	Simultaneous phenanthrene and cadmium removal from contaminated soil by a ligand/biosurfactant solution	1	Biodegradation	22	5		1007	1015		24	10.1007/s10532-011-9459-z	https://www.scopus.com/inward/record.url?eid=2-s2.0-79961167980&partnerID=40&md5=3c7a2f42292cd3b0195dc830daee3edf	Article	Final		Scopus	2-s2.0-79961167980	36552841600; 26658741500; 36552088600; 36607546900; 8663984300; 7202692788
chem	Simon-Deckers, A., Loo, S., Mayne-L'Hermite, M., Herlin-Boime, N., Menguy, N., Reynaud, C., Gouget, B., Carriere, M.	2009	Size-, composition- and shape-dependent toxicological impact of metal oxide nanoparticles and carbon nanotubes toward bacteria	1	Environmental Science and Technology	43	21		8423	8429		418	10.1021/es9016975	https://www.scopus.com/inward/record.url?eid=2-s2.0-70350749726&partnerID=40&md5=b8f3919280bd64fc388f4bd63c11ca9d	Article	Final		Scopus	2-s2.0-70350749726	24482415700; 35311428300; 13002777800; 6601975169; 6602074702; 56231405400; 56234890100; 57204320661
chem	Becker, J.C., Groeger, A.W., Nowlin, W.H., Chumchal, M.M., Hahn, D.	2011	Spatial variability in the speciation and bioaccumulation of mercury in an arid subtropical reservoir ecosystem	1	Environmental Toxicology and Chemistry	30	10		2300	2311		7	10.1002/etc.626	https://www.scopus.com/inward/record.url?eid=2-s2.0-80052640128&partnerID=40&md5=ea294864ebaef71ceaa507f6f46c7902	Article	Final	All Open Access, Green	Scopus	2-s2.0-80052640128	7403712472; 7003946292; 13604606200; 8594207200; 7201995204
chem	Souri, A., Masoodi, M., Niyogi, S., Naji, A.	2020	Speciation and risk assessment of selected trace metals in bottom sediment of coral reef ecosystems of the Persian Gulf	1	Environmental Science and Pollution Research	27	17		21416	21428		4	10.1007/s11356-020-08632-4	https://www.scopus.com/inward/record.url?eid=2-s2.0-85083694317&partnerID=40&md5=d27843f3b703eeef91b06170d80bb200	Article	Final		Scopus	2-s2.0-85083694317	57211215938; 41561730500; 35576804800; 35362515500
chem	Salvo, A., Potortì, A.G., Cicero, N., Bruno, M., Turco, V.L., Bella, G.D., Dugo, G.	2014	Statistical characterisation of heavy metal contents in Paracentrotus lividus from Mediterranean Sea	1	Natural Product Research	28	10		718	726		44	10.1080/14786419.2013.878937	https://www.scopus.com/inward/record.url?eid=2-s2.0-84900440124&partnerID=40&md5=372660e2e38f0089e54743b87ede6390	Article	Final		Scopus	2-s2.0-84900440124	57222281803; 26632502200; 36141841100; 7202870264; 7801670309; 24464446300; 7005793734
chem	Zhao, X., Liu, C., Zuo, L., Wang, L., Zhu, Q., Liu, Y., Zhou, B.	2020	Synthesis and characterization of fly ash geopolymer paste for goaf backfill: Reuse of soda residue	1	Journal of Cleaner Production	260		121045				30	10.1016/j.jclepro.2020.121045	https://www.scopus.com/inward/record.url?eid=2-s2.0-85081735798&partnerID=40&md5=e7d08a291c529518414ceafcf5eb8a6e	Article	Final		Scopus	2-s2.0-85081735798	56768278400; 41361456900; 57206938656; 57190428934; 57204758451; 57204766154; 57211558904
chem	He, M., Shen, H., Li, Z., Wang, L., Wang, F., Zhao, K., Liu, X., Wendroth, O., Xu, J.	2019	Ten-year regional monitoring of soil-rice grain contamination by heavy metals with implications for target remediation and food safety	1	Environmental Pollution	244			431	439		67	10.1016/j.envpol.2018.10.070	https://www.scopus.com/inward/record.url?eid=2-s2.0-85056158199&partnerID=40&md5=6469b85665fb93fd1677f78ba297f66b	Article	Final		Scopus	2-s2.0-85056158199	57204020093; 57204568605; 57194015320; 57221649267; 57196010847; 22959262800; 8543886900; 57203352507; 36635031300
chem	Leung, S.S., MacKinnon, M.D., Smith, R.E.H.	2003	The ecological effects of naphthenic acids and salts on phytoplankton from the Athabasca oil sands region	1	Aquatic Toxicology	62	1		11	26		87	10.1016/S0166-445X(02)00057-7	https://www.scopus.com/inward/record.url?eid=2-s2.0-12244298922&partnerID=40&md5=d0e11640437076c3ee0c2d7e54be663b	Article	Final		Scopus	2-s2.0-12244298922	7202044801; 7102399447; 56655654800
chem	Xiang, N., Jiang, C., Huang, W., Nordhaus, I., Zhou, H., Drews, M., Diao, X.	2019	The impact of acute benzo(a)pyrene on antioxidant enzyme and stress-related genes in tropical stony corals (Acropora spp.)	1	Science of the Total Environment	694		133474				8	10.1016/j.scitotenv.2019.07.280	https://www.scopus.com/inward/record.url?eid=2-s2.0-85073703970&partnerID=40&md5=056e889add8d7eaf7130977ef7ad905d	Article	Final		Scopus	2-s2.0-85073703970	57195240304; 57200497204; 57204712819; 12242114600; 55716792400; 57204705476; 8161500500
chem	Liu, J., Haffner, G.D., Drouillard, K.G.	2010	The influence of diet on the assimilation efficiency of 47 polychlorinated biphenyl congeners in Japanese koi (Cyprinus carpio)	1	Environmental Toxicology and Chemistry	29	2		401	409		22	10.1002/etc.47	https://www.scopus.com/inward/record.url?eid=2-s2.0-77951113330&partnerID=40&md5=d936ae18494b0c9ca2660283054b8b29	Article	Final		Scopus	2-s2.0-77951113330	55361324500; 7006621306; 6603936268
chem	Maruya, K.A., Dodder, N.G., Weisberg, S.B., Gregorio, D., Bishop, J.S., Klosterhaus, S., Alvarez, D.A., Furlong, E.T., Bricker, S., Kimbrough, K.L., Lauenstein, G.G.	2014	The mussel watch California pilot study on contaminants of emerging concern (CECs): Synthesis and next steps	1	Marine Pollution Bulletin	81	2		355	363		37	10.1016/j.marpolbul.2013.04.023	https://www.scopus.com/inward/record.url?eid=2-s2.0-84899970721&partnerID=40&md5=7245cfc4fbf4a5497a665a9387355e1c	Article	Final		Scopus	2-s2.0-84899970721	7005817551; 6507643027; 7006652796; 8575988700; 56152008000; 6507957673; 7102548880; 7005753720; 7003593984; 6507173607; 6602179006
chem	Peng, G., Bellerby, R., Zhang, F., Sun, X., Li, D.	2020	The ocean's ultimate trashcan: Hadal trenches as major depositories for plastic pollution	1	Water Research	168		115121				75	10.1016/j.watres.2019.115121	https://www.scopus.com/inward/record.url?eid=2-s2.0-85072916995&partnerID=40&md5=0f80b86754525742e8f6a98a7dc80a84	Article	Final		Scopus	2-s2.0-85072916995	57193886493; 6701835697; 57211686065; 57197781816; 9333337900
chem	Bailon, M.X., David, A.S., Park, Y., Kim, E., Hong, Y.	2018	Total mercury, methyl mercury, and heavy metal concentrations in Hyeongsan River and its tributaries in Pohang city, South Korea	1	Environmental Monitoring and Assessment	190	5	274				17	10.1007/s10661-018-6624-4	https://www.scopus.com/inward/record.url?eid=2-s2.0-85045314552&partnerID=40&md5=90efe0460c274be5eb63ba8c26e6dee7	Article	Final		Scopus	2-s2.0-85045314552	57201583327; 57201587625; 57201583246; 55965918700; 37761423700
chem	Pinto, R., de Jonge, V.N., Neto, J.M., Domingos, T., Marques, J.C., Patrício, J.	2013	Towards a DPSIR driven integration of ecological value, water uses and ecosystem services for estuarine systems	1	Ocean and Coastal Management	72			64	79		84	10.1016/j.ocecoaman.2011.06.016	https://www.scopus.com/inward/record.url?eid=2-s2.0-84872688092&partnerID=40&md5=9c7e911f3f71c258504bccf5b24d28e2	Article	Final		Scopus	2-s2.0-84872688092	15078783400; 7004654319; 55950022600; 6506853774; 7203032961; 55522809100
chem	Du, J., Mei, C.-F., Ying, G.-G., Xu, M.-Y.	2016	Toxicity Thresholds for Diclofenac, Acetaminophen and Ibuprofen in the Water Flea Daphnia magna	1	Bulletin of Environmental Contamination and Toxicology	97	1		84	90		44	10.1007/s00128-016-1806-7	https://www.scopus.com/inward/record.url?eid=2-s2.0-84964335796&partnerID=40&md5=24ec4443c05f8d7fbe3f56f8adffb44d	Article	Final		Scopus	2-s2.0-84964335796	57198429088; 56396170900; 7006664489; 7403607027
chem	Sase, H., Saito, T., Takahashi, M., Morohashi, M., Yamashita, N., Inomata, Y., Ohizumi, T., Nakata, M.	2021	Transboundary air pollution reduction rapidly reflected in stream water chemistry in forested catchment on the sea of Japan coast in central Japan	1	Atmospheric Environment	248		118223				6	10.1016/j.atmosenv.2021.118223	https://www.scopus.com/inward/record.url?eid=2-s2.0-85100419201&partnerID=40&md5=a985c155cb0aaac721c56cf17e116ad7	Article	Final	All Open Access, Hybrid Gold	Scopus	2-s2.0-85100419201	6507640520; 57204766376; 57189489077; 57213740505; 57223589063; 36871965000; 6603858989; 7202180949
chem	Kwandrans, J.	2002	Upper Vistula River: Response of aquatic communities to pollution and impoundment. IX. Benthic diatom communities	1	Polish Journal of Ecology	50	2		223	236		16		https://www.scopus.com/inward/record.url?eid=2-s2.0-0036086832&partnerID=40&md5=16a683e1431114eb1374841479713f6d	Article	Final		Scopus	2-s2.0-0036086832	6602897341
chem	Wu, Q., Du, Y., Huang, Z., Gu, J., Leung, J.Y.S., Mai, B., Xiao, T., Liu, W., Fu, J.	2019	Vertical profile of soil/sediment pollution and microbial community change by e-waste recycling operation	1	Science of the Total Environment	669			1001	1010		21	10.1016/j.scitotenv.2019.03.178	https://www.scopus.com/inward/record.url?eid=2-s2.0-85063037974&partnerID=40&md5=448a75636997ee826946a85832fa991f	Article	Final		Scopus	2-s2.0-85063037974	56078173400; 57205367268; 56420767400; 7403129601; 55792745500; 7004684142; 7103094085; 55572335400; 35769164900
chem	Froehlicher, M., Liedtke, A., Groh, K.J., Neuhauss, S.C.F., Segner, H., Eggen, R.I.L.	2009	Zebrafish (Danio rerio) neuromast: Promising biological endpoint linking developmental and toxicological studies	1	Aquatic Toxicology	95	4		307	319		90	10.1016/j.aquatox.2009.04.007	https://www.scopus.com/inward/record.url?eid=2-s2.0-71549129516&partnerID=40&md5=fe852a1ae93596861141aafaade7efde	Article	Final		Scopus	2-s2.0-71549129516	26431323700; 24436286700; 26633870900; 6701398760; 7004956984; 7006684054
cc	Dubreuil, A.	2009	""perspective conference of the CNRS institute of ecology and environment"". Conference report proceedings (Rennes, May 12-13, 2009) | "" Colloque de prospective de l'Institut Icologie et Environnement du CNRS "" Compte rendu de colloque (Rennes, 12-13 mai 2009)	1	Natures Sciences Societes	17	4		412	416			10.1051/nss/2009055	https://www.scopus.com/inward/record.url?eid=2-s2.0-77949955973&partnerID=40&md5=83cacd15618f1f8c9f7b0f8456560d93	Article	Final	All Open Access, Gold, Green	Scopus	2-s2.0-77949955973	35762779000
cc	Hartsough, P., Tyler, S.W., Sterling, J., Walvoord, M.	2001	A 14.6 kyr record of nitrogen flux from desert soil profiles as inferred from vadose zone pore waters	1	Geophysical Research Letters	28	15		2955	2958		34	10.1029/2000GL011823	https://www.scopus.com/inward/record.url?eid=2-s2.0-0035419958&partnerID=40&md5=341618e98b17c7c009878c09776b4878	Article	Final	All Open Access, Bronze	Scopus	2-s2.0-0035419958	6507222571; 7103350171; 22949417500; 6602886211
cc	Keppel-Aleks, G., Basile, S.J., Hoffman, F.M.	2018	A functional response metric for the temperature sensitivity of tropical ecosystems	1	Earth Interactions	22	7		1	20		3	10.1175/EI-D-17-0017.1	https://www.scopus.com/inward/record.url?eid=2-s2.0-85049626952&partnerID=40&md5=28a88b06727868dfd598f7f7cc5473c1	Article	Final	All Open Access, Bronze	Scopus	2-s2.0-85049626952	23485501700; 57194577133; 57214263501
cc	Staub, J., Chatterton, J., Bushman, S., Johnson, D., Jones, T., Larson, S., Robins, J., Monaco, T.	2016	A History of Plant Improvement by the USDA-ARS Forage and Range Research Laboratory for Rehabilitation of Degraded Western U.S. Rangelands	0	Rangelands	38	5		233	240		5	10.1016/j.rala.2016.08.004	https://www.scopus.com/inward/record.url?eid=2-s2.0-84994047137&partnerID=40&md5=e9969c5a0c8dd384824af9075e851372	Article	Final	All Open Access, Hybrid Gold, Green	Scopus	2-s2.0-84994047137	57206502483; 57191829752; 56746421100; 23477550000; 57202518192; 7202795309; 14830694400; 6701649926
cc	Urrego, D.H., Bush, M.B., Silman, M.R.	2010	A long history of cloud and forest migration from Lake Consuelo, Peru	1	Quaternary Research	73	2		364	373		46	10.1016/j.yqres.2009.10.005	https://www.scopus.com/inward/record.url?eid=2-s2.0-76949084255&partnerID=40&md5=d9b228e2e20a1850c637ff6278114320	Article	Final		Scopus	2-s2.0-76949084255	10639674700; 55951088700; 6602205640
cc	Smith, M., Jackson, C., Palmer, N., Palmer, B.	2020	A structured analysis of risk to important wildlife elements in three Australian Wildlife Conservancy sanctuaries	1	Ecological Management and Restoration	21	1		42	50		1	10.1111/emr.12392	https://www.scopus.com/inward/record.url?eid=2-s2.0-85074564096&partnerID=40&md5=9fa82485e2f01bd83aa472b682462fab	Article	Final		Scopus	2-s2.0-85074564096	15037991000; 57211607512; 57211604411; 57211600693
cc	Smith, C.R., Mincks, S., DeMaster, D.J.	2006	A synthesis of bentho-pelagic coupling on the Antarctic shelf: Food banks, ecosystem inertia and global climate change	1	Deep-Sea Research Part II: Topical Studies in Oceanography	53	44842		875	894		153	10.1016/j.dsr2.2006.02.001	https://www.scopus.com/inward/record.url?eid=2-s2.0-33746843137&partnerID=40&md5=180c79c92f7f8e206d8dae044dbc2c59	Article	Final		Scopus	2-s2.0-33746843137	7501648696; 36473568400; 7005832822
cc	Hernández-Moreno, J.A., Velázquez-Martínez, A., Fierros-González, A.M., Gómez-Guerrero, A., Reyes-Hernández, V.J., Vera-Castillo, J.A.G.	2020	Aboveground biomass and carbon estimation in stands with and without forest management at the Monarch Butterfly Biosphere Reserve | Estimación de biomasa aérea y carbono, en rodales con y sin manejo forestal en la Reserva de la Biosfera Mariposa Monarca	1	Madera y Bosques	26	1	e2611802					10.21829/myb.2020.2611802	https://www.scopus.com/inward/record.url?eid=2-s2.0-85085871465&partnerID=40&md5=0485466fee60860cfde38819fb38e8da	Article	Final	All Open Access, Gold	Scopus	2-s2.0-85085871465	57190131884; 55628860900; 22134219500; 57219777669; 55504207900; 8550859800
cc	Cael, B.B., Dutkiewicz, S., Henson, S.	2021	Abrupt shifts in 21st-century plankton communities	1	Science Advances	7	44	eabf8593				1	10.1126/sciadv.abf8593	https://www.scopus.com/inward/record.url?eid=2-s2.0-85118397492&partnerID=40&md5=7c73858fd6d28d9e39c67b0b2c10d25f	Article	Final	All Open Access, Gold, Green	Scopus	2-s2.0-85118397492	56993934000; 7004190042; 8071539200
cc	Wu, D., Piao, S., Zhu, D., Wang, X., Ciais, P., Bastos, A., Xu, X., Xu, W.	2020	Accelerated terrestrial ecosystem carbon turnover and its drivers	1	Global Change Biology	26	9		5052	5062		11	10.1111/gcb.15224	https://www.scopus.com/inward/record.url?eid=2-s2.0-85087648622&partnerID=40&md5=4ed8e641d2348dbbf92ee2694002bd9d	Article	Final		Scopus	2-s2.0-85087648622	55792755800; 6701581547; 57203623540; 56011580500; 55399842300; 57021138000; 56069856000; 55994631200
cc	Amatya, D.M., Douglas-Mankin, K.R., Williams, T.M., Skaggs, R.W., Nettles, J.E.	2011	Advances in forest hydrology: Challenges and opportunities	1	Transactions of the ASABE	54	6		2049	2056		9		https://www.scopus.com/inward/record.url?eid=2-s2.0-84855608686&partnerID=40&md5=e494a7170d6d734f50f36fdd146ca849	Article	Final		Scopus	2-s2.0-84855608686	6604049191; 25936043700; 7404171718; 7101743779; 24477917500
cc	Forrest, J.R.K., James D. Thomson	2011	An examination of synchrony between insect emergence and flowering in Rocky Mountain meadows	1	Ecological Monographs	81	3		469	491		171	10.1890/10-1885.1	https://www.scopus.com/inward/record.url?eid=2-s2.0-80051536675&partnerID=40&md5=7287eef3013e4534f3516ef432e2ae5e	Article	Final		Scopus	2-s2.0-80051536675	23496218000; 49661652800
cc	Leger, E.A.	2013	Annual plants change in size over a century of observations	1	Global Change Biology	19	7		2229	2239		15	10.1111/gcb.12208	https://www.scopus.com/inward/record.url?eid=2-s2.0-84878638321&partnerID=40&md5=b954eb5d7f3ee71671603761eb23165d	Article	Final		Scopus	2-s2.0-84878638321	6603742789
cc	Fukami, T., Dickie, I.A., Paula Wilkie, J., Paulus, B.C., Park, D., Roberts, A., Buchanan, P.K., Allen, R.B.	2010	Assembly history dictates ecosystem functioning: Evidence from wood decomposer communities	0	Ecology Letters	13	6		675	684		392	10.1111/j.1461-0248.2010.01465.x	https://www.scopus.com/inward/record.url?eid=2-s2.0-77954007713&partnerID=40&md5=9201018540d5472853b17b710d1abace	Article	Final		Scopus	2-s2.0-77954007713	36141587500; 6602667032; 36605053500; 7003468970; 9233862500; 55464776200; 7006359924; 7404224031
cc	Eticha, T.K., Rikiti, A.K., Abdisa, S.S., Ejeta, A.G.	2021	Assessing effects of rainfall on farming activities as the predictor of climate changes in sadi chanka district of kellem wolega, oromia, Ethiopia	1	Journal of Water and Climate Change	12	7		3297	3307		2	10.2166/wcc.2021.363	https://www.scopus.com/inward/record.url?eid=2-s2.0-85121027755&partnerID=40&md5=a7b7dc0466fc16ae544543c5e74c734e	Article	Final	All Open Access, Gold	Scopus	2-s2.0-85121027755	57370727000; 57371154600; 57370793100; 57371081900
cc	Andrew, N.R., Hill, S.J., Binns, M., Bahar, M.H., Ridley, E.V., Jung, M.-P., Fyfe, C., Yates, M., Khusro, M.	2013	Assessing insect responses to climate change: What are we testing for? Where should we be heading?	1	PeerJ	2013	1	e11				92	10.7717/peerj.11	https://www.scopus.com/inward/record.url?eid=2-s2.0-84877128039&partnerID=40&md5=21d55d364c34cd2157c8f14a2b841bc7	Article	Final	All Open Access, Gold, Green	Scopus	2-s2.0-84877128039	7005866223; 7402765778; 55676806800; 21933268400; 55208828300; 57199666444; 36681150100; 37862471600; 6504640163
cc	Justice, C., White, S.M., McCullough, D.A., Graves, D.S., Blanchard, M.R.	2017	Can stream and riparian restoration offset climate change impacts to salmon populations?	1	Journal of Environmental Management	188			212	227		66	10.1016/j.jenvman.2016.12.005	https://www.scopus.com/inward/record.url?eid=2-s2.0-85006246825&partnerID=40&md5=17638dc27da7fdfd7d11a970991ce92d	Article	Final	All Open Access, Hybrid Gold	Scopus	2-s2.0-85006246825	57192415598; 24377183000; 35966401700; 32367685300; 57192415443
cc	Ma, X., Feng, Q., Yu, T., Su, Y., Deo, R.C.	2017	Carbon dioxide fluxes and their environmental controls in a riparian forest within the hyper-arid region of Northwest China	1	Forests	8	10	379				3	10.3390/f8100379	https://www.scopus.com/inward/record.url?eid=2-s2.0-85030643077&partnerID=40&md5=b582e9def7bfd5798be31517029c19b9	Article	Final	All Open Access, Gold, Green	Scopus	2-s2.0-85030643077	57212237280; 56004333300; 35847939600; 16204056300; 8630380500
cc	Hopkins, S.S.B.	2007	Causes of lineage decline in the Aplodontidae: Testing for the influence of physical and biological change	1	Palaeogeography, Palaeoclimatology, Palaeoecology	246	44653		331	353		25	10.1016/j.palaeo.2006.10.006	https://www.scopus.com/inward/record.url?eid=2-s2.0-33947155234&partnerID=40&md5=fef3a38d3935e2f74d9c896401c2c266	Article	Final		Scopus	2-s2.0-33947155234	8983555100
cc	Pierre, C., Grippa, M., Mougin, E., Guichard, F., Kergoat, L.	2016	Changes in Sahelian annual vegetation growth and phenology since 1960: A modeling approach	1	Global and Planetary Change	143			162	174		11	10.1016/j.gloplacha.2016.06.009	https://www.scopus.com/inward/record.url?eid=2-s2.0-84975796647&partnerID=40&md5=68aad0d6d3c5fb79f5d9f621cca99087	Article	Final		Scopus	2-s2.0-84975796647	51061476800; 6603490041; 7003798418; 7004854393; 6602743662
cc	Adhikari, A., White, J.D.	2016	Climate change impacts on regenerating shrubland productivity	1	Ecological Modelling	337			211	220		4	10.1016/j.ecolmodel.2016.07.003	https://www.scopus.com/inward/record.url?eid=2-s2.0-84978701044&partnerID=40&md5=90ec7f870c85c42550fe2d78acc65cf9	Article	Final		Scopus	2-s2.0-84978701044	55292825500; 56202040700
cc	Liu, Y.	2021	Climate change in river basin based on machine learning and regional financial risk identification	1	Arabian Journal of Geosciences	14	15	1541					10.1007/s12517-021-07963-x	https://www.scopus.com/inward/record.url?eid=2-s2.0-85111517515&partnerID=40&md5=1c3c3e59999aa2d4c2fe68c9d4ed7522	Article	Final		Scopus	2-s2.0-85111517515	57226430355
cc	Tonelli, M., Signori, C.N., Bendia, A., Neiva, J., Ferrero, B., Pellizari, V., Wainer, I.	2021	Climate Projections for the Southern Ocean Reveal Impacts in the Marine Microbial Communities Following Increases in Sea Surface Temperature	1	Frontiers in Marine Science	8		636226				4	10.3389/fmars.2021.636226	https://www.scopus.com/inward/record.url?eid=2-s2.0-85107198748&partnerID=40&md5=ea4bddfc0878fba2b713ca77c6b740b3	Article	Final	All Open Access, Gold	Scopus	2-s2.0-85107198748	57195507988; 55489860400; 55498326700; 57224200520; 57197480637; 6506877129; 7103399784
cc	Rasheed, M.A., McKenna, S.A., Carter, A.B., Coles, R.G.	2014	Contrasting recovery of shallow and deep water seagrass communities following climate associated losses in tropical north Queensland, Australia	1	Marine Pollution Bulletin	83	2		491	499		63	10.1016/j.marpolbul.2014.02.013	https://www.scopus.com/inward/record.url?eid=2-s2.0-84902082568&partnerID=40&md5=7e95a6450acac412bd40e77acf857502	Article	Final	All Open Access, Green	Scopus	2-s2.0-84902082568	7003615985; 8563836500; 24329164900; 7103156233
cc	Oyler, J.W., Ballantyne, A., Jencso, K., Sweet, M., Running, S.W.	2015	Creating a topoclimatic daily air temperature dataset for the conterminous United States using homogenized station data and remotely sensed land skin temperature	1	International Journal of Climatology	35	9		2258	2279		138	10.1002/joc.4127	https://www.scopus.com/inward/record.url?eid=2-s2.0-84937074260&partnerID=40&md5=99cbbf7f73834c1d3faaca33b6119e35	Article	Final		Scopus	2-s2.0-84937074260	55671210600; 7006591842; 26667829200; 7006178622; 7005395607
cc	Wilby, R.L.	1995	Critical Loads‘ Sensitivity to Climate Change	1	Environmental Conservation	22	4		363	365		11	10.1017/S0376892900034962	https://www.scopus.com/inward/record.url?eid=2-s2.0-0029556430&partnerID=40&md5=01ee15a747a8bafb5e98ace115f032af	Article	Final		Scopus	2-s2.0-0029556430	7005446783
cc	Hoekman, D., Springer, Y.P., Barker, C.M., Barrera, R., Blackmore, M.S., Bradshaw, W.E., Foley, D.H., Ginsberg, H.S., Hayden, M.H., Holzapfel, C.M., Juliano, S.A., Kramer, L.D., LaDeau, S.L., Livdahl, T.P., Moore, C.G., Nasci, R.S., Reisen, W.K., Savage, H.M.	2016	Design for mosquito abundance, diversity, and phenology sampling within the National Ecological Observatory Network	1	Ecosphere	7	5	e01320				12	10.1002/ecs2.1320	https://www.scopus.com/inward/record.url?eid=2-s2.0-84975121968&partnerID=40&md5=dd36b9070a20c9db44601758c36c6c59	Article	Final	All Open Access, Gold, Green	Scopus	2-s2.0-84975121968	56271175400; 15835512700; 7201818475; 7006335148; 7003944516; 7005486622; 7103079104; 7102877725; 9635846500; 7006509279; 7005705727; 7201597208; 6507835181; 6602126625; 7402982357; 7003450551; 7004966946; 7005057840
cc	Tang, Y., Shao, Q., Liu, J., Zhang, H., Yang, F., Cao, W., Wu, D., Gong, G.	2019	Did ecological restoration hit its mark? Monitoring and assessing ecological changes in the grain for green program region using multi-source satellite images	0	Remote Sensing	11	3	358				12	10.3390/rs11030358	https://www.scopus.com/inward/record.url?eid=2-s2.0-85061373370&partnerID=40&md5=b61f914f5761342dd84a6993e5598570	Article	Final	All Open Access, Gold, Green	Scopus	2-s2.0-85061373370	57200423024; 7101974470; 56046928000; 57276596600; 57198992522; 56875079900; 35732747900; 56919174500
cc	Ropars, P., Angers-Blondin, S., Gagnon, M., Myers-Smith, I.H., Lévesque, E., Boudreau, S.	2017	Different parts, different stories: climate sensitivity of growth is stronger in root collars vs. stems in tundra shrubs	1	Global Change Biology	23	8		3281	3291		22	10.1111/gcb.13631	https://www.scopus.com/inward/record.url?eid=2-s2.0-85017397461&partnerID=40&md5=e8c53ea93d0e40e540f903ba8a7eca9a	Article	Final	All Open Access, Green	Scopus	2-s2.0-85017397461	36193233200; 57193891284; 57220727187; 57218360138; 6701692182; 6701578630
cc	Verburg, P.S.J., Young, A.C., Stevenson, B.A., Glanzmann, I., Arnone, J.A., Marion, G.M., Holmes, C., Nowak, R.S.	2013	Do increased summer precipitation and N deposition alter fine root dynamics in a Mojave Desert ecosystem?	1	Global Change Biology	19	3		948	956		23	10.1111/gcb.12082	https://www.scopus.com/inward/record.url?eid=2-s2.0-84873148906&partnerID=40&md5=1c80d6fbf21ff7c6bd7f004933ea2314	Article	Final		Scopus	2-s2.0-84873148906	57203257999; 55533988700; 8231008500; 55533668700; 7003665422; 7004424649; 57213249646; 57210338475
cc	Somers, K.A., Bernhardt, E.S., Mcglynn, B.L., Urban, D.L.	2016	Downstream Dissipation of Storm Flow Heat Pulses: A Case Study and its Landscape-Level Implications	1	Journal of the American Water Resources Association	52	2		281	297		14	10.1111/1752-1688.12382	https://www.scopus.com/inward/record.url?eid=2-s2.0-84963645994&partnerID=40&md5=bd673be15f37707d3b481f7598a82456	Article	Final		Scopus	2-s2.0-84963645994	55891218900; 7007044685; 57207518788; 35568952900
cc	Gao, D., Joseph, J., Werner, R.A., Brunner, I., Zürcher, A., Hug, C., Wang, A., Zhao, C., Bai, E., Meusburger, K., Gessler, A., Hagedorn, F.	2021	Drought alters the carbon footprint of trees in soils—tracking the spatio-temporal fate of 13C-labelled assimilates in the soil of an old-growth pine forest	1	Global Change Biology	27	11		2491	2506		15	10.1111/gcb.15557	https://www.scopus.com/inward/record.url?eid=2-s2.0-85102699359&partnerID=40&md5=98d503d95638fa48065e71171a521695	Article	Final	All Open Access, Hybrid Gold, Green	Scopus	2-s2.0-85102699359	56114270900; 57189322215; 7202442681; 7004142218; 35575518100; 7004680300; 36610866000; 57204083640; 23967639700; 25223410500; 7004656290; 7003609370
cc	Zhang, S., Wen, G., Yang, D.	2019	Drought-induced mortality is related to hydraulic vulnerability segmentation of tree species in a Savanna ecosystem	1	Forests	10	8	697				3	10.3390/f10080697	https://www.scopus.com/inward/record.url?eid=2-s2.0-85071131351&partnerID=40&md5=4f373d4f5149d7ea3f81bac4bd4742d0	Article	Final	All Open Access, Gold, Green	Scopus	2-s2.0-85071131351	56099101200; 57202339652; 57202815679
cc	Raven, J.A., Gobler, C.J., Hansen, P.J.	2020	Dynamic CO2 and pH levels in coastal, estuarine, and inland waters: Theoretical and observed effects on harmful algal blooms	1	Harmful Algae	91		101594				45	10.1016/j.hal.2019.03.012	https://www.scopus.com/inward/record.url?eid=2-s2.0-85063889731&partnerID=40&md5=103e692a3c9fa8f264b95fef32d070a8	Article	Final	All Open Access, Hybrid Gold, Green	Scopus	2-s2.0-85063889731	7103305526; 6603619458; 55665602800
cc	Feehan, C.J., Grace, S.P., Narvaez, C.A.	2019	Ecological feedbacks stabilize a turf-dominated ecosystem at the southern extent of kelp forests in the Northwest Atlantic	1	Scientific Reports	9	1	7078				14	10.1038/s41598-019-43536-5	https://www.scopus.com/inward/record.url?eid=2-s2.0-85065496540&partnerID=40&md5=6baad9f9c3776f96956a9607a12205fd	Article	Final	All Open Access, Gold, Green	Scopus	2-s2.0-85065496540	36496601500; 22947062500; 57189985408
cc	Takemi, T., Ito, R., Arakawa, O.	2016	Effects of global warming on the impacts of Typhoon Mireille (1991) in the Kyushu and Tohoku regions	1	Hydrological Research Letters	10	3		81	87		18	10.3178/hrl.10.81	https://www.scopus.com/inward/record.url?eid=2-s2.0-85046238034&partnerID=40&md5=8a7dd891124dfedb8e756229204c3383	Article	Final	All Open Access, Gold, Green	Scopus	2-s2.0-85046238034	9249605700; 56480014400; 36655323000
cc	Huang, L., Xiao, T., Zhao, Z., Sun, C., Liu, J., Shao, Q., Fan, J., Wang, J.	2013	Effects of grassland restoration programs on ecosystems in arid and semiarid China	1	Journal of Environmental Management	117			268	275		50	10.1016/j.jenvman.2012.12.040	https://www.scopus.com/inward/record.url?eid=2-s2.0-84873283242&partnerID=40&md5=275cc741b86715f2e1fa150f7f0692ef	Article	Final		Scopus	2-s2.0-84873283242	55321762900; 57200086588; 55578326500; 7404248675; 56046928000; 7101974470; 7402794493; 22136639500
cc	Zhang, Y., Virjamo, V., Sobuj, N., Du, W., Yin, Y., Nybakken, L., Guo, H., Julkunen-Tiitto, R.	2018	Elevated temperature and CO2 affect responses of European aspen (Populus tremula) to soil pyrene contamination	1	Science of the Total Environment	634			150	157		2	10.1016/j.scitotenv.2018.03.344	https://www.scopus.com/inward/record.url?eid=2-s2.0-85044927453&partnerID=40&md5=5b259e227bf9afb04fc662ca09ca0710	Article	Final		Scopus	2-s2.0-85044927453	56909896800; 37032252000; 57195373156; 54888423400; 36057665300; 7801521099; 7404404180; 7004458670
cc	Martin, S.A., Rautsaw, R.M., Bolt, M.R., Parkinson, C.L., Seigel, R.A.	2018	Estimating the response of wildlife communities to coastal dune construction	1	Ocean and Coastal Management	161			31	36		1	10.1016/j.ocecoaman.2018.04.021	https://www.scopus.com/inward/record.url?eid=2-s2.0-85046359206&partnerID=40&md5=437f47612b3c70af40bee6ab4ebca46d	Article	Final		Scopus	2-s2.0-85046359206	57195220282; 57204206788; 36118632000; 7102253084; 7003328656
cc	Galli, A., Peruzzi, C., Beltrame, L., Cislaghi, A., Masseroni, D.	2021	Evaluating the infiltration capacity of degraded vs. rehabilitated urban greenspaces: Lessons learnt from a real-world Italian case study	1	Science of the Total Environment	787		147612				4	10.1016/j.scitotenv.2021.147612	https://www.scopus.com/inward/record.url?eid=2-s2.0-85106247949&partnerID=40&md5=1546a1b9748d4354dd14c672c620ce20	Article	Final	All Open Access, Green	Scopus	2-s2.0-85106247949	57224608056; 57203971220; 56426021500; 57126167100; 53984766500
cc	García, S.G., Montequín, V.R., Fernández, R.L., Fernández, F.O.	2019	Evaluation of the synergies in cogeneration with steel waste gases based on Life Cycle Assessment: A combined coke oven and steelmaking gas case study	1	Journal of Cleaner Production	217			576	583		21	10.1016/j.jclepro.2019.01.262	https://www.scopus.com/inward/record.url?eid=2-s2.0-85061306516&partnerID=40&md5=639dcb6ce07d7352fdad4794142ca5d8	Article	Final		Scopus	2-s2.0-85061306516	57205727970; 57202382537; 57205732679; 57202034232
cc	McManus, L.C., Tekwa, E.W., Schindler, D.E., Walsworth, T.E., Colton, M.A., Webster, M.M., Essington, T.E., Forrest, D.L., Palumbi, S.R., Mumby, P.J., Pinsky, M.L.	2021	Evolution reverses the effect of network structure on metapopulation persistence	1	Ecology	102	7	e03381				3	10.1002/ecy.3381	https://www.scopus.com/inward/record.url?eid=2-s2.0-85107160617&partnerID=40&md5=92f5324e0edf8e1984b9b9904660146b	Article	Final	All Open Access, Green	Scopus	2-s2.0-85107160617	57189834075; 56698256500; 57204254582; 55626142800; 15847996400; 57206441160; 6603663413; 57222338488; 7004573915; 7003596162; 8608637700
cc	Gollan, J.R., Ashcroft, M.B., Ramp, D.	2013	Fine-grained climate data alters the interpretation of a trait-based cline	1	Ecosphere	4	12	154				2	10.1890/ES13-00275.1	https://www.scopus.com/inward/record.url?eid=2-s2.0-84901016311&partnerID=40&md5=19539ec5749122e977a0f6a4c885b4f7	Article	Final	All Open Access, Gold, Green	Scopus	2-s2.0-84901016311	23992186400; 14055401000; 8917824300
cc	Wassmann, P., Duarte, C.M., Agustí, S., Sejr, M.K.	2011	Footprints of climate change in the Arctic marine ecosystem	1	Global Change Biology	17	2		1235	1249		522	10.1111/j.1365-2486.2010.02311.x	https://www.scopus.com/inward/record.url?eid=2-s2.0-78650777994&partnerID=40&md5=509816d82e1c31f88535a47cbca2a36d	Article	Final		Scopus	2-s2.0-78650777994	7003594013; 55636631300; 7003718000; 6603493963
cc	Dah-gbeto, A.P., Villamor, G.B.	2016	Gender-specific responses to climate variability in a semi-arid ecosystem in northern Benin	1	Ambio	45			297	308		20	10.1007/s13280-016-0830-5	https://www.scopus.com/inward/record.url?eid=2-s2.0-84996520598&partnerID=40&md5=051789c5e1e2c6935df00a03cf380065	Article	Final	All Open Access, Hybrid Gold, Green	Scopus	2-s2.0-84996520598	57192069464; 14629692200
cc	Pastor, J., Solin, J., Bridgham, S.D., Updegraff, K., Harth, C., Weishampel, P., Dewey, B.	2003	Global warming and the export of dissolved organic carbon from boreal peatlands	1	Oikos	100	2		380	386		193	10.1034/j.1600-0706.2003.11774.x	https://www.scopus.com/inward/record.url?eid=2-s2.0-0037648792&partnerID=40&md5=c5f2699e3ede3c485a03119cc949e99e	Article	Final		Scopus	2-s2.0-0037648792	7201639608; 6603759001; 7004252716; 7003412737; 6603149270; 6505819858; 7004029292
cc	Ganguly, I., Pierobon, F., Hall, E.S.	2020	Global warming mitigating role of wood products from Washington state's private forests	1	Forests	11	2	194				7	10.3390/f11020194	https://www.scopus.com/inward/record.url?eid=2-s2.0-85081115673&partnerID=40&md5=1f54801a8ebc8081cade0c31aed8ab1e	Article	Final	All Open Access, Gold, Green	Scopus	2-s2.0-85081115673	57203427583; 56426980300; 57215548569
cc	Platts, P.J., Mason, S.C., Palmer, G., Hill, J.K., Oliver, T.H., Powney, G.D., Fox, R., Thomas, C.D.	2019	Habitat availability explains variation in climate-driven range shifts across multiple taxonomic groups	1	Scientific Reports	9	1	15039				43	10.1038/s41598-019-51582-2	https://www.scopus.com/inward/record.url?eid=2-s2.0-85073656810&partnerID=40&md5=120d5c93ea7355d3ecd10511bdcf1f81	Article	Final	All Open Access, Gold, Green	Scopus	2-s2.0-85073656810	24477677700; 56684118200; 56684178300; 54792020400; 12446349500; 36155042400; 14025403600; 7404413845
cc	Lovenduski, N.S., Bonan, G.B., Yeager, S.G., Lindsay, K., Lombardozzi, D.L.	2019	High predictability of terrestrial carbon fluxes from an initialized decadal prediction system	1	Environmental Research Letters	14	12	124074				12	10.1088/1748-9326/ab5c55	https://www.scopus.com/inward/record.url?eid=2-s2.0-85081690380&partnerID=40&md5=d328c4d9d31a91f8bcf53fdf453576d2	Article	Final	All Open Access, Gold, Green	Scopus	2-s2.0-85081690380	8667741900; 7005557215; 7003693594; 7101816869; 25823275400
cc	Purse, B.V., Masante, D., Golding, N., Pigott, D., Day, J.C., Ibañez-Bernal, S., Kolb, M., Jones, L.	2017	How will climate change pathways and mitigation options alter incidence of vector-borne diseases? A framework for leishmaniasis in South and Meso-America	1	PLoS ONE	12	10	e0183583				25	10.1371/journal.pone.0183583	https://www.scopus.com/inward/record.url?eid=2-s2.0-85031114202&partnerID=40&md5=1de7354ece6d48ce284016a983b5c7da	Article	Final	All Open Access, Gold, Green	Scopus	2-s2.0-85031114202	6603159674; 57193823219; 36942802800; 55320335600; 7403323728; 6602708990; 57188670058; 34771306700
cc	Lai, K.P., Wang, S.Y., Li, J.W., Tong, Y., Chan, T.F., Jin, N., Tse, A., Zhang, J.W., Wan, M.T., Tam, N., Au, D.W.T., Lee, B.-Y., Lee, J.-S., Wong, A.S.T., Kong, R.Y.C., Wu, R.S.S.	2019	Hypoxia Causes Transgenerational Impairment of Ovarian Development and Hatching Success in Fish	1	Environmental Science and Technology	53	7		3917	3928		15	10.1021/acs.est.8b07250	https://www.scopus.com/inward/record.url?eid=2-s2.0-85063367136&partnerID=40&md5=fb1639193574b9d7efcf88303275056e	Article	Final		Scopus	2-s2.0-85063367136	7402135707; 56611182800; 57214206975; 57190090299; 36795660300; 57195770492; 55886493900; 22137260600; 57192803626; 57207958199; 7004909228; 55682869000; 57201265245; 23987963300; 7005290687; 7402945079
cc	Ghosh, M., Mandal, S., Chatterjee, M.	2018	Impact of unusual monsoonal rainfall in structuring meiobenthic assemblages at Sundarban estuarine system, India	1	Ecological Indicators	94			139	150		5	10.1016/j.ecolind.2018.06.067	https://www.scopus.com/inward/record.url?eid=2-s2.0-85049314596&partnerID=40&md5=af3f7b2c1031cbf87dda5b383461af0c	Article	Final		Scopus	2-s2.0-85049314596	57209634662; 57212403543; 57213027904
cc	Boyd, M.A., Berner, L.T., Doak, P., Goetz, S.J., Rogers, B.M., Wagner, D., Walker, X.J., Mack, M.C.	2019	Impacts of climate and insect herbivory on productivity and physiology of trembling aspen (Populus tremuloides) in Alaskan boreal forests	1	Environmental Research Letters	14	8	85010				17	10.1088/1748-9326/ab215f	https://www.scopus.com/inward/record.url?eid=2-s2.0-85070097111&partnerID=40&md5=7ba3829a7dc47562aa5c85ef7bcd9234	Article	Final	All Open Access, Gold, Green	Scopus	2-s2.0-85070097111	57211125090; 36520887700; 7003306047; 35607650700; 39262305900; 7401982911; 33568447100; 35560658500
cc	Latinne, A., Meynard, C.N., Herbreteau, V., Waengsothorn, S., Morand, S., Michaux, J.R.	2015	Influence of past and future climate changes on the distribution of three Southeast Asian murine rodents	1	Journal of Biogeography	42	9		1714	1726		19	10.1111/jbi.12528	https://www.scopus.com/inward/record.url?eid=2-s2.0-84938741087&partnerID=40&md5=942e2592606f480dfd873bcdc056d660	Article	Final	All Open Access, Green	Scopus	2-s2.0-84938741087	26032248800; 17341064700; 12142204300; 16030006100; 7006833126; 35583323100
cc	Young, H.S., McCauley, D.J., Dirzo, R., Nunn, C.L., Campana, M.G., Agwanda, B., Otarola-Castillo, E.R., Castillo, E.R., Pringle, R.M., Veblen, K.E., Salkeld, D.J., Stewardson, K., Fleischer, R., Lambin, E.F., Palmer, T.M., Helgen, K.M.	2017	Interacting effects of land use and climate on rodent-borne pathogens in central Kenya	1	Philosophical Transactions of the Royal Society B: Biological Sciences	372	1722	20160116				31	10.1098/rstb.2016.0116	https://www.scopus.com/inward/record.url?eid=2-s2.0-85018708727&partnerID=40&md5=47e9147dd3290dea846ce6a03d8e366e	Article	Final	All Open Access, Hybrid Gold, Green	Scopus	2-s2.0-85018708727	36017871700; 14424362300; 7003959015; 7006318774; 35322058800; 24075534400; 25629989200; 56354666300; 8678395500; 16064991300; 14322371600; 35103595700; 7101789259; 7006191947; 7202750247; 6602538000
cc	Vogel, N., Cantin, N.E., Strahl, J., Kaniewska, P., Bay, L., Wild, C., Uthicke, S.	2016	Interactive effects of ocean acidification and warming on coral reef associated epilithic algal communities under past, present-day and future ocean conditions	1	Coral Reefs	35	2		715	728		7	10.1007/s00338-015-1392-x	https://www.scopus.com/inward/record.url?eid=2-s2.0-84953399305&partnerID=40&md5=db64101e2c912a60b7076de24d0bf78d	Article	Final		Scopus	2-s2.0-84953399305	54404247600; 22984449500; 24460834200; 26663310200; 7004687149; 35320721300; 6603938554
cc	Young, M.H., Robinson, D.A., Ryel, R.J.	2010	Introduction to coupling soil science and hydrology with ecology: Toward integrating landscape processes	1	Vadose Zone Journal	9	3		515	516		3	10.2136/vzj2010.0011	https://www.scopus.com/inward/record.url?eid=2-s2.0-79960229650&partnerID=40&md5=6e7721849e65590f3bdd023cb8a15317	Article	Final		Scopus	2-s2.0-79960229650	7404193334; 55489406600; 7003854098
cc	Thompson, J.R., Duncan, S.L., Johnson, K.N.	2009	Is there potential for the historical range of variability to guide conservation given the social range of variability?	1	Ecology and Society	14	1					22	10.5751/ES-02482-140118	https://www.scopus.com/inward/record.url?eid=2-s2.0-69149096009&partnerID=40&md5=6a80b3622072d1e99a5f9daf6cf36f6a	Article	Final	All Open Access, Gold, Green	Scopus	2-s2.0-69149096009	55492716300; 14065837800; 57196263608
cc	Tabor, N.J., Yapp, C.J.	2005	Juxtaposed permian and pleistocene isotopic archives: Surficial environments recorded in calcite and goethite from the Wichita Mountains, Oklahoma	1	Special Paper of the Geological Society of America	395			55	70		21	10.1130/0-8137-2395-7.55	https://www.scopus.com/inward/record.url?eid=2-s2.0-53049103763&partnerID=40&md5=ce2e6b0d4c55ff0ce8b5673434223f86	Article	Final		Scopus	2-s2.0-53049103763	6603087463; 7004387990
cc	Hu, Y., Zhu, F., Wang, X., Guan, C., An, Y., Lei, C.	2012	Latitudinal pattern in body size in a cockroach, Eupolyphaga sinensis	1	Entomologia Experimentalis et Applicata	144	2		223	230		5	10.1111/j.1570-7458.2012.01281.x	https://www.scopus.com/inward/record.url?eid=2-s2.0-84863428640&partnerID=40&md5=c90c85a0f1bac5c6f86957b48e78fe4c	Article	Final		Scopus	2-s2.0-84863428640	56042058600; 8980111600; 56368367200; 55250106300; 55249519200; 8966819000
cc	Sloan, V.L., Fletcher, B.J., Press, M.C., Williams, M., Phoenix, G.K.	2013	Leaf and fine root carbon stocks and turnover are coupled across Arctic ecosystems	1	Global Change Biology	19	12		3668	3676		30	10.1111/gcb.12322	https://www.scopus.com/inward/record.url?eid=2-s2.0-84887428930&partnerID=40&md5=e406d4dcc66a70afe65c67d1e4813341	Article	Final		Scopus	2-s2.0-84887428930	49864567400; 9248741100; 7101918716; 35461262000; 6602732085
cc	Ulrey, C., Quintana-Ascencio, P.F., Kauffman, G., Smith, A.B., Menges, E.S.	2016	Life at the top: Long-term demography, microclimatic refugia, and responses to climate change for a high-elevation southern Appalachian endemic plant	1	Biological Conservation	200			80	92		27	10.1016/j.biocon.2016.05.028	https://www.scopus.com/inward/record.url?eid=2-s2.0-84973496600&partnerID=40&md5=14cd5efa4f4869928cd8abf2cdaf24e6	Article	Final		Scopus	2-s2.0-84973496600	8929109800; 6602118668; 57189626455; 55556139400; 7003687876
cc	Kral, I., Piringer, G., Saylor, M.K., Lizasoain, J., Gronauer, A., Bauer, A.	2020	Life cycle assessment of biogas production from unused grassland biomass pretreated by steam explosion using a system expansion method	1	Sustainability (Switzerland)	12	23	9945	1	17		3	10.3390/su12239945	https://www.scopus.com/inward/record.url?eid=2-s2.0-85096834310&partnerID=40&md5=a7a41d06a4746a38d9ad5d368b2384a2	Article	Final	All Open Access, Gold, Green	Scopus	2-s2.0-85096834310	56912447100; 23095387800; 56206420700; 55676152500; 6506976491; 55676823600
cc	Hufkens, K., Friedl, M., Sonnentag, O., Braswell, B.H., Milliman, T., Richardson, A.D.	2012	Linking near-surface and satellite remote sensing measurements of deciduous broadleaf forest phenology	1	Remote Sensing of Environment	117			307	321		197	10.1016/j.rse.2011.10.006	https://www.scopus.com/inward/record.url?eid=2-s2.0-84855434315&partnerID=40&md5=563885b475c8a81f8ce53d27ab973e1c	Article	Final		Scopus	2-s2.0-84855434315	23567909400; 7007018426; 16310507500; 6701404373; 36925637500; 7402534046
cc	Weber, T., Deutsch, C.	2014	Local versus basin-scale limitation of marine nitrogen fixation	1	Proceedings of the National Academy of Sciences of the United States of America	111	24		8741	8746		47	10.1073/pnas.1317193111	https://www.scopus.com/inward/record.url?eid=2-s2.0-84902590787&partnerID=40&md5=02c1b76e2db3e194bd8dfccf3de096c4	Article	Final	All Open Access, Green	Scopus	2-s2.0-84902590787	36524209900; 24331435900
cc	Ma, J., Yuan, C., Zhou, J., Li, Y., Gao, G., Fu, B.	2021	Logistic model outperforms allometric regression to estimate biomass of xerophytic shrubs	0	Ecological Indicators	132		108278				2	10.1016/j.ecolind.2021.108278	https://www.scopus.com/inward/record.url?eid=2-s2.0-85116712435&partnerID=40&md5=d8f2ea85b752335614e8c3c8b1c4c3d2	Article	Final	All Open Access, Gold	Scopus	2-s2.0-85116712435	57289422700; 57674868500; 57289601600; 57226029674; 55725554400; 57207275546
cc	Magritsky, D.V., Frolova, N.L., Evstigneev, V.M., Povalishnikova, E.S., Kireeva, M.B., Pakhomova, O.M.	2017	Long-term changes of river water inflow into the seas of the russian arctic sector	1	Polarforschung	87	2		177	194		15	10.2312/polarforschung.87.2.177	https://www.scopus.com/inward/record.url?eid=2-s2.0-85064883484&partnerID=40&md5=cfcd1aced7bc3a9df240fad8e1369ae0	Article	Final		Scopus	2-s2.0-85064883484	6505787939; 15730547400; 7006043902; 6507910598; 55880486700; 6701847048
cc	Carlson, B.Z., Renaud, J., Biron, P.E., Choler, P.	2014	Long-term modeling of the forest-grassland ecotone in the French Alps: Implications for land management and conservation	0	Ecological Applications	24	5		1213	1225		23	10.1890/13-0910.1	https://www.scopus.com/inward/record.url?eid=2-s2.0-84903825505&partnerID=40&md5=1cfa972ce1ada3dd533f174039b987fe	Article	Final		Scopus	2-s2.0-84903825505	50760962600; 55749558100; 56252339300; 6602442573
cc	Monk, W.A., Wood, P.J., Hannah, D.M., Wilson, D.A.	2008	Macroinvertebrate community response to inter-annual and regional river flow regime dynamics	1	River Research and Applications	24	7		988	1001		110	10.1002/rra.1120	https://www.scopus.com/inward/record.url?eid=2-s2.0-52949099544&partnerID=40&md5=ce415ea75f0f8dde18ca9a8c7e71194d	Article	Final	All Open Access, Green	Scopus	2-s2.0-52949099544	6506606921; 56244624600; 7006309552; 55478325200
cc	Shoo, L.P., Hoffmann, A.A., Garnett, S., Pressey, R.L., Williams, Y.M., Taylor, M., Falconi, L., Yates, C.J., Scott, J.K., Alagador, D., Williams, S.E.	2013	Making decisions to conserve species under climate change	1	Climatic Change	119	2		239	246		66	10.1007/s10584-013-0699-2	https://www.scopus.com/inward/record.url?eid=2-s2.0-84879179617&partnerID=40&md5=676ceb282837eee7deb3fe68bdf79176	Article	Final	All Open Access, Hybrid Gold, Green	Scopus	2-s2.0-84879179617	8622098900; 7401903027; 7004285282; 7006823219; 16641075600; 37018815800; 55580582000; 35567453600; 55477037900; 16202194900; 7404834819
cc	Yu, G.-R., Niu, S.-L., Li, F.-D., Zhang, L.-M., Chen, W.-N.	2021	Manipulative experiments networks on response and adaptation of terrestrial ecosystems to environmental changes: Building the research methods and technology system | 陆地生态系统环境控制实验的研究方法及技术体系	1	Chinese Journal of Applied Ecology	32	7		2275	2289			10.13287/j.1001-9332.202107.036	https://www.scopus.com/inward/record.url?eid=2-s2.0-85110538497&partnerID=40&md5=9d3ff5e46b90a01c99b9126b9cae54b9	Article	Final		Scopus	2-s2.0-85110538497	55807480400; 7103052205; 24067141700; 55077923500; 57209600123
cc	Terentieva, I.E., Glagolev, M.V., Lapshina, E.D., Sabrekov, A.F., Maksyutov, S.	2016	Mapping of West Siberian taiga wetland complexes using Landsat imagery: Implications for methane emissions	1	Biogeosciences	13	16		4615	4626		32	10.5194/bg-13-4615-2016	https://www.scopus.com/inward/record.url?eid=2-s2.0-84983268250&partnerID=40&md5=d5080f574665fd8eed55c44d6883db5b	Article	Final	All Open Access, Gold, Green	Scopus	2-s2.0-84983268250	57188732868; 6507276186; 9234526600; 55350240000; 6602773904
cc	Ayllón, D., Railsback, S.F., Harvey, B.C., García Quirós, I., Nicola, G.G., Elvira, B., Almodóvar, A.	2019	Mechanistic simulations predict that thermal and hydrological effects of climate change on Mediterranean trout cannot be offset by adaptive behaviour, evolution, and increased food production	1	Science of the Total Environment	693		133648				14	10.1016/j.scitotenv.2019.133648	https://www.scopus.com/inward/record.url?eid=2-s2.0-85073640626&partnerID=40&md5=dda3b80c2bc4f4c2fb7cd9a6c23fedce	Article	Final		Scopus	2-s2.0-85073640626	35195222900; 6603827999; 7103106734; 57211365326; 7004357997; 6603040068; 55880342300
cc	Liguori, G., Di Lorenzo, E.	2018	Meridional Modes and Increasing Pacific Decadal Variability Under Anthropogenic Forcing	1	Geophysical Research Letters	45	2		983	991		35	10.1002/2017GL076548	https://www.scopus.com/inward/record.url?eid=2-s2.0-85040861239&partnerID=40&md5=1ffb5c1fc2134da8901f5a8a8a673bf8	Article	Final		Scopus	2-s2.0-85040861239	55258418800; 8948405600
cc	Petrone, R.M., Solondz, D.S., Macrae, M.L., Gignac, D., Devito, K.J.	2011	Microtopographical and canopy cover controls on moss carbon dioxide exchange in a western Boreal Plain peatland	1	Ecohydrology	4	1		115	129		19	10.1002/eco.139	https://www.scopus.com/inward/record.url?eid=2-s2.0-78751565063&partnerID=40&md5=2a7adffa35401f3943a42e2f24226369	Article	Final		Scopus	2-s2.0-78751565063	6603933650; 39661412000; 7004428360; 39660939200; 6603681175
cc	Grünhage, L., Hanewald, K., Dörger, G., Schmid, T., Hans-Juergen, Kammann, C., Lenhart, K., Streitfert, A.	2009	Nature does not help to stop the rise in CO 2: Station for environmental observation and research on climatic consequences in Linden | Die Natur hilft nicht den CO 2-Anstieg zu bremsen Umweltbeobachtung- Und Klimafolgenforschungsstation Linden	1	Wasser und Abfall	11	10		43	45				https://www.scopus.com/inward/record.url?eid=2-s2.0-70449596103&partnerID=40&md5=a95815378d01654050c9184dd28e7b69	Article	Final		Scopus	2-s2.0-70449596103	7004547001; 6602606797; 36714882800; 35173724700; 55667490400; 6602231021; 22135214400; 35320498700
cc	De La Fayette, L.A.	2008	Oceans governance in the arctic	0	International Journal of Marine and Coastal Law	23	3		531	566		24	10.1163/092735208X331908	https://www.scopus.com/inward/record.url?eid=2-s2.0-53949102453&partnerID=40&md5=d8ec998de5e0d6759ff9c9b45e28eba6	Article	Final		Scopus	2-s2.0-53949102453	6602548387
cc	Ansede-Bermejo, J., Gavilan, R.G., TriÑanes, J., Espejo, R.T., Martinez-Urtaza, J.	2010	Origins and colonization history of pandemic Vibrio parahaemolyticus in South America	0	Molecular Ecology	19	18		3924	3937		20	10.1111/j.1365-294X.2010.04782.x	https://www.scopus.com/inward/record.url?eid=2-s2.0-77956605443&partnerID=40&md5=bc3b3f32f4db546a8277c6fdc79dbacd	Article	Final		Scopus	2-s2.0-77956605443	25930801000; 26121187200; 7801492160; 7005327355; 6603000100
cc	Augustin, F., Houle, D., Gagnon, C., Couture, S., Courchesne, F.	2015	Partitioning the impact of environmental factors on lake concentrations and catchment budgets for base cations in forested ecosystems	1	Applied Geochemistry	53			1	12		8	10.1016/j.apgeochem.2014.11.013	https://www.scopus.com/inward/record.url?eid=2-s2.0-84920116042&partnerID=40&md5=1b31bcccbbc68809ac437f1d09527d4e	Article	Final		Scopus	2-s2.0-84920116042	56465742900; 57207524025; 7102066614; 6701416703; 35585776800
cc	Hart, J., O'Keefe, K., Augustine, S.P., McCulloh, K.A.	2020	Physiological responses of germinant Pinus palustris and P. taeda seedlings to water stress and the significance of the grass-stage	1	Forest Ecology and Management	458		117647				4	10.1016/j.foreco.2019.117647	https://www.scopus.com/inward/record.url?eid=2-s2.0-85076843061&partnerID=40&md5=756ca76835df761a32e0ab5d26b81d1b	Article	Final	All Open Access, Bronze	Scopus	2-s2.0-85076843061	57212495068; 7005687095; 57210853952; 8639796700
cc	Ahmad, R., Khuroo, A.A., Hamid, M., Charles, B., Rashid, I.	2019	Predicting invasion potential and niche dynamics of Parthenium hysterophorus (Congress grass) in India under projected climate change	1	Biodiversity and Conservation							28	10.1007/s10531-019-01775-y	https://www.scopus.com/inward/record.url?eid=2-s2.0-85066887459&partnerID=40&md5=13316df3a4d930cfa0274a8f96ada9a4	Article	Article in Press		Scopus	2-s2.0-85066887459	57209220674; 57219219687; 57188880361; 57203244389; 57202041503
cc	Coppock, D.L.	2011	Ranching and multiyear droughts in Utah: Production impacts, risk perceptions, and changes in preparedness	1	Rangeland Ecology and Management	64	6		607	618		43	10.2111/REM-D-10-00113.1	https://www.scopus.com/inward/record.url?eid=2-s2.0-81855183861&partnerID=40&md5=57ca32147d37196b0388d06e1faecd50	Article	Final	All Open Access, Green	Scopus	2-s2.0-81855183861	7003809477
cc	Nie, X., Hu, Z., Zhu, Q., Ruan, M.	2021	Research on temporal and spatial resolution and the driving forces of ecological environment quality in coal mining areas considering topographic correction	1	Remote Sensing	13	14	2815				7	10.3390/rs13142815	https://www.scopus.com/inward/record.url?eid=2-s2.0-85111296940&partnerID=40&md5=9b8be080c2797d14b777da6658b497cc	Article	Final	All Open Access, Green	Scopus	2-s2.0-85111296940	57226354034; 8257473500; 57204534871; 57211356224
cc	Hall, D.O., Ojima, D.S., Parton, W.J., Scurlock, J.M.O.	1995	Response of temperate and tropical grasslands to CO2 and climate change	1	Journal of Biogeography	22	44622		537	547		61	10.2307/2845952	https://www.scopus.com/inward/record.url?eid=2-s2.0-0029529817&partnerID=40&md5=4439896c287a4909c72f16b60a1496f9	Article	Final		Scopus	2-s2.0-0029529817	7404434402; 7003982726; 7005868860; 7003780568
cc	Nandintsetseg, B., Boldgiv, B., Chang, J., Ciais, P., Davaanyam, E., Batbold, A., Bat-Oyun, T., Stenseth, N.C.	2021	Risk and vulnerability of Mongolian grasslands under climate change	1	Environmental Research Letters	16	3	34035				15	10.1088/1748-9326/abdb5b	https://www.scopus.com/inward/record.url?eid=2-s2.0-85102399441&partnerID=40&md5=8d73703888996c159802986a4d1b092b	Article	Final	All Open Access, Gold, Green	Scopus	2-s2.0-85102399441	16064676300; 26533940100; 56582989700; 57218389786; 57201669415; 56155776000; 55316983600; 16040160500
cc	Li, J., Wu, C., Wang, X., Peng, J., Dong, D., Lin, G., Gonsamo, A.	2020	Satellite observed indicators of the maximum plant growth potential and their responses to drought over Tibetan Plateau (1982–2015)	1	Ecological Indicators	108		105732				16	10.1016/j.ecolind.2019.105732	https://www.scopus.com/inward/record.url?eid=2-s2.0-85072158433&partnerID=40&md5=235326d9b0084936d7fef53c0e4374b9	Article	Final		Scopus	2-s2.0-85072158433	57211006742; 57223829911; 57189849444; 57208329704; 55174904600; 55638198100; 24402523700
cc	Lamy, T., Reed, D.C., Rassweiler, A., Siegel, D.A., Kui, L., Bell, T.W., Simons, R.D., Miller, R.J.	2018	Scale-specific drivers of kelp forest communities	1	Oecologia	186	1		217	233		18	10.1007/s00442-017-3994-1	https://www.scopus.com/inward/record.url?eid=2-s2.0-85032819471&partnerID=40&md5=226e8571c0246e17951f5fb808d3c80b	Article	Final		Scopus	2-s2.0-85032819471	48461497200; 7402980307; 8673550900; 7202706097; 57212875772; 55226036600; 15137323300; 57212081565
cc	Silva-Rocha, I., Salvi, D., Sillero, N., Mateo, J.A., Carretero, M.A.	2015	Snakes on the balearic islands:An invasion tale with implications for native biodiversity conservation	1	PLoS ONE	10	4	e0121026				31	10.1371/journal.pone.0121026	https://www.scopus.com/inward/record.url?eid=2-s2.0-84928920084&partnerID=40&md5=3548c99290342a758614b35be78bc196	Article	Final	All Open Access, Gold, Green	Scopus	2-s2.0-84928920084	55536154000; 36882557900; 25654091900; 7102972563; 57219770588
cc	Zheng, H., Lin, H., Zhu, X.	2019	Spatiotemporal patterns of terrestrial evapotranspiration in response to climate and vegetation coverage changes across the Chinese Loess Plateau	1	Water (Switzerland)	11	8	1625				6	10.3390/w11081625	https://www.scopus.com/inward/record.url?eid=2-s2.0-85070319921&partnerID=40&md5=6da7f6c9decba1c88068b457cf419b0f	Article	Final	All Open Access, Gold, Green	Scopus	2-s2.0-85070319921	55477462700; 57192807291; 57001593700
cc	Bender, S.F., Plantenga, F., Neftel, A., Jocher, M., Oberholzer, H.-R., Köhl, L., Giles, M., Daniell, T.J., Van Der Heijden, M.G.A.	2014	Symbiotic relationships between soil fungi and plants reduce N2O emissions from soil	0	ISME Journal	8	6		1336	1345		118	10.1038/ismej.2013.224	https://www.scopus.com/inward/record.url?eid=2-s2.0-84901250137&partnerID=40&md5=06d2da18c18ca89d207b1a53ade6c3f0	Article	Final	All Open Access, Green	Scopus	2-s2.0-84901250137	55965619500; 57189641059; 35597466500; 15755594400; 14060723900; 55966187500; 55643091200; 7004936211; 56464821900
cc	Vicuna, S., Dracup, J.A.	2007	The evolution of climate change impact studies on hydrology and water resources in California	1	Climatic Change	82	44654		327	350		118	10.1007/s10584-006-9207-2	https://www.scopus.com/inward/record.url?eid=2-s2.0-34247223230&partnerID=40&md5=486fd33c36db8c1f2c9444fd7eaacde6	Article	Final		Scopus	2-s2.0-34247223230	57203488570; 7007031850
cc	Turpie, J.K.	2003	The existence value of biodiversity in South Africa: How interest, experience, knowledge, income and perceived level of threat influence local willingness to pay	0	Ecological Economics	46	2		199	216		116	10.1016/S0921-8009(03)00122-8	https://www.scopus.com/inward/record.url?eid=2-s2.0-0345530991&partnerID=40&md5=0de6097bae9d9a4390a09c554b26b5c0	Article	Final		Scopus	2-s2.0-0345530991	6603841182
cc	Bedford, J., Ostle, C., Johns, D.G., Budria, A., McQuatters-Gollop, A.	2020	The influence of temporal scale selection on pelagic habitat biodiversity indicators	1	Ecological Indicators	114		106311				5	10.1016/j.ecolind.2020.106311	https://www.scopus.com/inward/record.url?eid=2-s2.0-85082396490&partnerID=40&md5=1c58dd59afe182f1f62fd8792528cbc6	Article	Final	All Open Access, Hybrid Gold, Green	Scopus	2-s2.0-85082396490	56183697900; 55886427200; 57210719249; 56447011300; 16646373900
cc	Borges, E.R., Dexter, K.G., Pyles, M.V., Bueno, M.L., Santos, R.M.D., Fontes, M.A.L., Carvalho, F.A.	2021	The interaction of land-use history and tree species diversity in driving variation in the aboveground biomass of urban versus non-urban tropical forests	1	Ecological Indicators	129		107915				2	10.1016/j.ecolind.2021.107915	https://www.scopus.com/inward/record.url?eid=2-s2.0-85108330328&partnerID=40&md5=edbc16ff32c3d62490f6fc5302016663	Article	Final	All Open Access, Gold, Green	Scopus	2-s2.0-85108330328	57205680396; 35725436800; 57203171665; 55623988000; 23004366400; 7103283295; 16027795500
cc	Alexander, S., Aronson, J., Whaley, O., Lamb, D.	2016	The relationship between ecological restoration and the ecosystem services concept	1	Ecology and Society	21	1	34				54	10.5751/ES-08288-210134	https://www.scopus.com/inward/record.url?eid=2-s2.0-84962662611&partnerID=40&md5=a969c9d82557a26e18c1b25d0b5d51e5	Article	Final	All Open Access, Gold, Green	Scopus	2-s2.0-84962662611	48461032000; 7202580727; 35265370600; 56017151900
cc	Pauna, V.H., Picone, F., Le Guyader, G., Buonocore, E., Franzese, P.P.	2018	The scientific research on ecosystem services: A bibliometric analysis	1	Ecological Questions	29	3		53	62		44	10.12775/EQ.2018.022	https://www.scopus.com/inward/record.url?eid=2-s2.0-85057558966&partnerID=40&md5=5d9a27397c74f7bf97e4013a8c030f82	Article	Final	All Open Access, Bronze	Scopus	2-s2.0-85057558966	57205260089; 57193242320; 57205266533; 47061068900; 25928400400
cc	Wu, X., Kang, X., Liu, W., Cui, X., Hao, Y., Wang, Y.	2018	Using the DNDC model to simulate the potential of carbon budget in the meadow and desert steppes in Inner Mongolia, China	1	Journal of Soils and Sediments	18	1		63	75		7	10.1007/s11368-017-1737-x	https://www.scopus.com/inward/record.url?eid=2-s2.0-85020745014&partnerID=40&md5=889dab5727c0d0320f56473cbdc1496f	Article	Final		Scopus	2-s2.0-85020745014	55661435500; 36971210800; 55723528800; 55614411200; 14041631700; 57204845855
cc	Moon, M., Seyednasrollah, B., Richardson, A.D., Friedl, M.A.	2021	Using time series of MODIS land surface phenology to model temperature and photoperiod controls on spring greenup in North American deciduous forests	1	Remote Sensing of Environment	260		112466				6	10.1016/j.rse.2021.112466	https://www.scopus.com/inward/record.url?eid=2-s2.0-85104652400&partnerID=40&md5=7865224df5b64b51ec88faeb64e6a230	Article	Final	All Open Access, Bronze	Scopus	2-s2.0-85104652400	56494158200; 55855328300; 7402534046; 7007018426
cc	Skwarska, J., Kaliński, A., Wawrzyniak, J., Bańbura, M., Glądalski, M., Markowski, M., Zieliński, P., Bańbura, A., Bańbura, J.	2015	Variation in egg sizes of pied flycatchers ficedula hypoleuca in central Poland: A long-term decreasing trend	1	Acta Ornithologica	50	1		85	94		6	10.3161/00016454AO2015.50.1.009	https://www.scopus.com/inward/record.url?eid=2-s2.0-84941067582&partnerID=40&md5=5018a1e261f2b83046a07793606796d8	Article	Final		Scopus	2-s2.0-84941067582	22036343300; 6701584091; 6506624758; 14719206800; 55090060500; 55091531700; 36877706000; 56825953200; 6701619620
cc	Domingos, C., Ferreira, V., Canhoto, C., Swan, C.	2015	Warming, and the presence of a dominant shredder, drive variation in decomposer communities in a mountain stream	1	Aquatic Sciences	77	1		129	140		7	10.1007/s00027-014-0378-z	https://www.scopus.com/inward/record.url?eid=2-s2.0-84922086238&partnerID=40&md5=0c715ed9c33753c5abc72c7f0c17d239	Article	Final	All Open Access, Green	Scopus	2-s2.0-84922086238	57209446265; 8564663900; 55888595300; 7006888369
land	Bergkamp, G.	1995	A hierarchical approach for desertification assessment	1	Environmental Monitoring and Assessment	37	44621		59	78		20	10.1007/BF00546880	https://www.scopus.com/inward/record.url?eid=2-s2.0-0029416162&partnerID=40&md5=4e6bfe15f47e531d1c6990f48b645b6c	Article	Final		Scopus	2-s2.0-0029416162	6603173605
land	Chuang, T.-F., Chang, Y.-H.	2013	A pilot study of using Artificial Neural Network on the climbing ability of Swinhoe's Frog	0	Ecological Engineering	58			255	261		4	10.1016/j.ecoleng.2013.06.034	https://www.scopus.com/inward/record.url?eid=2-s2.0-84880969990&partnerID=40&md5=10468a7d335a628c419f540affff2d9f	Article	Final		Scopus	2-s2.0-84880969990	15730312100; 23092897200
land	Blank, P.J., Williams, C.L., Sample, D.W., Meehan, T.D., Turner, M.G.	2016	Alternative scenarios of bioenergy crop production in an agricultural landscape and implications for bird communities	1	Ecological Applications	26	1		42	54		8	10.1890/14-1490.1/suppinfo	https://www.scopus.com/inward/record.url?eid=2-s2.0-84959455741&partnerID=40&md5=d9ee9d07d8ffaecdfe6127293beaacf2	Article	Final		Scopus	2-s2.0-84959455741	15755256200; 57212153524; 7003534205; 7006484719; 7403215651
land	Gugger, P.F., Liang, C.T., Sork, V.L., Hodgskiss, P., Wright, J.W.	2018	Applying landscape genomic tools to forest management and restoration of Hawaiian koa (Acacia koa) in a changing environment	1	Evolutionary Applications	11	2		231	242		31	10.1111/eva.12534	https://www.scopus.com/inward/record.url?eid=2-s2.0-85028937731&partnerID=40&md5=83e2fc3f9798bcf62dce87a025ac0759	Article	Final	All Open Access, Gold, Green	Scopus	2-s2.0-85028937731	24558671500; 57191577984; 6701587785; 6506924280; 55483272000
land	Tambe, S., Arrawatia, M.L., Sharma, N.	2011	Assessing the Priorities for Sustainable Forest Management in the Sikkim Himalaya, India: A Remote Sensing Based Approach	1	Journal of the Indian Society of Remote Sensing	39	4		555	564		9	10.1007/s12524-011-0110-6	https://www.scopus.com/inward/record.url?eid=2-s2.0-83655163924&partnerID=40&md5=40b8bbe76ffe4dc2a9de3ad9fcfc94d3	Article	Final		Scopus	2-s2.0-83655163924	35207095800; 6508004195; 36159812200
land	Loboda, T.V., Csiszar, I.A.	2007	Assessing the risk of ignition in the Russian Far East within a modeling framework of fire threat	1	Ecological Applications	17	3		791	805		31	10.1890/05-1476	https://www.scopus.com/inward/record.url?eid=2-s2.0-34247206611&partnerID=40&md5=6a37f3d510132a9eb0a987e369e970ca	Article	Final		Scopus	2-s2.0-34247206611	57203048222; 7005780974
land	Jones-Walters, L.	2008	Biodiversity in multifunctional landscapes	1	Journal for Nature Conservation	16	2		117	119		24	10.1016/j.jnc.2008.03.001	https://www.scopus.com/inward/record.url?eid=2-s2.0-43649093990&partnerID=40&md5=677b34329ed0eded72821e7183b7dd20	Article	Final		Scopus	2-s2.0-43649093990	22979833400
land	Gavin, M.C.	2004	Changes in forest use value through ecological succession and their implications for land management in the Peruvian Amazon	1	Conservation Biology	18	6		1562	1570		18	10.1111/j.1523-1739.2004.00241.x	https://www.scopus.com/inward/record.url?eid=2-s2.0-10644249277&partnerID=40&md5=fe584c9a908cb002b5465f05a572b4f7	Article	Final		Scopus	2-s2.0-10644249277	15047812600
land	Zhou, P., Wen, A.-B., Yan, D.-C., Shi, Z.-L., Guo, J., Ju, Z.-S., Zhang, Y.-L.	2014	Changes in land use and agricultural production structure before and after the implementation of Grain for Green Program in western China - taking two typical counties as examples	1	Journal of Mountain Science	11	2		526	534		11	10.1007/s11629-013-2369-2	https://www.scopus.com/inward/record.url?eid=2-s2.0-84901748920&partnerID=40&md5=90ac89cc9083fcd8d05419a29241364e	Article	Final		Scopus	2-s2.0-84901748920	53065089900; 7004010597; 35114191800; 39062107500; 55750033300; 56192381000; 56193212300
land	Liu, Y.-F., Zhang, J., Ma, Y., Shan, K., Jin, X.-H., Wang, J.-H.	2010	Changes of wetland landscape pattern in Eastern Yellow River Delta Nature Reserve from 1995 to 1999	1	Chinese Journal of Applied Ecology	21	11		2904	2911		8		https://www.scopus.com/inward/record.url?eid=2-s2.0-79951831263&partnerID=40&md5=3da6fde684e3ce8bbb6a3220f8db766a	Article	Final		Scopus	2-s2.0-79951831263	36453902500; 55963073000; 35220028600; 35223844100; 36453786800; 43861898900
land	Lovich, J.E., Yackulic, C.B., Freilich, J., Agha, M., Austin, M., Meyer, K.P., Arundel, T.R., Hansen, J., Vamstad, M.S., Root, S.A.	2014	Climatic variation and tortoise survival: Has a desert species met its match?	0	Biological Conservation	169			214	224		51	10.1016/j.biocon.2013.09.027	https://www.scopus.com/inward/record.url?eid=2-s2.0-84890145243&partnerID=40&md5=f206b717d55738d39f9e9a0dd74f5a73	Article	Final	All Open Access, Hybrid Gold	Scopus	2-s2.0-84890145243	6602093105; 6506472860; 6701428286; 55813230300; 55962218400; 7401793862; 49860949100; 55962842800; 36027117000; 55962742900
land	Ameyaw, L.K., Ettl, G.J., Leissle, K., Anim-Kwapong, G.J.	2018	Cocoa and climate change: Insights from smallholder cocoa producers in Ghana regarding challenges in implementing climate change mitigation strategies	1	Forests	9	12	742				13	10.3390/f9120742	https://www.scopus.com/inward/record.url?eid=2-s2.0-85057781845&partnerID=40&md5=9b6c6a7f705c47a27deb16866ea810e7	Article	Final	All Open Access, Gold, Green	Scopus	2-s2.0-85057781845	57193474105; 6602558132; 35620669600; 56341395500
land	Wu, Y., Zhao, X., Xi, Y., Liu, H., Li, C.	2019	Comprehensive evaluation and spatial-temporal changes of eco-environmental quality based on MODIS in Tibet during 2006-2016 | 基于MODIS的2006-2016年西藏生态质量综合评价及其时空变化	1	Dili Xuebao/Acta Geographica Sinica	74	7		1438	1449		12	10.11821/dlxb201907012	https://www.scopus.com/inward/record.url?eid=2-s2.0-85072276894&partnerID=40&md5=f9dbdfd54e89f14af25b2f3fbb413e47	Article	Final		Scopus	2-s2.0-85072276894	57223789024; 57211024611; 57209637990; 56861646400; 36069501900
land	Sánchez-Cuervo, A.M., Aide, T.M.	2013	Consequences of the Armed Conflict, Forced Human Displacement, and Land Abandonment on Forest Cover Change in Colombia: A Multi-scaled Analysis	1	Ecosystems	16	6		1052	1070		93	10.1007/s10021-013-9667-y	https://www.scopus.com/inward/record.url?eid=2-s2.0-84881555264&partnerID=40&md5=b0a94b93a0f75b1e47048223ca8b1a07	Article	Final		Scopus	2-s2.0-84881555264	37124887600; 7004375740
land	Lima-Ribeiro, M.S., Hortal, J., Varela, S., Diniz-Filho, J.A.F.	2014	Constraint envelope analyses of macroecological patterns reveal climatic effects on Pleistocene mammal extinctions	1	Quaternary Research (United States)	82	1		260	269		6	10.1016/j.yqres.2014.02.003	https://www.scopus.com/inward/record.url?eid=2-s2.0-84904046167&partnerID=40&md5=a690677081452687a1b0b7805847914a	Article	Final		Scopus	2-s2.0-84904046167	13003314500; 22937790400; 35068623900; 7004620621
land	Douglas-Mankin, K.R.	2018	Current research in land, water, and agroecosystems: ASABE journals 2017 year in review	1	Transactions of the ASABE	61	5		1639	1651		3	10.13031/trans.12821	https://www.scopus.com/inward/record.url?eid=2-s2.0-85055878578&partnerID=40&md5=4a598435efd22bcbc95a21d885ac2f5b	Article	Final	All Open Access, Bronze	Scopus	2-s2.0-85055878578	25936043700
land	Keith, D.A., Rodoreda, S., Bedward, M.	2010	Decadal change in wetland-woodland boundaries during the late 20th century reflects climatic trends	1	Global Change Biology	16	8		2300	2306		19	10.1111/j.1365-2486.2009.02072.x	https://www.scopus.com/inward/record.url?eid=2-s2.0-77955081307&partnerID=40&md5=e8169b14e60a49c2b0bd622e9dc5f4cb	Article	Final		Scopus	2-s2.0-77955081307	7102144937; 22938860100; 6602562800
land	Hernandez, R.R., Sandquist, D.R.	2011	Disturbance of biological soil crust increases emergence of exotic vascular plants in California sage scrub	1	Plant Ecology	212	10		1709	1721		41	10.1007/s11258-011-9943-x	https://www.scopus.com/inward/record.url?eid=2-s2.0-80052868781&partnerID=40&md5=2ddaac9862346ea7a8d139090abe2e46	Article	Final		Scopus	2-s2.0-80052868781	49661364800; 6701541059
land	Perry, L.G., Reynolds, L.V., Shafroth, P.B.	2018	Divergent effects of land-use, propagule pressure, and climate on woody riparian invasion	1	Biological Invasions	20	11		3271	3295		6	10.1007/s10530-018-1773-5	https://www.scopus.com/inward/record.url?eid=2-s2.0-85048507668&partnerID=40&md5=215baa60cf0e508e891e35a9b9014634	Article	Final		Scopus	2-s2.0-85048507668	7201503874; 18038388800; 6602486672
land	White, R.S.A., McHugh, P.A., McIntosh, A.R.	2016	Drought survival is a threshold function of habitat size and population density in a fish metapopulation	1	Global Change Biology	22	10		3341	3348		31	10.1111/gcb.13265	https://www.scopus.com/inward/record.url?eid=2-s2.0-85027920746&partnerID=40&md5=959e55775fa0b7187b3433bdef39634d	Article	Final		Scopus	2-s2.0-85027920746	56262318500; 8047789400; 7202722683
land	Midega, C.A.O., Wasonga, C.J., Hooper, A.M., Pickett, J.A., Khan, Z.R.	2017	Drought-tolerant Desmodium species effectively suppress parasitic striga weed and improve cereal grain yields in western Kenya	0	Crop Protection	98			94	101		27	10.1016/j.cropro.2017.03.018	https://www.scopus.com/inward/record.url?eid=2-s2.0-85016004471&partnerID=40&md5=8fbb851c0a1fc0164cb0b284d86d5b6a	Article	Final	All Open Access, Hybrid Gold, Green	Scopus	2-s2.0-85016004471	10142587200; 37082522400; 7101963430; 7101754379; 57202787229
land	Zeng, J., Shao, J., Xie, D.	2016	Dynamic changes of soil organic carbon for basic farmland and non-basic farmland of Dianjiang county in recent 30 years	1	Nongye Gongcheng Xuebao/Transactions of the Chinese Society of Agricultural Engineering	32	13		254	262		1	10.11975/j.issn.1002-6819.2016.13.036	https://www.scopus.com/inward/record.url?eid=2-s2.0-84975159395&partnerID=40&md5=8bf61db1c5bf644cd8a9913186384eff	Article	Final		Scopus	2-s2.0-84975159395	56381875300; 8603739900; 17136646200
land	Guteta, D., Abegaz, A.	2017	Dynamics of selected soil properties under four land uses in Arsamma watershed, Southwestern Ethiopian Highlands	1	Physical Geography	38	1		83	102		5	10.1080/02723646.2016.1251734	https://www.scopus.com/inward/record.url?eid=2-s2.0-84996525924&partnerID=40&md5=e185ed8508c3e012ee439f75fa166c76	Article	Final		Scopus	2-s2.0-84996525924	56922173600; 16067919000
land	Koci, J., Sidle, R.C., Kinsey-Henderson, A.E., Bartley, R., Wilkinson, S.N., Hawdon, A.A., Jarihani, B., Roth, C.H., Hogarth, L.	2020	Effect of reduced grazing pressure on sediment and nutrient yields in savanna rangeland streams draining to the Great Barrier Reef	1	Journal of Hydrology	582		124520				14	10.1016/j.jhydrol.2019.124520	https://www.scopus.com/inward/record.url?eid=2-s2.0-85077953182&partnerID=40&md5=e0a8c25f073fd40af6ebf8518084eaf5	Article	Final		Scopus	2-s2.0-85077953182	57190492239; 7006885391; 7801323194; 6601971030; 7202333537; 15029760400; 57193091511; 7203065899; 57211475484
land	Herrera, J.M., García, D.	2010	Effects of forest fragmentation on seed dispersal and seedling establishment in ornithochorous trees	1	Conservation Biology	24	4		1089	1098		81	10.1111/j.1523-1739.2010.01459.x	https://www.scopus.com/inward/record.url?eid=2-s2.0-77954715426&partnerID=40&md5=4a92680d9647607cd2e11449fc871bb0	Article	Final		Scopus	2-s2.0-77954715426	36175889100; 35746009700
land	Andriatsitohaina, B., Romero-Mujalli, D., Ramsay, M.S., Kiene, F., Rasoloharijaona, S., Rakotondravony, R., Lehman, S.M., Radespiel, U.	2020	Effects of habitat edges on vegetation structure and the vulnerable golden-brown mouse lemur (Microcebus ravelobensis) in northwestern Madagascar	1	BMC Ecology	20	1	69				6	10.1186/s12898-020-00337-z	https://www.scopus.com/inward/record.url?eid=2-s2.0-85097665156&partnerID=40&md5=830daa961ebc59e561407ab03ed671d4	Article	Final	All Open Access, Gold, Green	Scopus	2-s2.0-85097665156	57202967484; 57190877618; 56529029300; 57211452320; 16067307300; 24924009700; 7006169268; 6701565496
land	Herbert, J.A., Chakraborty, A., Naylor, L.W., Beatty, W.S., Krementz, D.G.	2018	Effects of landscape structure and temporal habitat dynamics on wintering mallard abundance	1	Landscape Ecology	33	8		1319	1334		10	10.1007/s10980-018-0671-7	https://www.scopus.com/inward/record.url?eid=2-s2.0-85049053100&partnerID=40&md5=68579b54da35c68c2b6af86eb5a5de2a	Article	Final		Scopus	2-s2.0-85049053100	57225734463; 37861020800; 55900855200; 36196054600; 7004263697
land	Chen, Y., Yuan, H.	2020	Evaluation of nine sub-daily soil moisture model products over China using high-resolution in situ observations	0	Journal of Hydrology	588		125054				16	10.1016/j.jhydrol.2020.125054	https://www.scopus.com/inward/record.url?eid=2-s2.0-85084638946&partnerID=40&md5=c32225cc631ad5531f74807dbdfb12fe	Article	Final		Scopus	2-s2.0-85084638946	57211522309; 16403715400
land	Selleron, G., Mezzadri-Centeno, T.	2008	Evaluation of prospective modelling methods: Fuzzy logics and cellular automaton applied to deforestation in Venezuela	1	Environmental Science and Engineering (Subseries: Environmental Science)		9783540684893		109	139			10.1007/978-3-540-68498-5_4	https://www.scopus.com/inward/record.url?eid=2-s2.0-85028894817&partnerID=40&md5=356fe3676cab646c87b17adc940fe686	Article	Final		Scopus	2-s2.0-85028894817	6508382354; 57191988399
land	Ndehedehe, C.E., Okwuashi, O., Ferreira, V.G., Agutu, N.O.	2018	Exploring evapotranspiration dynamics over Sub-Sahara Africa (2000–2014)	1	Environmental Monitoring and Assessment	190	7	400				14	10.1007/s10661-018-6780-6	https://www.scopus.com/inward/record.url?eid=2-s2.0-85048617072&partnerID=40&md5=6e8830908d100d58277fccac4c868c5d	Article	Final	All Open Access, Green	Scopus	2-s2.0-85048617072	56888830200; 35311837800; 23570708600; 56601330100
land	Le Tortorec, E., Helle, S., Suorsa, P., Sirkiä, P., Huhta, E., Nivala, V., Hakkarainen, H.	2012	Feather growth bars as a biomarker of habitat fragmentation in the Eurasian treecreeper	1	Ecological Indicators	15	1		72	75		6	10.1016/j.ecolind.2011.09.013	https://www.scopus.com/inward/record.url?eid=2-s2.0-81755178975&partnerID=40&md5=f422c13f27cd107b3ba1b8df4bc5fea8	Article	Final		Scopus	2-s2.0-81755178975	54401310900; 35608205200; 7801597831; 24923690800; 6701755284; 6507688774; 56229091700
land	Green, T.G.A., Seppelt, R.D., Brabyn, L.R., Beard, C., Türk, R., Lange, O.L.	2015	Flora and vegetation of Cape Hallett and vicinity, northern Victoria Land, Antarctica	1	Polar Biology	38	11		1825	1845		7	10.1007/s00300-015-1744-6	https://www.scopus.com/inward/record.url?eid=2-s2.0-84945482423&partnerID=40&md5=0b90351d7612aadb4773ecacfbff0ed7	Article	Final		Scopus	2-s2.0-84945482423	7401860205; 7003453479; 6603326066; 7102372103; 7006346853; 7006004554
land	Campos, I., Abrantes, N., Pereira, P., Micaelo, A.C., Vale, C., Keizer, J.J.	2019	Forest fires as potential triggers for production and mobilization of polycyclic aromatic hydrocarbons to the terrestrial ecosystem	0	Land Degradation and Development	30	18		2360	2370		19	10.1002/ldr.3427	https://www.scopus.com/inward/record.url?eid=2-s2.0-85071584418&partnerID=40&md5=fd5af5ad66ba624ca835715f275158e2	Article	Final		Scopus	2-s2.0-85071584418	55279703000; 57195138847; 55426290800; 55783408700; 7005266074; 7005301640
land	Kline, J.D., Alig, R.J., Garber-Yonts, B.	2004	Forestland social values and open space preservation	1	Journal of Forestry	102	8		39	45		23		https://www.scopus.com/inward/record.url?eid=2-s2.0-11144245044&partnerID=40&md5=35396b49b8f9f96890dc2dc393c6ffe3	Article	Final		Scopus	2-s2.0-11144245044	7201770151; 7005634849; 8775594800
land	Geraci, A., Raimondo, F.M., Troia, A.	2009	Genetic diversity and local population structure in Ambrosina bassii (Araceae, Ambrosineae), a Mediterranean relict species	0	Biochemical Systematics and Ecology	37	6		737	746		13	10.1016/j.bse.2009.12.002	https://www.scopus.com/inward/record.url?eid=2-s2.0-74149092563&partnerID=40&md5=a5ebb954866b874754d90f2747882a58	Article	Final		Scopus	2-s2.0-74149092563	12773963800; 8586351900; 15743278800
land	Jordan, G., Szucs, A.	2011	Geochemical landscape analysis: Development and application to the risk assessment of acid mine drainage. A Case study in central Sweden	1	Landscape Research	36	2		231	261		5	10.1080/01426397.2010.547569	https://www.scopus.com/inward/record.url?eid=2-s2.0-79952684449&partnerID=40&md5=6f3296c977db7523fb007e634b9827d8	Article	Final		Scopus	2-s2.0-79952684449	7202856511; 7006394248
land	Thomas, M.F.	2012	Geodiversity and Landscape Sensitivity: A Geomorphological Perspective	1	Scottish Geographical Journal	128	44654		195	210		22	10.1080/14702541.2012.725863	https://www.scopus.com/inward/record.url?eid=2-s2.0-84871011673&partnerID=40&md5=8a383c628b9d56e99a57dff704b10d1f	Article	Final		Scopus	2-s2.0-84871011673	7404756324
land	Unsworth, R.K.F., McKenzie, L.J., Collier, C.J., Cullen-Unsworth, L.C., Duarte, C.M., Eklöf, J.S., Jarvis, J.C., Jones, B.L., Nordlund, L.M.	2019	Global challenges for seagrass conservation	1	Ambio	48	8		801	815		114	10.1007/s13280-018-1115-y	https://www.scopus.com/inward/record.url?eid=2-s2.0-85056828634&partnerID=40&md5=bc7ffd0fcde66ca0a1b51b1b306f1960	Article	Final	All Open Access, Hybrid Gold, Green	Scopus	2-s2.0-85056828634	15849622400; 7005190449; 19640136700; 23570390600; 55636631300; 8632276700; 23392534400; 57114059000; 36940953100
land	Ceddia, M.G., Bardsley, N.O., Gomez-Y-Paloma, S., Sedlacek, S.	2014	Governance, agricultural intensification, and land sparing in tropical South America	1	Proceedings of the National Academy of Sciences of the United States of America	111	20		7242	7247		79	10.1073/pnas.1317967111	https://www.scopus.com/inward/record.url?eid=2-s2.0-84901044584&partnerID=40&md5=ecdc69a2d65b54bfe792953247d70516	Article	Final	All Open Access, Bronze, Green	Scopus	2-s2.0-84901044584	25821771500; 8454505600; 6507674703; 6701826097
land	Buczyński, P., Szlauer-ŁUkaszewska, A., Tończyk, G., Buczyńska, E.	2017	Groynes: A factor modifying the occurrence of dragonfly larvae (Odonata) on a large lowland river	1	Marine and Freshwater Research	68	9		1653	1663		12	10.1071/MF16217	https://www.scopus.com/inward/record.url?eid=2-s2.0-85028585597&partnerID=40&md5=53fa6f622c32f4374c6c31d50c7fd9ea	Article	Final		Scopus	2-s2.0-85028585597	12761058800; 22939331200; 6504315855; 55968758000
land	Faucher, B., Lacelle, D., Marsh, N.B., Fisher, D.A., Andersen, D.T.	2021	Ice-covered ponds in the Untersee Oasis (East Antarctica): Distribution, chemical composition, and trajectory under a warming climate	0	Arctic, Antarctic, and Alpine Research	53	1		324	339		1	10.1080/15230430.2021.2000566	https://www.scopus.com/inward/record.url?eid=2-s2.0-85120971306&partnerID=40&md5=b050f6ec3bb3c337d0d5119120d19dff	Article	Final	All Open Access, Gold	Scopus	2-s2.0-85120971306	57191756034; 6506955813; 57218272851; 7403342931; 7202231963
land	Griesser, M., Nystrand, M., Eggers, S., Ekman, J.	2007	Impact of forestry practices on fitness correlates and population productivity in an open-nesting bird species	1	Conservation Biology	21	3		767	774		42	10.1111/j.1523-1739.2007.00675.x	https://www.scopus.com/inward/record.url?eid=2-s2.0-34249098020&partnerID=40&md5=2ff0375a7c446380f13def5076ecdbbd	Article	Final		Scopus	2-s2.0-34249098020	6701834480; 15053448900; 7006021733; 56243314500
land	Sud, Y.C., Yang, R., Walker, G.K.	1996	Impact of in situ deforestation in Amazonia on the regional climate: General circulation model simulation study	1	Journal of Geophysical Research Atmospheres	101	D3		7095	7109		32	10.1029/95JD02754	https://www.scopus.com/inward/record.url?eid=2-s2.0-0030482834&partnerID=40&md5=5f4bb2caaa4c18d0d51a4ba8884de1af	Article	Final		Scopus	2-s2.0-0030482834	7004160106; 56304866600; 7402390191
land	Warren, M., Frolking, S., Dai, Z., Kurnianto, S.	2017	Impacts of land use, restoration, and climate change on tropical peat carbon stocks in the twenty-first century: implications for climate mitigation	1	Mitigation and Adaptation Strategies for Global Change	22	7		1041	1061		31	10.1007/s11027-016-9712-1	https://www.scopus.com/inward/record.url?eid=2-s2.0-84968677689&partnerID=40&md5=7abc7ff4f473a6d3f8701f36a661e3fa	Article	Final	All Open Access, Hybrid Gold, Green	Scopus	2-s2.0-84968677689	9042157700; 7004021287; 15919041700; 38561648200
land	Comte, I., Lucotte, M., Davidson, R., Reis De Carvalho, C.J., De Assis Oliveira, F., Rousseau, G.X.	2013	Impacts of land uses on mercury retention in long-time cultivated soils, brazilian amazon	1	Water, Air, and Soil Pollution	224	4	1515				6	10.1007/s11270-013-1515-3	https://www.scopus.com/inward/record.url?eid=2-s2.0-84875155124&partnerID=40&md5=4fbb0ed422630ac6b461d892429f02c9	Article	Final		Scopus	2-s2.0-84875155124	55185125400; 7004218639; 7401730794; 6507638498; 57222725480; 15030234700
land	Jensen, A.K., Uggeldahl, K.C., Jacobsen, B.H., Jensen, J.D., Hasler, B.	2019	Including aesthetic and recreational values in cost-effectiveness analyses of land use change based nitrogen abatement measures in Denmark	1	Journal of Environmental Management	240			384	393		8	10.1016/j.jenvman.2019.03.076	https://www.scopus.com/inward/record.url?eid=2-s2.0-85064173371&partnerID=40&md5=ebc5be8c1fd6411eb568b4556d97c690	Article	Final		Scopus	2-s2.0-85064173371	57203868405; 57191281428; 8606891300; 55456716300; 56233200700
land	Yu, L., Wu, Z., Du, Z., Zhang, H., Liu, Y.	2021	Insights on the roles of climate and human activities to vegetation degradation and restoration in Beijing-Tianjin sandstorm source region	1	Ecological Engineering	159		106105				10	10.1016/j.ecoleng.2020.106105	https://www.scopus.com/inward/record.url?eid=2-s2.0-85097166706&partnerID=40&md5=579ac068c88c478dae85b4d4909b16e6	Article	Final		Scopus	2-s2.0-85097166706	57204173215; 55278280200; 57116988400; 57219635426; 56178873000
land	Green, T.L., Kronenberg, J., Andersson, E., Elmqvist, T., Gómez-Baggethun, E.	2016	Insurance Value of Green Infrastructure in and Around Cities	0	Ecosystems	19	6		1051	1063		47	10.1007/s10021-016-9986-x	https://www.scopus.com/inward/record.url?eid=2-s2.0-84966714560&partnerID=40&md5=d73c5de45e3f22647cb371f5fd4aa56e	Article	Final	All Open Access, Hybrid Gold	Scopus	2-s2.0-84966714560	7401859547; 56284337400; 57208450315; 6701768312; 24175588700
land	Girvetz, E.H., Thorne, J.H., Berry, A.M., Jaeger, J.A.G.	2008	Integration of landscape fragmentation analysis into regional planning: A statewide multi-scale case study from California, USA	1	Landscape and Urban Planning	86	44654		205	218		130	10.1016/j.landurbplan.2008.02.007	https://www.scopus.com/inward/record.url?eid=2-s2.0-44349132055&partnerID=40&md5=f67f613c2931b0e40466ca4790ab6f92	Article	Final		Scopus	2-s2.0-44349132055	8725138300; 9738393100; 7202448196; 12782469400
land	Lomba, A., Bunce, R.G.H., Jongman, R.H.G., Moreira, F., Honrado, J.	2011	Interactions between abiotic filters, landscape structure and species traits as determinants of dairy farmland plant diversity	1	Landscape and Urban Planning	99	44654		248	258		16	10.1016/j.landurbplan.2010.09.005	https://www.scopus.com/inward/record.url?eid=2-s2.0-78651457746&partnerID=40&md5=05e44eef99e732dc276aa5269f886a9b	Article	Final		Scopus	2-s2.0-78651457746	8241417600; 7006526765; 55890185600; 55266517400; 8241417300
land	Depicker, A., Govers, G., Jacobs, L., Campforts, B., Uwihirwe, J., Dewitte, O.	2021	Interactions between deforestation, landscape rejuvenation, and shallow landslides in the North Tanganyika-Kivu rift region, Africa	1	Earth Surface Dynamics	9	3		445	462		5	10.5194/esurf-9-445-2021	https://www.scopus.com/inward/record.url?eid=2-s2.0-85107287084&partnerID=40&md5=a2eabbefb403d7aba32976504e637efb	Article	Final	All Open Access, Gold, Green	Scopus	2-s2.0-85107287084	57211977950; 7006708448; 56604664200; 56380543900; 57217306791; 55596956600
land	Sabattini, J.A.	2015	Land cover and land use changes of native forests categories: The case of the Atencio District, Argentina, in the period from 1984 to 2013	1	Forest Systems	24	2	e028				4	10.5424/fs/2015242-06680	https://www.scopus.com/inward/record.url?eid=2-s2.0-84940109431&partnerID=40&md5=07d917d4a21fb8ee9d3fa97f43c27d3f	Article	Final	All Open Access, Gold, Green	Scopus	2-s2.0-84940109431	56801804000
land	CHEN, Y.-F., LIU, Y.-S., WANG, J., YAN, J.-P., GUO, X.-D.	2009	Land Use Changes of an Aeolian-Loessial Soil Area in Northwest China: Implications for Ecological Restoration	1	Pedosphere	19	3		356	361		12	10.1016/S1002-0160(09)60126-0	https://www.scopus.com/inward/record.url?eid=2-s2.0-65549127118&partnerID=40&md5=cce6fe209a9fb33a36d12b658070c68a	Article	Final		Scopus	2-s2.0-65549127118	7601439503; 8395328700; 57206677218; 55467836600; 9336669100
land	Calvão, L.B., Juen, L., de Oliveira Junior, J.M.B., Batista, J.D., De Marco Júnior, P.	2018	Land use modifies Odonata diversity in streams of the Brazilian Cerrado	1	Journal of Insect Conservation	22	44717		675	685		32	10.1007/s10841-018-0093-5	https://www.scopus.com/inward/record.url?eid=2-s2.0-85054290666&partnerID=40&md5=4cba9fdb7b3f7ca20b4bb41fe0a5769e	Article	Final		Scopus	2-s2.0-85054290666	55788375100; 15845750000; 55851271100; 22949725200; 7006718539
land	Xie, G., Zhen, L., Yang, L., Guo, G.	2005	Landscape stability and its pattern transition in Jinghe watershed	1	Chinese Journal of Applied Ecology	16	9		1693	1698		3		https://www.scopus.com/inward/record.url?eid=2-s2.0-27744492081&partnerID=40&md5=c706c62b7ea97647149c455fb369f007	Article	Final		Scopus	2-s2.0-27744492081	7202981418; 7006681081; 57198987799; 10139583400
land	Ehrenburg, A., Baeyens, G.	1992	Landscape-ecological mapping as basis for management of the Amsterdam Waterwork Dunes	1	Coastal dunes. Proc. 3rd European dune congress, Galway, 1992				407	418				https://www.scopus.com/inward/record.url?eid=2-s2.0-0026442739&partnerID=40&md5=9572b3cd290397955c5d84b101cffdac	Article	Final		Scopus	2-s2.0-0026442739	16033301000; 6507205431
land	Brudvig, L.A., Damschen, E.I.	2011	Land-use history, historical connectivity, and land management interact to determine longleaf pine woodland understory richness and composition	1	Ecography	34	2		257	266		68	10.1111/j.1600-0587.2010.06381.x	https://www.scopus.com/inward/record.url?eid=2-s2.0-79953281744&partnerID=40&md5=5ee9de8222d6e15e621c5c430bcdd9f1	Article	Final		Scopus	2-s2.0-79953281744	10144523700; 6508365010
land	Kupfer, J.A., Franklin, S.B.	2009	Linking spatial pattern and ecological responses in human-modified landscapes: The effects of deforestation and forest fragmentation on biodiversity	1	Geography Compass	3	4		1331	1355		19	10.1111/j.1749-8198.2009.00245.x	https://www.scopus.com/inward/record.url?eid=2-s2.0-67949083632&partnerID=40&md5=df4a4f4651a0a82d1b7dbdaaa5d77338	Article	Final		Scopus	2-s2.0-67949083632	57204334424; 7202936896
land	Rindi, F., Gavio, B., Díaz-Tapia, P., Di Camillo, C.G., Romagnoli, T.	2020	Long-term changes in the benthic macroalgal flora of a coastal area affected by urban impacts (Conero Riviera, Mediterranean Sea)	1	Biodiversity and Conservation	29	7		2275	2295		8	10.1007/s10531-020-01973-z	https://www.scopus.com/inward/record.url?eid=2-s2.0-85083363581&partnerID=40&md5=8c612dd40f04bc2a96976dc5f027419a	Article	Final		Scopus	2-s2.0-85083363581	57207224905; 6506535183; 55642574700; 9236128000; 9744417800
land	Fitzgerald, T.M., van Stam, E., Nocera, J.J., Badzinski, D.S.	2014	Loss of nesting sites is not a primary factor limiting northern Chimney Swift populations	1	Population Ecology	56	3		507	512		11	10.1007/s10144-014-0433-6	https://www.scopus.com/inward/record.url?eid=2-s2.0-84903278234&partnerID=40&md5=aad2ebea7d2e809c0bb65f2ab7561263	Article	Final		Scopus	2-s2.0-84903278234	16024551100; 9132714900; 6603731173; 26026763500
land	Sauer, J., Domisch, S., Nowak, C., Haase, P.	2011	Low mountain ranges: Summit traps for montane freshwater species under climate change	1	Biodiversity and Conservation	20	13		3133	3146		53	10.1007/s10531-011-0140-y	https://www.scopus.com/inward/record.url?eid=2-s2.0-81255135915&partnerID=40&md5=64644e5cf1d283dfe5780d9869fdcb76	Article	Final		Scopus	2-s2.0-81255135915	35077373400; 39862910500; 15127938900; 36885695900
land	Riley, J.	2002	Mammals on the Sangihe and Talaud Islands, Indonesia, and the impact of hunting and habitat loss	1	ORYX	36	3		288	296		30	10.1017/S0030605302000510	https://www.scopus.com/inward/record.url?eid=2-s2.0-0142194800&partnerID=40&md5=ce5d001f14b3f4569c5d3e072f1b6fb4	Article	Final	All Open Access, Bronze	Scopus	2-s2.0-0142194800	7402484407
land	Hughes, A.C.	2017	Mapping priorities for conservation in Southeast Asia	1	Biological Conservation	209			395	405		47	10.1016/j.biocon.2017.03.007	https://www.scopus.com/inward/record.url?eid=2-s2.0-85015192765&partnerID=40&md5=9a56c758c4ce68477b9b703e4626ade1	Article	Final		Scopus	2-s2.0-85015192765	36720911700
land	Farella, N., Lucotte, M., Davidson, R., Daigle, S.	2006	Mercury release from deforested soils triggered by base cation enrichment	1	Science of the Total Environment	368	1		19	29		44	10.1016/j.scitotenv.2006.04.025	https://www.scopus.com/inward/record.url?eid=2-s2.0-33746620491&partnerID=40&md5=86087c064f2f4b6e67b56e744876ade0	Article	Final		Scopus	2-s2.0-33746620491	6603008051; 7004218639; 7401730794; 6602712455
land	Rizkalla, C.E., Moore, J.E., Swihart, R.K.	2009	Modeling patch occupancy: Relative performance of ecologically scaled landscape indices	1	Landscape Ecology	24	1		77	88		10	10.1007/s10980-008-9281-0	https://www.scopus.com/inward/record.url?eid=2-s2.0-58349107238&partnerID=40&md5=a4b5fd353c415adb73c0dc34c17f7d6c	Article	Final		Scopus	2-s2.0-58349107238	8982308500; 57209637692; 7004086189
land	Rauch, W., Urich, C., Bach, P.M., Rogers, B.C., de Haan, F.J., Brown, R.R., Mair, M., McCarthy, D.T., Kleidorfer, M., Sitzenfrei, R., Deletic, A.	2017	Modelling transitions in urban water systems	1	Water Research	126			501	514		41	10.1016/j.watres.2017.09.039	https://www.scopus.com/inward/record.url?eid=2-s2.0-85030830332&partnerID=40&md5=2339edeb67fd5f9abdc125a19bb49969	Article	Final		Scopus	2-s2.0-85030830332	12758697700; 36099411100; 35489935900; 56450157400; 24775886800; 26422021400; 45261394200; 56212123900; 22980428900; 35604679000; 6602509848
land	Zych, M., Stpiczyńska, M.	2012	Neither protogynous nor obligatory out-crossed: Pollination biology and breeding system of the European Red List Fritillaria meleagris L. (Liliaceae)	1	Plant Biology	14	2		285	294		21	10.1111/j.1438-8677.2011.00510.x	https://www.scopus.com/inward/record.url?eid=2-s2.0-84856744828&partnerID=40&md5=85ab2c6d2e2e8233be303aa08e64a354	Article	Final		Scopus	2-s2.0-84856744828	57202786664; 21735458200
land	García Antón, M., Franco Múgica, F., Maldonado, J., Morla Juaristi, C., Sainz Ollero, H.	1997	New data concerning the evolution of the vegetation in Lillo pinewood (Leon, Spain)	1	Journal of Biogeography	24	6		929	934		39	10.1046/j.1365-2699.1997.00181.x	https://www.scopus.com/inward/record.url?eid=2-s2.0-14444280357&partnerID=40&md5=733fb07a74b9e4c4deebe6bfd209fcd8	Article	Final		Scopus	2-s2.0-14444280357	6507265431; 7801414107; 57196818884; 56617565800; 6603494666
land	Silva, D.P., De Marco, P.	2014	No evidence of habitat loss affecting the orchid Bees Eulaema nigrita Lepeletier and Eufriesea auriceps friese (Apidae: Euglossini) in the Brazilian Cerrado Savanna	1	Neotropical Entomology	43	6		509	518		16	10.1007/s13744-014-0244-7	https://www.scopus.com/inward/record.url?eid=2-s2.0-84912021894&partnerID=40&md5=3d626c1fb1f59b598cbd9e874cfb9c8a	Article	Final		Scopus	2-s2.0-84912021894	55913670300; 7006718539
land	Rabanal, L.I., Kuehl, H.S., Mundry, R., Robbins, M.M., Boesch, C.	2010	Oil prospecting and its impact on large rainforest mammals in Loango National Park, Gabon	1	Biological Conservation	143	4		1017	1024		37	10.1016/j.biocon.2010.01.017	https://www.scopus.com/inward/record.url?eid=2-s2.0-77649234457&partnerID=40&md5=59e5cb55932a480cb03b55becdd035e9	Article	Final		Scopus	2-s2.0-77649234457	35765740500; 23469575000; 6507317611; 7202254249; 26642873000
land	Nowak, A., Hodson, A.	2015	On the biogeochemical response of a glacierized High Arctic watershed to climate change: Revealing patterns, processes and heterogeneity among micro-catchments	0	Hydrological Processes	29	6		1588	1603		14	10.1002/hyp.10263	https://www.scopus.com/inward/record.url?eid=2-s2.0-84923846395&partnerID=40&md5=475144474d7fa35b345006a8653658aa	Article	Final	All Open Access, Green	Scopus	2-s2.0-84923846395	56175899800; 24556330900
land	Henderson, R.C., Archer, E.K., Bouwes, B.A., Coles-Ritchie, M.C., Kershner, J.L.	2005	PACFISH/INFISH Biological Opinion (PIBO): Effectiveness monitoring program sevan-year status report 1998 through 2004	1	USDA Forest Service - General Technical Report RMRS-GTR		162 RMRS-GTR		1	20		5		https://www.scopus.com/inward/record.url?eid=2-s2.0-34247372627&partnerID=40&md5=a53aa95d3b47fc37e54df046f6697212	Article	Final		Scopus	2-s2.0-34247372627	55424866100; 16237877500; 53874502100; 16237968400; 7003458085
land	Morgado, R., Pedroso, R., Porto, M., Herrera, J.M., Rego, F., Moreira, F., Beja, P.	2021	Preserving wintering frugivorous birds in agro-ecosystems under land use change: Lessons from intensive and super-intensive olive orchards	1	Journal of Applied Ecology	58	12		2975	2986		4	10.1111/1365-2664.14029	https://www.scopus.com/inward/record.url?eid=2-s2.0-85116115863&partnerID=40&md5=b18e61374f94ee69bb00a8b749d22e38	Article	Final	All Open Access, Hybrid Gold, Green	Scopus	2-s2.0-85116115863	57197042845; 55255262700; 36183556900; 36175889100; 6701644918; 55266517400; 6602807125
land	Moncrieff, G.R., Slingsby, J.A., Le Maitre, D.C.	2021	Propagating uncertainty from catchment experiments to estimates of streamflow reduction by invasive alien plants in southwestern South Africa	1	Hydrological Processes	35	4	e14161				1	10.1002/hyp.14161	https://www.scopus.com/inward/record.url?eid=2-s2.0-85104972533&partnerID=40&md5=0a98d4de9d45140197132385b7ce22d1	Article	Final	All Open Access, Green	Scopus	2-s2.0-85104972533	25825194300; 14045904500; 6701679632
land	Chao, A., Colwell, R.K., Gotelli, N.J., Thorn, S.	2019	Proportional mixture of two rarefaction/extrapolation curves to forecast biodiversity changes under landscape transformation	1	Ecology Letters	22	11		1913	1922		8	10.1111/ele.13322	https://www.scopus.com/inward/record.url?eid=2-s2.0-85070743121&partnerID=40&md5=6bb03485aa56a0d54acf604cfb9d7af3	Article	Final		Scopus	2-s2.0-85070743121	7102703038; 7203000356; 7004412346; 56287682600
land	Copley, D., Fraser, D., Finlay, C.J.	1999	Purple Martins, Progne subis: A British Columbian success story	1	Canadian Field-Naturalist	113	2		226	229		5		https://www.scopus.com/inward/record.url?eid=2-s2.0-0033120667&partnerID=40&md5=3e8c5551515c5651303bdd6bfa537bd9	Article	Final		Scopus	2-s2.0-0033120667	57193721903; 26024679000; 35122730700
land	Yang, J., Li, S., Lu, H.	2019	Quantitative influence of land-use changes and urban expansion intensity on landscape pattern in Qingdao, China: Implications for urban sustainability	1	Sustainability (Switzerland)	11	21	6174				26	10.3390/su11216174	https://www.scopus.com/inward/record.url?eid=2-s2.0-85074848252&partnerID=40&md5=15608a1526084bac6ef6d5dfe796fb36	Article	Final	All Open Access, Gold, Green	Scopus	2-s2.0-85074848252	57211681389; 36106106300; 57190019109
land	Espeland, E.K., Sylvain, Z.A.	2019	Range size, local abundance and effect inform species descriptions at scales relevant for local conservation practice	1	Biodiversity and Conservation	28	4		909	920			10.1007/s10531-019-01701-2	https://www.scopus.com/inward/record.url?eid=2-s2.0-85061063381&partnerID=40&md5=1a0919cbc1f2269b24a0eb7f88d567f8	Article	Final		Scopus	2-s2.0-85061063381	8300761900; 16048525100
land	Wartmann, F.M., Stride, C.B., Kienast, F., Hunziker, M.	2021	Relating landscape ecological metrics with public survey data on perceived landscape quality and place attachment	1	Landscape Ecology	36	8		2367	2393		5	10.1007/s10980-021-01290-y	https://www.scopus.com/inward/record.url?eid=2-s2.0-85109289160&partnerID=40&md5=6ea3e5a9d37233390e638ebc8c05f1fc	Article	Final	All Open Access, Hybrid Gold, Green	Scopus	2-s2.0-85109289160	35331414700; 6602646940; 6701879014; 6701797579
land	Ota, M., Nagai, H., Koarashi, J.	2013	Root and dissolved organic carbon controls on subsurface soil carbon dynamics: A model approach	0	Journal of Geophysical Research: Biogeosciences	118	4		1646	1659		33	10.1002/2013JG002379	https://www.scopus.com/inward/record.url?eid=2-s2.0-84892925898&partnerID=40&md5=203bf4bca7f8da72fdf2c41764fdf779	Article	Final		Scopus	2-s2.0-84892925898	17435289500; 7403084001; 6602766278
land	Kotilínek, M., Těšitelová, T., Košnar, J., Fibich, P., Hemrová, L., Koutecký, P., Münzbergová, Z., Jersáková, J.	2020	Seed dispersal and realized gene flow of two forest orchids in a fragmented landscape	1	Plant Biology	22	3		522	532		5	10.1111/plb.13099	https://www.scopus.com/inward/record.url?eid=2-s2.0-85081727756&partnerID=40&md5=ee6c5a3fb3277355772ef0836405b470	Article	Final		Scopus	2-s2.0-85081727756	56523322400; 55367059200; 36165099100; 36522076500; 54781383700; 56382438000; 6602303405; 7801478622
land	Lohmann, D., Tietjen, B., Blaum, N., Joubert, D.F., Jeltsch, F.	2012	Shifting thresholds and changing degradation patterns: Climate change effects on the simulated long-term response of a semi-arid savanna to grazing	1	Journal of Applied Ecology	49	4		814	823		63	10.1111/j.1365-2664.2012.02157.x	https://www.scopus.com/inward/record.url?eid=2-s2.0-84864024309&partnerID=40&md5=80058f45ff64122bb3d3c700628c0f63	Article	Final		Scopus	2-s2.0-84864024309	55255652400; 55917671400; 9839069700; 24491948000; 7003385072
land	Kinyua, D., McGeoch, L.E., Georgiadis, N., Young, T.P.	2010	Short-Term and Long-Term Effects of Soil Ripping, Seeding, and Fertilization on the Restoration of a Tropical Rangeland	1	Restoration Ecology	18	SUPPL. 1		226	233		32	10.1111/j.1526-100X.2009.00594.x	https://www.scopus.com/inward/record.url?eid=2-s2.0-77956497016&partnerID=40&md5=2e87e1da6c7b0306b501a8bb4473bb87	Article	Final		Scopus	2-s2.0-77956497016	36684013500; 24528714700; 7003307127; 55755053200
land	Ferreira, M.L., de Souza, L.C., Conti, D.M., Quaresma, C.C., Tavares, A.R., da Silva, K.G., Kniess, C.T., de Camargo, P.B.	2018	Soil biodiversity in urban forests as a consequence of litterfall management: Implications for São Paulo's ecosystem services	1	Sustainability (Switzerland)	10	3	684				4	10.3390/su10030684	https://www.scopus.com/inward/record.url?eid=2-s2.0-85042795877&partnerID=40&md5=7a991281792df849eaa4f0487ded270f	Article	Final	All Open Access, Gold, Green	Scopus	2-s2.0-85042795877	35236946400; 57200989312; 57212484607; 57196007518; 16204196000; 57200625493; 6508007833; 7004416841
land	Tiwari, S.C., Sorokhaibam, S.S., Dkhar, M.S., Mishra, R.R.	2002	Soil degradation affects microbial biomass carbon and dehydogenase activity in humid tropical hilly forest soils	1	Asian Journal of Microbiology, Biotechnology and Environmental Sciences	4	1		143	148		3		https://www.scopus.com/inward/record.url?eid=2-s2.0-0038403934&partnerID=40&md5=27b72b64d7c1568f95fdd91b43e7dcb1	Article	Final		Scopus	2-s2.0-0038403934	57197202550; 6504333059; 6508231845; 7402648456
land	Zhang, W., Cheng, Z., Qiu, J., Park, E., Ran, L., Xie, X., Yang, X.	2021	Spatiotemporal changes in mulberry-dyke-fish ponds in the guangdong-Hong Kong-Macao greater bay area over the past 40 years	1	Water (Switzerland)	13	21	2953				1	10.3390/w13212953	https://www.scopus.com/inward/record.url?eid=2-s2.0-85117759835&partnerID=40&md5=d8c5b93870d08a764815d0e19cb26a06	Article	Final	All Open Access, Gold	Scopus	2-s2.0-85117759835	57222810079; 57310297800; 57218626920; 56088790300; 37012950100; 14032632700; 49962700500
land	Muster, S., Langer, M., Abnizova, A., Young, K.L., Boike, J.	2015	Spatio-temporal sensitivity of MODIS land surface temperature anomalies indicates high potential for large-scale land cover change detection in Arctic permafrost landscapes	1	Remote Sensing of Environment	168			1	12		50	10.1016/j.rse.2015.06.017	https://www.scopus.com/inward/record.url?eid=2-s2.0-84947233395&partnerID=40&md5=5586818a83e7e9f2c6ce4b92c96eef9d	Article	Final	All Open Access, Green	Scopus	2-s2.0-84947233395	36240952500; 35782988600; 25624725300; 7402601194; 6602826769
land	Fu, C., Li, Y., Zeng, L., Zhang, H., Tu, C., Zhou, Q., Xiong, K., Wu, J., Duarte, C.M., Christie, P., Luo, Y.	2021	Stocks and losses of soil organic carbon from Chinese vegetated coastal habitats	1	Global Change Biology	27	1		202	214		15	10.1111/gcb.15348	https://www.scopus.com/inward/record.url?eid=2-s2.0-85091504025&partnerID=40&md5=1e532774586e5653fd5996bbe840700f	Article	Final	All Open Access, Green	Scopus	2-s2.0-85091504025	57189391601; 57214962769; 55766285600; 57207482497; 57202854814; 57183364300; 57211951118; 7409254384; 55636631300; 55359801800; 55523486900
land	Smyser, T.J., Johnson, S.A., Page, L.K., Rhodes, O.E.	2012	Synergistic stressors and the dilemma of conservation in a multivariate world: A case study in Allegheny woodrats	1	Animal Conservation	15	2		205	213		15	10.1111/j.1469-1795.2011.00505.x	https://www.scopus.com/inward/record.url?eid=2-s2.0-84859225903&partnerID=40&md5=d1cf3b3436f3ca12768d9e372eed19fd	Article	Final	All Open Access, Green	Scopus	2-s2.0-84859225903	35333324200; 55466658900; 7103091840; 56260140300
land	Vilisics, F., Elek, Z., Lövei, G.L.	2018	Temporal patterns in the activity density and sex ratio of isopods (Oniscidea, Isopoda) along an urbanization gradient in Denmark	1	Community Ecology	19	1		84	92			10.1556/168.2018.19.1.9	https://www.scopus.com/inward/record.url?eid=2-s2.0-85048937563&partnerID=40&md5=db22133062d5e1d648953422775608b7	Article	Final	All Open Access, Green	Scopus	2-s2.0-85048937563	10041485500; 6506817761; 6603880506
land	Dool, S.E., Puechmaille, S.J., Kelleher, C., McAney, K., Teeling, E.C.	2016	The Effects of Human-Mediated Habitat Fragmentation on a Sedentary Woodland-Associated Species (Rhinolophus hipposideros) at Its Range Margin	1	Acta Chiropterologica	18	2		377	393		13	10.3161/15081109ACC2016.18.2.006	https://www.scopus.com/inward/record.url?eid=2-s2.0-84997079629&partnerID=40&md5=f27edb5bbc3217984ed3eebe394b4371	Article	Final		Scopus	2-s2.0-84997079629	55805030300; 12645631200; 57189989693; 14325670200; 6603452240
land	Li, H., Zhao, Y., Zheng, F.	2020	The framework of an agricultural land-use decision support system based on ecological environmental constraints	1	Science of the Total Environment	717		137149				16	10.1016/j.scitotenv.2020.137149	https://www.scopus.com/inward/record.url?eid=2-s2.0-85079242293&partnerID=40&md5=4f98ce592564cb6a0a225f6ff8e038b7	Article	Final		Scopus	2-s2.0-85079242293	56430055100; 56529828400; 57195350136
land	Howard, P.	1998	The history of ecological marginalization in Chiapas	1	Environmental History	3	3		357	377		8	10.2307/3985184	https://www.scopus.com/inward/record.url?eid=2-s2.0-0032411817&partnerID=40&md5=0a971a4293d64c7d5567af03af603602	Article	Final		Scopus	2-s2.0-0032411817	35122702600
land	Zuberogoitia, I., Zalewska, H., Zabala, J., Zalewski, A.	2013	The impact of river fragmentation on the population persistence of native and alien mink: An ecological trap for the endangered European mink	1	Biodiversity and Conservation	22	1		169	186		8	10.1007/s10531-012-0410-3	https://www.scopus.com/inward/record.url?eid=2-s2.0-84871498682&partnerID=40&md5=af9bee859a12ca3e88e5a7629486ca69	Article	Final	All Open Access, Hybrid Gold	Scopus	2-s2.0-84871498682	6603409180; 6602742246; 7003982004; 7005141197
land	Liu, Z., He, C., Wu, J.	2016	The relationship between habitat loss and fragmentation during urbanization: An empirical evaluation from 16 world cities	1	PLoS ONE	11	4	e0154613				85	10.1371/journal.pone.0154613	https://www.scopus.com/inward/record.url?eid=2-s2.0-84966455197&partnerID=40&md5=07b6a3776826d6c7debea1819e7511db	Article	Final	All Open Access, Gold, Green	Scopus	2-s2.0-84966455197	55714798200; 7402284848; 54080586800
land	Mannan, A., Yongxiang, F., Khan, T.U., Nizami, S.M., Mukete, B., Ahmad, A., Amara, U., Liu, J., Muhammad, M.W.	2021	Urban growth patterns and forest carbon dynamics in the metropolitan twin cities of islamabad and rawalpindi, Pakistan	1	Sustainability (Switzerland)	13	22	12842					10.3390/su132212842	https://www.scopus.com/inward/record.url?eid=2-s2.0-85119579938&partnerID=40&md5=427abe972dc0425df5720e6f0c637773	Article	Final	All Open Access, Gold, Green	Scopus	2-s2.0-85119579938	57201319943; 57205715034; 57204781342; 24544478500; 57212762254; 56201095100; 37018027600; 57060207600; 57221590240
land	Sweeney, S., Jurek, M., Bednar, M.	2007	Using place names to interpret former floodplain connectivity in the Morava River, Czech Republic	1	Landscape Ecology	22	7		1007	1018		18	10.1007/s10980-007-9085-7	https://www.scopus.com/inward/record.url?eid=2-s2.0-34547147912&partnerID=40&md5=320380f511ecfc274129e54cf8911a03	Article	Final		Scopus	2-s2.0-34547147912	7102671997; 7003530060; 17345168300
land	Chambers, J.C., Beck, J.L., Campbell, S., Carlson, J., Christiansen, T.J., Clause, K.J., Dinkins, J.B., Doherty, K.E., Griffin, K.A., Havlina, D.W., Henke, K.F., Hennig, J.D., Kurth, L.L., Maestas, J.D., Manning, M., Mayer, K.E., Mealor, B.A., McCarthy, C., Perea, M.A., Pyke, D.A.	2016	Using resilience and resistance concepts to manage threats to sagebrush ecosystems, gunnison sage-grouse, and greater sage-grouse in their eastern range: A strategic multi-scale approach	1	USDA Forest Service - General Technical Report RMRS-GTR	2016	356		1	152		11		https://www.scopus.com/inward/record.url?eid=2-s2.0-85009823691&partnerID=40&md5=59499fbef8513fccb34cf40ef24c7bd1	Article	Final		Scopus	2-s2.0-85009823691	7402475966; 9840707900; 37760953600; 37071843200; 7006282803; 55344693600; 36452668200; 22033926300; 57192986493; 57192989829; 57192989852; 57192986851; 6603910821; 6508152778; 55919259500; 57192986792; 6507700591; 14041986800; 57192985596; 36091903600
land	Finér, L., Zverev, V., Palviainen, M., Romanis, T., Kozlov, M.V.	2019	Variation in fine root biomass along a 1000 km long latitudinal climatic gradient in mixed boreal forests of North-East Europe	1	Forest Ecology and Management	432			649	655		16	10.1016/j.foreco.2018.09.060	https://www.scopus.com/inward/record.url?eid=2-s2.0-85054455873&partnerID=40&md5=ef8fd1a8172f975c0e8dfb872bc919aa	Article	Final		Scopus	2-s2.0-85054455873	7003876057; 16302851900; 55979310900; 56550039100; 55538935300
land	Wienhold, B.J., Vigil, M.F., Hendrickson, J.R., Derner, J.D.	2018	Vulnerability of crops and croplands in the US Northern Plains to predicted climate change	1	Climatic Change	146	44593		219	230		19	10.1007/s10584-017-1989-x	https://www.scopus.com/inward/record.url?eid=2-s2.0-85019890848&partnerID=40&md5=d5594b13ed2ffb7e737122e095c88245	Article	Final	All Open Access, Green	Scopus	2-s2.0-85019890848	56020568200; 57206382532; 57203198400; 6602194424
nis	Stefani, F., Leoni, B., Marieni, A., Garibaldi, L.	2010	A new record of Craspedacusta sowerbii, Lankester 1880 (Cnidaria, Limnomedusae) in Northern Italy	1	Journal of Limnology	69	1		12			18	10.3274/JL10-69-1-N1	https://www.scopus.com/inward/record.url?eid=2-s2.0-70849087628&partnerID=40&md5=000e6c3317ec1628d1694b7080aa3e7a	Article	Final		Scopus	2-s2.0-70849087628	57220193620; 8951332100; 6504396772; 7006228937
nis	Krull, C.R., Waipara, N.W., Choquenot, D., Burns, B.R., Gormley, A.M., Stanley, M.C.	2013	Absence of evidence is not evidence of absence: Feral pigs as vectors of soil-borne pathogens	1	Austral Ecology	38	5		534	542		17	10.1111/j.1442-9993.2012.02444.x	https://www.scopus.com/inward/record.url?eid=2-s2.0-84880331094&partnerID=40&md5=461d3c87f174acf55013336d0d3978d6	Article	Final		Scopus	2-s2.0-84880331094	35621798200; 15038503900; 7004148444; 7201855200; 6506189292; 7202498726
nis	Kuzmina, T.A., Lisitsyna, O.I., Lyons, E.T., Spraker, T.R., Tolliver, S.C.	2012	Acanthocephalans in northern fur seals (Callorhinus ursinus) and a harbor seal (Phoca vitulina) on St. Paul Island, Alaska	0	Parasitology Research	111	3		1049	1058		13	10.1007/s00436-012-2930-x	https://www.scopus.com/inward/record.url?eid=2-s2.0-84866071076&partnerID=40&md5=f9a87afaff580831a40ce11abd17bb6e	Article	Final		Scopus	2-s2.0-84866071076	8508192900; 38662667500; 16166855200; 7003865469; 7005601386
nis	Pienkowski, T., Williams, S., McLaren, K., Wilson, B., Hockley, N.	2015	Alien invasions and livelihoods: Economic benefits of invasive Australian Red Claw crayfish in Jamaica	1	Ecological Economics	112			68	77		23	10.1016/j.ecolecon.2015.02.012	https://www.scopus.com/inward/record.url?eid=2-s2.0-84923096727&partnerID=40&md5=938836cc83c00feba03271641aff2fb5	Article	Final	All Open Access, Green	Scopus	2-s2.0-84923096727	56521250700; 53878944900; 7005781278; 7403562501; 8853696800
nis	Maggiora, R., Saccani, M., Milanesio, D., Porporato, M.	2019	An Innovative Harmonic Radar to Track Flying Insects: the Case of Vespa velutina	0	Scientific Reports	9	1	11964				33	10.1038/s41598-019-48511-8	https://www.scopus.com/inward/record.url?eid=2-s2.0-85070831893&partnerID=40&md5=911211ddb3f7c14598b28e47794a773b	Article	Final	All Open Access, Gold, Green	Scopus	2-s2.0-85070831893	6602124119; 57151119100; 14031791700; 36020945200
nis	Meusnier, I., Valero, M., Olsen, J.L., Stam, W.T.	2004	Analysis of rDNA ITS1 indels in Caulerpa taxifolia (Chlorophyta) supports a derived, incipient species status for the invasive strain	1	European Journal of Phycology	39	1		83	92		46	10.1080/09670260310001646531	https://www.scopus.com/inward/record.url?eid=2-s2.0-1642343934&partnerID=40&md5=311c78eb1f8f8745c20aa90467b1ed68	Article	Final	All Open Access, Bronze	Scopus	2-s2.0-1642343934	6506297888; 57213170512; 7403255589; 7006182642
nis	Koutsikos, N., Vardakas, L., Kalantzi, O.-I., Zogaris, S.	2021	Article patterns of spatial overlap between non-indigenous and critically endangered freshwater fishes from a mediterranean biodiversity hotspot†	1	Diversity	13	6	233				2	10.3390/d13060233	https://www.scopus.com/inward/record.url?eid=2-s2.0-85107888577&partnerID=40&md5=4b961542af3aa99af89cb37f00fb6f74	Article	Final	All Open Access, Gold, Green	Scopus	2-s2.0-85107888577	37081279200; 35436479400; 6507906754; 12141818600
nis	Chapman, J.I., Perry, K.L., McEwan, R.W.	2012	Changing flora of an old-growth mesophytic forest: Previously undetected taxa and first appearance of non-native invasive species	1	Journal of the Torrey Botanical Society	139	2		206	210		6	10.3159/TORREY-D-11-00085.1	https://www.scopus.com/inward/record.url?eid=2-s2.0-84864703934&partnerID=40&md5=6d09af9880e989364af3ed8f4fc9d492	Article	Final		Scopus	2-s2.0-84864703934	55329897500; 55329456400; 8638436200
nis	Helm, A., Zobel, M., Moles, A.T., Szava-Kovats, R., Pärtel, M.	2015	Characteristic and derived diversity: Implementing the species pool concept to quantify conservation condition of habitats	1	Diversity and Distributions	21	6		711	721		35	10.1111/ddi.12285	https://www.scopus.com/inward/record.url?eid=2-s2.0-84924564978&partnerID=40&md5=4d6c40a0dc859a9095bb5bc2071cf59d	Article	Final		Scopus	2-s2.0-84924564978	7003879609; 24785660000; 7006587740; 6506544998; 6701389712
nis	Santoiemma, G., Battisti, A., Gusella, G., Cortese, G., Tosi, L., Gilioli, G., Sperandio, G., Ciampitti, M., Cavagna, B., Mori, N.	2021	Chemical control of Popillia japonica adults on high-value crops and landscape plants of northern Italy	1	Crop Protection	150		105808				1	10.1016/j.cropro.2021.105808	https://www.scopus.com/inward/record.url?eid=2-s2.0-85113459815&partnerID=40&md5=be72a23c046aae4730b6cf8b9ece2e10	Article	Final	All Open Access, Hybrid Gold, Green	Scopus	2-s2.0-85113459815	57185707200; 7005376329; 57231450300; 7004346454; 57231921400; 55967272300; 57195464499; 15750226600; 29067682700; 7402511727
nis	Bell, D.A., Kovach, R.P., Muhlfeld, C.C., Al-Chokhachy, R., Cline, T.J., Whited, D.C., Schmetterling, D.A., Lukacs, P.M., Whiteley, A.R.	2021	Climate change and expanding invasive species drive widespread declines of native trout in the northern Rocky Mountains, USA	1	Science Advances	7	52	eabj5471				4	10.1126/sciadv.abj5471	https://www.scopus.com/inward/record.url?eid=2-s2.0-85122037195&partnerID=40&md5=f886ece99e211ac476e580f231f64cd5	Article	Final	All Open Access, Green	Scopus	2-s2.0-85122037195	57195987424; 36135550900; 6602958349; 11440640300; 41561110800; 6602640115; 6602570834; 6603556054; 25631313800
nis	Hartshorn, J.A., Coyle, D.R.	2021	Comparative Meta-analysis Effects of Nonnative Ants (Hymenoptera: Formicidae), Ground Beetles (Coleoptera: Carabidae), and Bark and Ambrosia Beetles (Coleoptera: Curculionidae) on Native Confamilials	1	Environmental Entomology	50	3		622	632			10.1093/ee/nvab017	https://www.scopus.com/inward/record.url?eid=2-s2.0-85108582778&partnerID=40&md5=2d2901efac9f6130417cfbc91cf3b8d2	Article	Final		Scopus	2-s2.0-85108582778	56708358000; 7102318854
nis	Hayes, W.E., Walker, L.R., Powell, E.A.	2009	Competitive abilities of Tamarix aphylla in southern Nevada	1	Plant Ecology	202	1		159	167		18	10.1007/s11258-008-9569-9	https://www.scopus.com/inward/record.url?eid=2-s2.0-63949084589&partnerID=40&md5=04a6ec1cd3f4c41a04c2f9ca087dfb2e	Article	Final		Scopus	2-s2.0-63949084589	36808135800; 7402361326; 7102407872
nis	Boddy, N.C., McIntosh, A.R.	2021	Could spatial heterogeneity in flow disturbance drive temporal stability of native–invasive species co-occurrence in riverscapes?	1	Freshwater Biology	66	5		902	913			10.1111/fwb.13685	https://www.scopus.com/inward/record.url?eid=2-s2.0-85100485124&partnerID=40&md5=5c230eb18bf275a186be232e83db5fa4	Article	Final		Scopus	2-s2.0-85100485124	57192384786; 7202722683
nis	Vye, S.R., Dick, J.T.A., Emmerson, M.C., O'Connor, N.E.	2018	Cumulative effects of an invasive species and nutrient enrichment on rock pool communities	1	Marine Ecology Progress Series	594			39	50		4	10.3354/meps12529	https://www.scopus.com/inward/record.url?eid=2-s2.0-85046021590&partnerID=40&md5=1703301fd1aa19571d5a3328a8286197	Article	Final	All Open Access, Green	Scopus	2-s2.0-85046021590	56469718100; 7201749438; 6701485176; 23020094600
nis	Gonzalez Mateu, M., Baldwin, A.H., Maul, J.E., Yarwood, S.A.	2020	Dark septate endophyte improves salt tolerance of native and invasive lineages of Phragmites australis	1	ISME Journal	14	8		1943	1954		24	10.1038/s41396-020-0654-y	https://www.scopus.com/inward/record.url?eid=2-s2.0-85084159792&partnerID=40&md5=ce22e4f2546e56b4b49a76a32bd548a9	Article	Final	All Open Access, Hybrid Gold, Green	Scopus	2-s2.0-85084159792	57188966981; 7202822206; 8779764600; 34871105000
nis	Cobb, R.C., Orwig, D.A., Currie, S.	2006	Decomposition of green foliage in eastern hemlock forests of southern New England impacted by hemlock woolly adelgid infestations	1	Canadian Journal of Forest Research	36	5		1331	1341		38	10.1139/X06-012	https://www.scopus.com/inward/record.url?eid=2-s2.0-33746530616&partnerID=40&md5=6f22b6ed51f74b0a7e4d505ce1bd8c91	Article	Final		Scopus	2-s2.0-33746530616	8644781400; 7003826192; 36953735400
nis	Royo, A.A., Stanovick, J.S.	2019	Deer browsing overwhelms extended leaf phenology benefits: A test case with Rubus allegheniensis and a recalcitrant hay-scented fern layer	1	Forest Ecology and Management	448			294	299		3	10.1016/j.foreco.2019.06.019	https://www.scopus.com/inward/record.url?eid=2-s2.0-85067411985&partnerID=40&md5=7538ab8e4474cd0f59967e5802bdcb2c	Article	Final		Scopus	2-s2.0-85067411985	8875980200; 6506532497
nis	McCallum, E.S., Marentette, J.R., Schiller, C., Jindal, S., Empringham, K., Marsh-Rollo, S., Pettitt-Wade, H., Koops, M.A., Fisk, A.T., Balshine, S.	2017	Diet and foraging of Round Goby (Neogobius melanostomus) in a contaminated harbour	1	Aquatic Ecosystem Health and Management	20	3		252	264		4	10.1080/14634988.2016.1254468	https://www.scopus.com/inward/record.url?eid=2-s2.0-85029375524&partnerID=40&md5=8398368ba7bc5145f6011830a65551dc	Article	Final		Scopus	2-s2.0-85029375524	55614863500; 23667803500; 57195627595; 56938022200; 57195625094; 33068122400; 43461888700; 6603895391; 7006248240; 6603032012
nis	Wang, C., Wu, B., Jiang, K., Zhou, J.	2018	Differences in functional traits between invasive and native Amaranthus species under simulated acid deposition with a gradient of pH levels	1	Acta Oecologica	89			32	37		16	10.1016/j.actao.2018.04.006	https://www.scopus.com/inward/record.url?eid=2-s2.0-85046796398&partnerID=40&md5=7ca80ed8e44693c1d7b649a8b70f4f07	Article	Final		Scopus	2-s2.0-85046796398	36495963300; 57200110424; 57193675514; 57191733658
nis	Stals, R., Prinsloo, G.	2007	Discovery of an alien invasive, predatory insect in South Africa: The multicoloured Asian ladybird beetle, Harmonia axyridis (Pallas) (Coleoptera: Coccinellidae)	1	South African Journal of Science	103	44654		123	126		35		https://www.scopus.com/inward/record.url?eid=2-s2.0-34548610178&partnerID=40&md5=53e765e106a20f8c1168ab745cc39240	Article	Final		Scopus	2-s2.0-34548610178	21740071700; 57190307840
nis	Louppe, V., Lalis, A., Abdelkrim, J., Baron, J., Bed’Hom, B., Becker, A.A.M.J., Catzeflis, F., Lorvelec, O., Zieger, U., Veron, G.	2021	Dispersal history of a globally introduced carnivore, the small Indian mongoose Urva auropunctata, with an emphasis on the Caribbean region	1	Biological Invasions	23	8		2573	2590			10.1007/s10530-021-02523-6	https://www.scopus.com/inward/record.url?eid=2-s2.0-85105152360&partnerID=40&md5=627fd415a9c49231338c2a1f6722184c	Article	Final		Scopus	2-s2.0-85105152360	57193059667; 15136229600; 16318774500; 57216530504; 23570344600; 54911716300; 7003940520; 6602795055; 55371801200; 6603354336
nis	Fonseca da Silva, J.	2015	Dynamics of novel forests of Castilla elastica in Puerto Rico: From species to ecosystems	1	Ecology and Evolution	5	16		3299	3311		3	10.1002/ece3.1578	https://www.scopus.com/inward/record.url?eid=2-s2.0-84939470689&partnerID=40&md5=011af273a6b34405671fef78328ba2f4	Article	Final	All Open Access, Gold, Green	Scopus	2-s2.0-84939470689	55734400500
nis	Ho, C.-Y., Tsai, M.-Y., Huang, Y.-L., Kao, W.-Y.	2016	Ecophysiological factors contributing to the invasion of Panicum maximum into native Miscanthus sinensis grassland in Taiwan	1	Weed Research	56	1		69	77		5	10.1111/wre.12186	https://www.scopus.com/inward/record.url?eid=2-s2.0-84954363707&partnerID=40&md5=1674ef7fc1ebbe4827ec8957ec62d775	Article	Final		Scopus	2-s2.0-84954363707	56970190300; 36467300700; 55600915600; 35310786600
nis	Ha, G., Williams, S.L.	2018	Eelgrass community dominated by native omnivores in Bodega Bay, California, USA	1	Bulletin of Marine Science	94	4		1333	1353		3	10.5343/bms.2017.1091	https://www.scopus.com/inward/record.url?eid=2-s2.0-85055033509&partnerID=40&md5=34df3204f0d21f031a398984043df31f	Article	Final		Scopus	2-s2.0-85055033509	56305188200; 55871121844
nis	Gandiaga, S., Volin, J.C., Kruger, E.L., Kitajima, K.	2009	Effects of hydrology on the growth and physiology of an invasive exotic, Lygodium microphyllum (Old World climbing fern)	1	Weed Research	49	3		283	290		9	10.1111/j.1365-3180.2009.00698.x	https://www.scopus.com/inward/record.url?eid=2-s2.0-65849343520&partnerID=40&md5=379dc927d8a9848abfc7bad56e6e5fcd	Article	Final		Scopus	2-s2.0-65849343520	26631758200; 6701376478; 7103053003; 7202338687
nis	Norling, P., Lindegarth, M., Lindegarth, S., Strand, A˚.	2015	Effects of live and post-mortem shell structures of invasive Pacific oysters and native blue mussels on macrofauna and fish	1	Marine Ecology Progress Series	518			123	138		20	10.3354/meps11044	https://www.scopus.com/inward/record.url?eid=2-s2.0-84920654066&partnerID=40&md5=31fb609ba1feadb3803593a7ae1097cc	Article	Final		Scopus	2-s2.0-84920654066	23467277000; 6701842506; 24478312800; 7004533152
nis	Danne, A., Thomson, L.J., Sharley, D.J., Penfold, C.M., Hoffmann, A.A.	2010	Effects of native grass cover crops on beneficial and pest invertebrates in Australian vineyards	1	Environmental Entomology	39	3		970	978		67	10.1603/EN09144	https://www.scopus.com/inward/record.url?eid=2-s2.0-77953159013&partnerID=40&md5=f9baa494cbbb8e6f39f7ab97d585c322	Article	Final		Scopus	2-s2.0-77953159013	57199604231; 7102611783; 6504654350; 7004524098; 7401903027
nis	Delanoy, L., Archibold, O.W.	2007	Efficacy of control measures for European buckthorn (Rhamnus cathartica L.) in Saskatchewan	1	Environmental Management	40	4		709	718		16	10.1007/s00267-006-0409-1	https://www.scopus.com/inward/record.url?eid=2-s2.0-34648833270&partnerID=40&md5=738b1d261de921b1802bbff0c68f9b1d	Article	Final		Scopus	2-s2.0-34648833270	6506334987; 6701757786
nis	Brown, L.E., Céréghino, R., Compin, A.	2009	Endemic freshwater invertebrates from southern France: Diversity, distribution and conservation implications	1	Biological Conservation	142	11		2613	2619		30	10.1016/j.biocon.2009.06.009	https://www.scopus.com/inward/record.url?eid=2-s2.0-69349103974&partnerID=40&md5=0abaa43fe32ce3583f137b56b54d8137	Article	Final		Scopus	2-s2.0-69349103974	55386674600; 6603814620; 6506200039
nis	Tererai, F., Gaertner, M., Jacobs, S.M., Richardson, D.M.	2013	Eucalyptus invasions in riparian forests: Effects on native vegetation community diversity, stand structure and composition	1	Forest Ecology and Management	297			84	93		57	10.1016/j.foreco.2013.02.016	https://www.scopus.com/inward/record.url?eid=2-s2.0-84875506900&partnerID=40&md5=f0c2ceb582786cfc5b89a6e41830eb7a	Article	Final		Scopus	2-s2.0-84875506900	55633319600; 8945482200; 23111026200; 7403444596
nis	Liu, S., Walshe, T., Long, G., Cook, D.	2012	Evaluation of Potential Responses to Invasive Non-Native Species with Structured Decision Making	1	Conservation Biology	26	3		539	546		19	10.1111/j.1523-1739.2012.01843.x	https://www.scopus.com/inward/record.url?eid=2-s2.0-84861186441&partnerID=40&md5=28074482d883a8ac420fdab081d0bba3	Article	Final		Scopus	2-s2.0-84861186441	26651346600; 8102627300; 36939819400; 23024243700
nis	Hanslowe, E.B., Duquesnel, J.G., Snow, R.W., Falk, B.G., Yackel Adams, A.A., Metzger, E.F., Collier, M.A.M., Reed, R.N.	2018	Exotic predators may threaten another island ecosystem: A comprehensive assessment of python and boa reports from the Florida keys	1	Management of Biological Invasions	9	3		369	377		6	10.3391/mbi.2018.9.3.18	https://www.scopus.com/inward/record.url?eid=2-s2.0-85053615599&partnerID=40&md5=1d822601e3aab2752cc572e746ee2eec	Article	Final	All Open Access, Gold, Green	Scopus	2-s2.0-85053615599	57192892643; 57197818725; 23482654300; 42161259500; 6505782863; 57190964321; 57192887792; 7401921827
nis	Dröke, Y., Rödder, D.	2017	Feeding ecology of the invasive gecko species Hemidactylus mabouia (Moreau de Jonnès, 1818) (Sauria: Gekkonidae) in São Sebastião (Brazil)	1	Bonn Zoological Bulletin	66	1		85	93		1		https://www.scopus.com/inward/record.url?eid=2-s2.0-85020424112&partnerID=40&md5=43955ba586c41d0914daf5fc5971b1ff	Article	Final		Scopus	2-s2.0-85020424112	57194492248; 24468909800
nis	Tiemann, J.S., Haponski, A.E., Douglass, S.A., Lee, T., Cummings, K.S., Davis, M.A., Ó Foighil, D.	2017	First record of a putative novel invasive Corbicula lineage discovered in the Illinois River, Illinois, USA	1	BioInvasions Records	6	2		159	166		16	10.3391/bir.2017.6.2.12	https://www.scopus.com/inward/record.url?eid=2-s2.0-85018731036&partnerID=40&md5=5b954933935e414e1eec070d015bcc06	Article	Final	All Open Access, Gold, Green	Scopus	2-s2.0-85018731036	56212005300; 24821980700; 56583937800; 7501438845; 7102839785; 56437106300; 6603863816
nis	Evariste, L., Auffret, M., Audonnet, S., Geffard, A., David, E., Brousseau, P., Fournier, M., Betoulle, S.	2016	Functional features of hemocyte subpopulations of the invasive mollusk species Dreissena polymorpha	1	Fish and Shellfish Immunology	56			144	154		24	10.1016/j.fsi.2016.06.054	https://www.scopus.com/inward/record.url?eid=2-s2.0-84978375305&partnerID=40&md5=4f01815b5bf44741d38233fadcbcc425	Article	Final		Scopus	2-s2.0-84978375305	56426951600; 6603625082; 6506823140; 6602654661; 7101678161; 7004458570; 7201869932; 6603402298
nis	Aschehoug, E.T., Callaway, R.M., Newcombe, G., Tharayil, N., Chen, S.	2014	Fungal endophyte increases the allelopathic effects of an invasive forb	1	Oecologia	175	1		285	291		46	10.1007/s00442-014-2891-0	https://www.scopus.com/inward/record.url?eid=2-s2.0-84901406483&partnerID=40&md5=391608abd3177434984f85f7590e595f	Article	Final		Scopus	2-s2.0-84901406483	6508104721; 7006942837; 7006417107; 57225813945; 37030691200
nis	Stojanovic, D., Olah, G., Webb, M., Peakall, R., Heinsohn, R.	2018	Genetic evidence confirms severe extinction risk for critically endangered swift parrots: implications for conservation management	1	Animal Conservation	21	4		313	323		13	10.1111/acv.12394	https://www.scopus.com/inward/record.url?eid=2-s2.0-85051287578&partnerID=40&md5=4970d82b8d13aea29dc35848dc86d347	Article	Final	All Open Access, Bronze	Scopus	2-s2.0-85051287578	57205093073; 55573082200; 55341604700; 7004701632; 7004031481
nis	Tiberio, F.C.S., Sampaio-e-Silva, T.A., Dodonov, P., Garcia, V.A., Silva Mato, D.M.	2012	Germination and allometry of the native palm tree euterpe edulis compared to the introduced e. oleracea and their hybrids in Atlantic rainforest | The Ecology of Regeneration In Plant _net Germinação e alometria de euterpe edulis comparadas à palmeira introduzida euterpe oleracea e seus híbridos na floresta Atlântica	1	Brazilian Journal of Biology	72	4		955	962		7	10.1590/S1519-69842012000500025	https://www.scopus.com/inward/record.url?eid=2-s2.0-84872399892&partnerID=40&md5=7961cee0ff60b0090ca19e869c33c631	Article	Final	All Open Access, Gold, Green	Scopus	2-s2.0-84872399892	55557915600; 26535046800; 42861100200; 33467549400; 55557906200
nis	Feis, M.E., Goedknegt, M.A., Arzul, I., Chenuil, A., Boon, O., Gottschalck, L., Kondo, Y., Ohtsuka, S., Shama, L.N.S., Thieltges, D.W., Wegner, K.M., Luttikhuizen, P.C.	2019	Global invasion genetics of two parasitic copepods infecting marine bivalves	0	Scientific Reports	9	1	12730				4	10.1038/s41598-019-48928-1	https://www.scopus.com/inward/record.url?eid=2-s2.0-85071773592&partnerID=40&md5=da16aff585636874d25d14eae168cc5f	Article	Final	All Open Access, Gold, Green	Scopus	2-s2.0-85071773592	56505611000; 56780454000; 57203007966; 6601929850; 57210898634; 57210894160; 56345948300; 35498559300; 12143080500; 6506801456; 7005480180; 56505310200
nis	Patterson, C.R., Seddon, P.J., Wilson, D.J., van Heezik, Y.	2021	Habitat-specific densities of urban brushtail possums	1	New Zealand Journal of Ecology	45	2	3450					10.20418/nzjecol.45.27	https://www.scopus.com/inward/record.url?eid=2-s2.0-85122068549&partnerID=40&md5=f988d2b459074a485f8d145115e8a0ed	Article	Final		Scopus	2-s2.0-85122068549	57393058000; 7006419523; 57203312483; 7003411007
nis	Zhu, Y., Fu, S., Liu, H., Wang, Z., Chen, H.Y.H.	2019	Heat stress tolerance determines the survival and growth of introduced Canadian sugar maple in subtropical China	1	Tree Physiology	39	3		417	426		1	10.1093/treephys/tpy098	https://www.scopus.com/inward/record.url?eid=2-s2.0-85064848350&partnerID=40&md5=3b18fa86e2c7ec1e97916e0e5ef5175f	Article	Final		Scopus	2-s2.0-85064848350	57208443118; 7402732640; 55251807900; 57201729632; 8562009700
nis	Smith-Tripp, S., Griffith, A., Pasquarella, V.J., Matthes, J.H.	2021	Impacts of a regional multiyear insect defoliation event on growing-season runoff ratios and instantaneous streamflow characteristics	1	Ecohydrology	14	7	e2332					10.1002/eco.2332	https://www.scopus.com/inward/record.url?eid=2-s2.0-85111499960&partnerID=40&md5=b52eb098df754eb3bc50956590a0d913	Article	Final		Scopus	2-s2.0-85111499960	57226429112; 16047542000; 48761793900; 56336860400
nis	Bustamante, R.O., Badano, E.I., Pickett, S.T.A.	2012	Impacts of land use change on seed removal patterns of native and exotic species in a forest landscape	1	Community Ecology	13	2		171	177		4	10.1556/ComEc.13.2012.2.6	https://www.scopus.com/inward/record.url?eid=2-s2.0-84875696233&partnerID=40&md5=b7748e0b3b3f1c69fcd62dbb4689c0e9	Article	Final		Scopus	2-s2.0-84875696233	7003448609; 6603310238; 7004916681
nis	Yam, R.S.W., Fan, Y.-T., Wang, T.-T.	2016	Importance of macrophyte quality in determining life-history traits of the apple snails pomacea canaliculata: Implications for bottom-up management of an invasive herbivorous pest in constructed wetlands	1	International Journal of Environmental Research and Public Health	13	3	248				16	10.3390/ijerph13030248	https://www.scopus.com/inward/record.url?eid=2-s2.0-84975745421&partnerID=40&md5=d275d0e195bb7cac08eedb20ba57f968	Article	Final	All Open Access, Gold, Green	Scopus	2-s2.0-84975745421	43461978200; 57189897913; 57164123500
nis	Hunt Jr., E.R., Gillham, J.H., Daughtry, C.S.T.	2010	Improving potential geographic distribution models for invasive plants by remote sensing	1	Rangeland Ecology and Management	63	5		505	513		8	10.2111/REM-D-09-00137.1	https://www.scopus.com/inward/record.url?eid=2-s2.0-77957220222&partnerID=40&md5=105a4f8f99d11dc48180efae4566740b	Article	Final	All Open Access, Green	Scopus	2-s2.0-77957220222	57203255509; 7006506840; 7005954897
nis	Russell, J.C., Mackay, J.W.B., Abdelkrim, J.	2009	Insular pest control within a metapopulation context	1	Biological Conservation	142	7		1404	1410		29	10.1016/j.biocon.2009.01.032	https://www.scopus.com/inward/record.url?eid=2-s2.0-67349083981&partnerID=40&md5=bc699c60fbea15ea780b8bbdf2eeb39e	Article	Final		Scopus	2-s2.0-67349083981	55262735500; 24281790600; 16318774500
nis	Daskalov, G.M., Mamedov, E.V.	2007	Integrated fisheries assessment and possible causes for the collapse of anchovy kilka in the Caspian Sea	1	ICES Journal of Marine Science	64	3		503	511		48	10.1093/icesjms/fsl047	https://www.scopus.com/inward/record.url?eid=2-s2.0-34447557947&partnerID=40&md5=04b7c1a069ca2560fb1da50fe5119749	Article	Final		Scopus	2-s2.0-34447557947	6603078836; 15065668000
nis	Chefaoui, R.M., Serebryakova, A., Engelen, A.H., Viard, F., Serrão, E.A.	2019	Integrating reproductive phenology in ecological niche models changed the predicted future ranges of a marine invader	1	Diversity and Distributions	25	5		688	700		18	10.1111/ddi.12910	https://www.scopus.com/inward/record.url?eid=2-s2.0-85064818099&partnerID=40&md5=bb24c34fc8aee35c2e5f6edcc25d039b	Article	Final	All Open Access, Gold, Green	Scopus	2-s2.0-85064818099	8636216500; 57201425165; 6701622770; 57204281476; 7004093604
nis	Jandová, K., Dostál, P., Cajthaml, T., Kameník, Z.	2015	Intraspecific variability in allelopathy of Heracleum mantegazzianum is linked to the metabolic profile of root exudates	1	Annals of Botany	115	5		821	831		19	10.1093/aob/mcu265	https://www.scopus.com/inward/record.url?eid=2-s2.0-84927133383&partnerID=40&md5=600c79ae0bf9886d84072f350ba5f5e0	Article	Final	All Open Access, Bronze, Green	Scopus	2-s2.0-84927133383	57221726451; 35263762700; 6601942737; 25960107700
nis	Seitz, A.	1991	Introductory remarks: population biology, the scientific interface to species conservation	0	Species conservation: a population-biological approach				1	13		2	10.1007/978-3-0348-6426-8_1	https://www.scopus.com/inward/record.url?eid=2-s2.0-0026363673&partnerID=40&md5=b5119e0d051a947e425513994569b05f	Article	Final		Scopus	2-s2.0-0026363673	7006821343
nis	Demon, I., Haccou, P., van den Bosch, F.	2007	Introgression of resistance genes between populations: A model study of insecticide resistance in Bemisia tabaci	1	Theoretical Population Biology	72	2		292	304		7	10.1016/j.tpb.2007.06.005	https://www.scopus.com/inward/record.url?eid=2-s2.0-34547653536&partnerID=40&md5=fddad3790f91dfc5a1c8b00c8b29f99a	Article	Final		Scopus	2-s2.0-34547653536	18433286700; 6603840743; 7006104932
nis	Muhlfeld, C.C., Kovach, R.P., Jones, L.A., Al-Chokhachy, R., Boyer, M.C., Leary, R.F., Lowe, W.H., Luikart, G., Allendorf, F.W.	2014	Invasive hybridization in a threatened species is accelerated by climate change	1	Nature Climate Change	4	7		620	624		171	10.1038/nclimate2252	https://www.scopus.com/inward/record.url?eid=2-s2.0-84903449356&partnerID=40&md5=a77652b5beeeec28ba64f641ad7672ec	Article	Final		Scopus	2-s2.0-84903449356	6602958349; 36135550900; 55353309900; 11440640300; 9334574400; 7102861735; 7102817264; 57204344670; 7006030514
nis	Meyer, W.M., Cowie, R.H.	2010	Invasive temperate species are a threat to tropical island biodiversity	1	Biotropica	42	6		732	738		23	10.1111/j.1744-7429.2010.00629.x	https://www.scopus.com/inward/record.url?eid=2-s2.0-78149252306&partnerID=40&md5=c5919987d917c7ebf73a918233608ff2	Article	Final		Scopus	2-s2.0-78149252306	24169602500; 7102938560
nis	Kumar, R., Pandit, P., Kumar, D., Patel, Z., Pandya, L., Kumar, M., Joshi, C., Joshi, M.	2021	Landfill microbiome harbour plastic degrading genes: A metagenomic study of solid waste dumping site of Gujarat, India	0	Science of the Total Environment	779		146184				6	10.1016/j.scitotenv.2021.146184	https://www.scopus.com/inward/record.url?eid=2-s2.0-85102804910&partnerID=40&md5=cf470792e08c4af21afb5cefcb404aec	Article	Final		Scopus	2-s2.0-85102804910	56366069600; 57193848814; 57221540582; 57215611148; 57221339095; 55456390100; 7103126197; 55485236300
nis	Klein, D.R., Shulski, M.	2009	Lichen recovery following heavy grazing by reindeer delayed by climate warming	1	Ambio	38	1		11	16		19	10.1579/0044-7447-38.1.11	https://www.scopus.com/inward/record.url?eid=2-s2.0-61449127306&partnerID=40&md5=352a79aeab192e33ec44d6c201f32746	Article	Final	All Open Access, Green	Scopus	2-s2.0-61449127306	7402360780; 6507046956
nis	Paalme, T., Torn, K., Martin, G., Kotta, I., Suursaar, Ü.	2020	Littoral Benthic Communities under Effect of Heat Wave and Upwelling Events in the Ne Baltic Sea	1	Journal of Coastal Research	95	sp1		133	137		3	10.2112/SI95-026.1	https://www.scopus.com/inward/record.url?eid=2-s2.0-85085516110&partnerID=40&md5=5d713ee2410775a9885ab7cd3190a8ec	Article	Final		Scopus	2-s2.0-85085516110	6701767122; 6603202883; 7404675217; 7801460474; 6601983981
nis	Darling, J.A., Martinson, J., Pagenkopp Lohan, K.M., Carney, K.J., Pilgrim, E., Banerji, A., Holzer, K.K., Ruiz, G.M.	2020	Metabarcoding quantifies differences in accumulation of ballast water borne biodiversity among three port systems in the United States	1	Science of the Total Environment	749		141456				3	10.1016/j.scitotenv.2020.141456	https://www.scopus.com/inward/record.url?eid=2-s2.0-85089728724&partnerID=40&md5=244fce26da805da8b3523f9474d508c0	Article	Final	All Open Access, Hybrid Gold, Green	Scopus	2-s2.0-85089728724	57195139105; 16407386000; 55062407400; 56921674100; 6506354802; 36146701200; 55894053900; 7101628728
nis	Trumbo, D.R., Epstein, B., Hohenlohe, P.A., Alford, R.A., Schwarzkopf, L., Storfer, A.	2016	Mixed population genomics support for the central marginal hypothesis across the invasive range of the cane toad (Rhinella marina) in Australia	1	Molecular ecology	25	17		4161	4176		22	10.1111/mec.13754	https://www.scopus.com/inward/record.url?eid=2-s2.0-85027926984&partnerID=40&md5=555352546a3b43bde8c40de1a4d11beb	Article	Final	All Open Access, Green	Scopus	2-s2.0-85027926984	54080480600; 55042958200; 6603133542; 7005665956; 6603946682; 6603789071
nis	Tesfaye, G., Wolff, M.	2018	Modeling trophic interactions and the impact of an introduced exotic carp species in the Rift Valley Lake Koka, Ethiopia	1	Ecological Modelling	378			26	36		9	10.1016/j.ecolmodel.2018.04.003	https://www.scopus.com/inward/record.url?eid=2-s2.0-85045404698&partnerID=40&md5=02e76c1f3620c90f3bb26d6a088e87c8	Article	Final		Scopus	2-s2.0-85045404698	56201700500; 7403304576
nis	Miller, S.D., Russell, J.C., Macinnes, H.E., Abdelkrim, J., Fewster, R.M.	2010	Multiple paternity in wild populations of invasive Rattus species	1	New Zealand Journal of Ecology	34	3		360	363		12		https://www.scopus.com/inward/record.url?eid=2-s2.0-77957173068&partnerID=40&md5=0e2531552568550819bfbcf8e7ed3d93	Article	Final		Scopus	2-s2.0-77957173068	37047588400; 55262735500; 36098237400; 16318774500; 6602697446
nis	Hashim, N.R., Hughes, F., Bayliss-Smith, T.	2010	Non-native species in floodplain secondary forests in peninsular Malaysia	1	EnvironmentAsia	3	SPECIAL ISSUE		43	49		2		https://www.scopus.com/inward/record.url?eid=2-s2.0-76849102791&partnerID=40&md5=8c63b3764bd5570fdf8c3fd993a619d7	Article	Final		Scopus	2-s2.0-76849102791	35344747400; 8894898400; 6602838970
nis	Wingfield, M.J., Garnas, J.R., Hajek, A., Hurley, B.P., de Beer, Z.W., Taerum, S.J.	2016	Novel and co-evolved associations between insects and microorganisms as drivers of forest pestilence	1	Biological Invasions	18	4		1045	1056		61	10.1007/s10530-016-1084-7	https://www.scopus.com/inward/record.url?eid=2-s2.0-84958746161&partnerID=40&md5=d6e2b5a4fa4e7249f444ae0b876e7473	Article	Final	All Open Access, Green	Scopus	2-s2.0-84958746161	7102265584; 55500403500; 7006436517; 8636397700; 56381260700; 17347301800
nis	Mccracken, A., Bainard, J.D., Miller, M.C., Husband, B.C.	2013	Pathways of introduction of the invasive aquatic plant Cabomba caroliniana	1	Ecology and Evolution	3	6		1427	1439		13	10.1002/ece3.530	https://www.scopus.com/inward/record.url?eid=2-s2.0-84886294408&partnerID=40&md5=380f8616a549b47e01fda37fd0a4ca8f	Article	Final	All Open Access, Gold, Green	Scopus	2-s2.0-84886294408	35794805400; 36198047900; 55899360900; 7003473709
nis	Davies, K.W.	2011	Plant community diversity and native plant abundance decline with increasing abundance of an exotic annual grass	1	Oecologia	167	2		481	491		92	10.1007/s00442-011-1992-2	https://www.scopus.com/inward/record.url?eid=2-s2.0-85027926648&partnerID=40&md5=495d76d5fcdc3e02352d671ac61dd4ad	Article	Final		Scopus	2-s2.0-85027926648	57203178147
nis	Buynevich, I.V., DamuŠyte, A., Bitinas, A., Olenin, S., Mažeika, J., Petrošiu, R.	2011	Pontic-Baltic pathways for invasive aquatic species: Geoarchaeological implications	1	Special Paper of the Geological Society of America	473			189	196		7	10.1130/2011.2473(12)	https://www.scopus.com/inward/record.url?eid=2-s2.0-79960104297&partnerID=40&md5=7ce64fee4093e1c515c3f26d639dddca	Article	Final		Scopus	2-s2.0-79960104297	56044760300; 8833368500; 6603170076; 56056164800; 15045041100; 42561827200
nis	Holsbeek, G., Jooris, R.	2010	Potential impact of genome exclusion by alien species in the hybridogenetic water frogs (Pelophylax esculentus complex)	1	Biological Invasions	12	1		1	13		36	10.1007/s10530-009-9427-2	https://www.scopus.com/inward/record.url?eid=2-s2.0-59649126292&partnerID=40&md5=d71430a14b696055c91d5bc632ca6994	Article	Final		Scopus	2-s2.0-59649126292	25652710000; 35725831800
nis	Wang, Y., Li, Q., Wang, H., Wen, X., Yang, F., Ma, Z., Liu, Y., Sun, X., Yu, G.	2011	Precipitation frequency controls interannual variation of soil respiration by affecting soil respiration by affecting soilmoisture in a subtropical forest plantation	1	Canadian Journal of Forest Research	41	9		1897	1906		45	10.1139/x11-105	https://www.scopus.com/inward/record.url?eid=2-s2.0-80052243583&partnerID=40&md5=23d4c7df102053934cb31c48a83ab631	Article	Final		Scopus	2-s2.0-80052243583	56119485200; 7405860828; 36015780400; 15729641400; 57214194231; 15846432900; 15729159100; 57214289652; 55807480400
nis	Monaco, C.J., Porporato, E.M.D., Lathlean, J.A., Tagliarolo, M., Sarà, G., McQuaid, C.D.	2019	Predicting the performance of cosmopolitan species: dynamic energy budget model skill drops across large spatial scales	1	Marine Biology	166	2	14				9	10.1007/s00227-018-3462-4	https://www.scopus.com/inward/record.url?eid=2-s2.0-85059738606&partnerID=40&md5=b7fcb1fe15b54e8b015209320d385266	Article	Final	All Open Access, Green	Scopus	2-s2.0-85059738606	36126594100; 35485039900; 36442627800; 55362546900; 7003679368; 7005808952
nis	Estes, A.M., Hearn, D.J., Burrack, H.J., Rempoulakis, P., Pierson, E.A.	2012	Prevalence of candidatus erwinia dacicola in wild and laboratory olive fruit fly populations and across developmental stages	0	Environmental Entomology	41	2		265	274		44	10.1603/EN11245	https://www.scopus.com/inward/record.url?eid=2-s2.0-84859728908&partnerID=40&md5=ecc28c5a31f71035d4e06f502afa18b8	Article	Final		Scopus	2-s2.0-84859728908	7003883060; 8901845200; 57203441898; 35311798100; 7006635430
nis	Szitár, K., Ónodi, G., Somay, L., Pándi, I., Kucs, P., Kröel-Dulay, G.	2014	Recovery of inland sand dune grasslands following the removal of alien pine plantation	1	Biological Conservation	171			52	60		19	10.1016/j.biocon.2014.01.021	https://www.scopus.com/inward/record.url?eid=2-s2.0-84893490314&partnerID=40&md5=71c7e34305442dea30fb2bf5aea366be	Article	Final		Scopus	2-s2.0-84893490314	36471145400; 16679788300; 55826135200; 23397742500; 56025849400; 23008689300
nis	Manrique, R., Gutiérrez, J.R., Holmgren, M., Squeo, F.A.	2007	Reduced herbivory during simulated ENSO rainy events increases native herbaceous plants in semiarid Chile	1	Plant Ecology	191	1		21	31		9	10.1007/s11258-006-9211-7	https://www.scopus.com/inward/record.url?eid=2-s2.0-34250209859&partnerID=40&md5=de88968c2b397b774876cff7f97a429d	Article	Final		Scopus	2-s2.0-34250209859	16481301600; 7401653234; 7003678030; 6507048631
nis	Lázaro-Lobo, A., Lucardi, R.D., Ramirez‐Reyes, C., Ervin, G.N.	2021	Region-wide assessment of fine-scale associations between invasive plants and forest regeneration	1	Forest Ecology and Management	483		118930				7	10.1016/j.foreco.2021.118930	https://www.scopus.com/inward/record.url?eid=2-s2.0-85099521071&partnerID=40&md5=477b8f877e98938570d51e964fde4cff	Article	Final	All Open Access, Bronze	Scopus	2-s2.0-85099521071	57193086075; 56029686500; 56387520200; 7003520904
nis	Romano, A.J., Therrell, M., Schoof, J., Gibson, D.J.	2013	Response of non-native invasive plants to large scale wind damage	1	Natural Areas Journal	33	3		307	315		2	10.3375/043.033.0309	https://www.scopus.com/inward/record.url?eid=2-s2.0-84881168774&partnerID=40&md5=ba5c2b99cacebcc546e16540bde1bb96	Article	Final		Scopus	2-s2.0-84881168774	55814337700; 6602847144; 8079327900; 56276857500
nis	Yang, W., Yan, Y., Jiang, F., Leng, X., Cheng, X., An, S.	2016	Response of the soil microbial community composition and biomass to a short-term Spartina alterniflora invasion in a coastal wetland of eastern China	1	Plant and Soil	408	44593		443	456		37	10.1007/s11104-016-2941-y	https://www.scopus.com/inward/record.url?eid=2-s2.0-84992116497&partnerID=40&md5=01b3f440cc2b2fdbd1ffaa9d27691b75	Article	Final		Scopus	2-s2.0-84992116497	55899797700; 23568961800; 57191620059; 8687784300; 54405359200; 7203025443
nis	Darrah, A.J., van Riper, C.	2018	Riparian bird density decline in response to biocontrol of Tamarix from riparian ecosystems along the Dolores River in SW Colorado, USA	1	Biological Invasions	20	3		709	720		8	10.1007/s10530-017-1569-z	https://www.scopus.com/inward/record.url?eid=2-s2.0-85031401813&partnerID=40&md5=f23149956fea7e4a4b3b59cdca4dfde0	Article	Final		Scopus	2-s2.0-85031401813	14035256600; 7003743795
nis	Dunkell, D.O., Bruland, G.L., Evensen, C.I., Litton, C.M.	2011	Runoff, sediment transport, and effects of feral pig (sus scrofa) exclusion in a forested Hawaiian Watershed	1	Pacific Science	65	2		175	194		25	10.2984/65.2.175	https://www.scopus.com/inward/record.url?eid=2-s2.0-79954481985&partnerID=40&md5=f867131cbfa7dcb2ee86942dda7130f3	Article	Final		Scopus	2-s2.0-79954481985	37039286600; 6506914717; 6602338634; 35617775100
nis	Dalling, J.W., Davis, A.S., Schutte, B.J., Elizabeth Arnold, A.	2011	Seed survival in soil: Interacting effects of predation, dormancy and the soil microbial community	0	Journal of Ecology	99	1		89	95		187	10.1111/j.1365-2745.2010.01739.x	https://www.scopus.com/inward/record.url?eid=2-s2.0-78650392236&partnerID=40&md5=b61c1996ff3d6544d7f4c8d8e9d2a4f7	Article	Final		Scopus	2-s2.0-78650392236	7003357337; 8698438700; 24477985700; 7201370843
nis	Baxter-Gilbert, J., Riley, J.L., Wagener, C., Mohanty, N.P., Measey, J.	2020	Shrinking before our isles: The rapid expression of insular dwarfism in two invasive populations of guttural toad (Sclerophrys gutturalis): Insular Dwarfism in an Invasive Toad	1	Biology Letters	16	11	20200651				4	10.1098/rsbl.2020.0651rsbl20200651	https://www.scopus.com/inward/record.url?eid=2-s2.0-85096348063&partnerID=40&md5=1f8cb61b3a3530cedfac521494a4fa75	Article	Final		Scopus	2-s2.0-85096348063	56582563100; 55929204300; 57217136467; 56921669900; 57221738690
nis	Nasrollahzadeh, H.S., Din, Z.B., Foong, S.Y., Makhlough, A.	2008	Spatial and temporal distribution of macronutrients and phytoplankton before and after the invasion of the ctenophore, Mnemiopsis leidyi, in the Southern Caspian Sea	1	Chemistry and Ecology	24	4		233	246		16	10.1080/02757540802310967	https://www.scopus.com/inward/record.url?eid=2-s2.0-50449094336&partnerID=40&md5=883684511b8879c678982c05f680efca	Article	Final		Scopus	2-s2.0-50449094336	57193521789; 6701420257; 23993745700; 24734218300
nis	Zhang, H., Jim, C.Y.	2013	Species adoption for sustainable forestry in Hong Kong's degraded countryside	1	International Journal of Sustainable Development and World Ecology	20	6		484	503		11	10.1080/13504509.2013.818590	https://www.scopus.com/inward/record.url?eid=2-s2.0-84889884518&partnerID=40&md5=748dfa5b2793f33665ac55bd1cbc896f	Article	Final		Scopus	2-s2.0-84889884518	57187861300; 7006143750
nis	Walker, F.M., Williamson, C.H.D., Sanchez, D.E., Sobek, C.J., Chambers, C.L.	2016	Species from feces: Order-wide identification of chiroptera from guano and other non-invasive genetic samples	1	PLoS ONE	11	9	e0162342				40	10.1371/journal.pone.0162342	https://www.scopus.com/inward/record.url?eid=2-s2.0-84992191731&partnerID=40&md5=93373ed3108ef6420f52c7b50b24dbde	Article	Final	All Open Access, Gold, Green	Scopus	2-s2.0-84992191731	15752184600; 39162256900; 57191629152; 56672897200; 7101706213
nis	Fokanov, V.P., Gavrilova, O.V., Shallar, A.V.	2017	Study of effectiveness of UV irradiation of single-cellular organisms transported with ballast waters of ships	0	Russian Journal of Biological Invasions	8	4		386	392		1	10.1134/S2075111717040038	https://www.scopus.com/inward/record.url?eid=2-s2.0-85039076581&partnerID=40&md5=4a81d0d86acda47fb6dd09077653fa7d	Article	Final		Scopus	2-s2.0-85039076581	6602309598; 7003595158; 57200071128
nis	Emery, J.-P., Valentine, L.E., Hitchen, Y., Mitchell, N.	2021	Survival of an Extinct in the Wild skink from Christmas Island is reduced by an invasive centipede: implications for future reintroductions	1	Biological Invasions	23	2		581	592		2	10.1007/s10530-020-02386-3	https://www.scopus.com/inward/record.url?eid=2-s2.0-85093939699&partnerID=40&md5=e21eb858ba7724b15cbed6679fb53ee2	Article	Final		Scopus	2-s2.0-85093939699	57188672798; 14072178800; 55205958500; 35864057300
nis	Chang, A.L., Grossman, J.D., Spezio, T.S., Weiskel, H.W., Blum, J.C., Burt, J.W., Muir, A.A., Piovia-Scott, J., Veblen, K.E., Grosholz, E.D.	2009	Tackling aquatic invasions: Risks and opportunities for the aquarium fish industry	1	Biological Invasions	11	4		773	785		64	10.1007/s10530-008-9292-4	https://www.scopus.com/inward/record.url?eid=2-s2.0-61449176956&partnerID=40&md5=a977265f32c85c2158c6d7230d1faedb	Article	Final	All Open Access, Hybrid Gold	Scopus	2-s2.0-61449176956	7402539354; 36883987500; 24466733900; 57090732300; 15834073700; 22936859400; 7103376936; 22938672900; 16064991300; 6701538801
nis	Korfel, C.A., Hetherington, T.E.	2014	Temperature alone does not explain patterns of Batrachochytrium dendrobatidis infections in the green frog Lithobates clamitans	0	Diseases of Aquatic Organisms	109	3		177	185		5	10.3354/dao02749	https://www.scopus.com/inward/record.url?eid=2-s2.0-84903996347&partnerID=40&md5=8d63aac5f01d25808fd97b2f2763c8e9	Article	Final	All Open Access, Bronze	Scopus	2-s2.0-84903996347	36611857200; 6603857465
nis	Germain, R.M., Mayfield, M.M., Gilbert, B.	2018	The ‘filtering’ metaphor revisited: Competition and environment jointly structure invasibility and coexistence	1	Biology Letters	14	8	20180460				44	10.1098/rsbl.2018.0460	https://www.scopus.com/inward/record.url?eid=2-s2.0-85053149365&partnerID=40&md5=e109b6bce6f2af06ae7d7f22b696c5ae	Article	Final	All Open Access, Bronze, Green	Scopus	2-s2.0-85053149365	56044530800; 8671313800; 56369405800
nis	Carreiras, J., Alberto Pérez-Romero, J., Mateos-Naranjo, E., Redondo-Gómez, S., Rita Matos, A., Caçador, I., Duarte, B.	2020	The effect of heavy metal contamination pre-conditioning in the heat stress tolerance of native and invasive Mediterranean halophytes	1	Ecological Indicators	111		106045				9	10.1016/j.ecolind.2019.106045	https://www.scopus.com/inward/record.url?eid=2-s2.0-85077339015&partnerID=40&md5=f9182420509076a0a4a2b8b6a62f1217	Article	Final		Scopus	2-s2.0-85077339015	57200081565; 57189573430; 23025044800; 14009578500; 8940390800; 6602533871; 20734149900
nis	Ota, W.M., Olsen, B., Bucciarelli, G.M., Kats, L.B.	2018	The effect of newt toxin on an invasive snail	1	Hydrobiologia	817	1		341	348		3	10.1007/s10750-018-3568-1	https://www.scopus.com/inward/record.url?eid=2-s2.0-85044096954&partnerID=40&md5=f1adbed468db19f6cefaa0ba0f7471e0	Article	Final		Scopus	2-s2.0-85044096954	57201259515; 57201258805; 55531293000; 7005208110
nis	Le Roux, J.J., Blignaut, M., Gildenhuys, E., Mavengere, N., Berthouly-Salazar, C.	2014	The molecular ecology of biological invasions: What do we know about non-additive genotypic effects and invasion success?	1	Biological Invasions	16	5		997	1001		2	10.1007/s10530-013-0568-y	https://www.scopus.com/inward/record.url?eid=2-s2.0-84897477065&partnerID=40&md5=bd44a2d692b365f782dcd815be5c41c4	Article	Final		Scopus	2-s2.0-84897477065	15048207800; 55650886700; 56096175300; 56097173000; 55235831600
nis	Magura, T., Lövei, G.L.	2020	The permeability of natural versus anthropogenic forest edges modulates the abundance of ground beetles of different dispersal power and habitat affinity	1	Diversity	12	9	320				8	10.3390/D12090320	https://www.scopus.com/inward/record.url?eid=2-s2.0-85090496481&partnerID=40&md5=226c9f1d2048af34cf1185b2d9525b38	Article	Final	All Open Access, Gold, Green	Scopus	2-s2.0-85090496481	6701761474; 6603880506
nis	Yakimowski, S.B., Rieseberg, L.H.	2014	The role of homoploid hybridization in evolution: A century of studies synthesizing genetics and ecology	0	American Journal of Botany	101	8		1247	1258		140	10.3732/ajb.1400201	https://www.scopus.com/inward/record.url?eid=2-s2.0-84907317071&partnerID=40&md5=8fc2c76cc8c4ad6493b962d3a5375a8b	Article	Final	All Open Access, Bronze	Scopus	2-s2.0-84907317071	8626092500; 35560689600
nis	Albers, H.J., Hall, K.M., Lee, K.D., Taleghan, M.A., Dietterich, T.G.	2018	The Role of Restoration and Key Ecological Invasion Mechanisms in Optimal Spatial-Dynamic Management of Invasive Species	1	Ecological Economics	151			44	54		7	10.1016/j.ecolecon.2018.03.031	https://www.scopus.com/inward/record.url?eid=2-s2.0-85046692357&partnerID=40&md5=924f2fe43eca06acefe234a58235fb11	Article	Final		Scopus	2-s2.0-85046692357	7101748521; 57188568038; 57199191182; 14054747000; 6603937120
nis	Bando, K.J.	2006	The roles of competition and disturbance in a marine invasion	1	Biological Invasions	8	4		755	763		77	10.1007/s10530-005-3543-4	https://www.scopus.com/inward/record.url?eid=2-s2.0-33745668950&partnerID=40&md5=b99d1f6fd06cdfa10e0c342cab780920	Article	Final		Scopus	2-s2.0-33745668950	7101843868
nis	Moore, H.A., Dunlop, J.A., Valentine, L.E., Woinarski, J.C.Z., Ritchie, E.G., Watson, D.M., Nimmo, D.G.	2019	Topographic ruggedness and rainfall mediate geographic range contraction of a threatened marsupial predator	0	Diversity and Distributions	25	12		1818	1831		13	10.1111/ddi.12982	https://www.scopus.com/inward/record.url?eid=2-s2.0-85071956610&partnerID=40&md5=decd36677520c2edb0e28b48b8f81cc1	Article	Final	All Open Access, Gold	Scopus	2-s2.0-85071956610	57205127134; 56040210900; 14072178800; 57203255851; 57205357686; 7402905763; 20734955300
nis	Kowarik, I., Wohlgemuth, J.O.	2006	Tulipa sylvestris (Liliaceae) in Northwestern Germany: A non-indigenous species as an indicator of previous horticulture	1	Polish Botanical Studies	22			317	331		4		https://www.scopus.com/inward/record.url?eid=2-s2.0-38349010844&partnerID=40&md5=c4a3b28932719e3a0668ab5abb16bf8d	Article	Final		Scopus	2-s2.0-38349010844	6602660742; 23468243800
nis	Sankey, T.T., Leonard, J.M., Moore, M.M.	2019	Unmanned Aerial Vehicle − Based Rangeland Monitoring: Examining a Century of Vegetation Changes	1	Rangeland Ecology and Management	72	5		858	863		16	10.1016/j.rama.2019.04.002	https://www.scopus.com/inward/record.url?eid=2-s2.0-85066834492&partnerID=40&md5=27de7b6e63d8a3fb8306731d9b0fccf2	Article	Final	All Open Access, Hybrid Gold	Scopus	2-s2.0-85066834492	14065128700; 56567297800; 7404470890
nis	Arrington, A.	2021	Urban foraging of five non-native plants in NYC: Balancing ecosystem services and invasive species management	1	Urban Forestry and Urban Greening	58		126896				5	10.1016/j.ufug.2020.126896	https://www.scopus.com/inward/record.url?eid=2-s2.0-85095787962&partnerID=40&md5=62c76e24ff9cb256703c0012b163a7c5	Article	Final		Scopus	2-s2.0-85095787962	57214155224
nis	Boyte, S.P., Wylie, B.K., Major, D.J.	2019	Validating a Time Series of Annual Grass Percent Cover in the Sagebrush Ecosystem	1	Rangeland Ecology and Management	72	2		347	359		12	10.1016/j.rama.2018.09.004	https://www.scopus.com/inward/record.url?eid=2-s2.0-85054761421&partnerID=40&md5=632a3e128aeb00669dcca410368ce190	Article	Final		Scopus	2-s2.0-85054761421	25923235500; 7005861597; 55889879600
nis	Hasenbank, M., Brandon, A., Hartley, S.	2011	White butterfly (Pieris rapae) and the white rust Albugo candida on cook's scurvy grass (Lepidium oleraceum)	1	New Zealand Journal of Ecology	35	1		69	75		9		https://www.scopus.com/inward/record.url?eid=2-s2.0-79956217135&partnerID=40&md5=46add1d5629f7544ec370cf270baeed1	Article	Final		Scopus	2-s2.0-79956217135	16177255500; 44761011500; 56243239900
bio	De Broyer, C., Duchesne, P.-A., Linden, C.V., Van Roozendael, F., Jazdzewski, K., Sicinski, J., Jamar, C., Chapelle, G., Dauby, P., Kuyken, T., Nyssen, F., Robert, H.	2000	""Ant'Phipoda"", the biodiversity reference centre for Antarctic amphipoda: A tool for developing and managing Antarctic marine biodiversity information	1	Polskie Archiwum Hydrobiologii	47	44654		657	669				https://www.scopus.com/inward/record.url?eid=2-s2.0-0034427226&partnerID=40&md5=19edce82244bee5ecf5d58154d28fdfb	Article	Final		Scopus	2-s2.0-0034427226	6603400569; 7004542018; 7006387182; 6505510539; 6603806864; 6602988239; 6603953249; 6701598654; 7005134877; 6503963399; 55962071500; 7102327265
bio	Foresta, M., Carranza, M.L., Garfì, V., Di Febbraro, M., Marchetti, M., Loy, A.	2016	A systematic conservation planning approach to fire risk management in Natura 2000 sites	1	Journal of Environmental Management	181			574	581		15	10.1016/j.jenvman.2016.07.006	https://www.scopus.com/inward/record.url?eid=2-s2.0-84978394580&partnerID=40&md5=ad2c10429505cfe7fbd953599db89d87	Article	Final		Scopus	2-s2.0-84978394580	55602356500; 7003707334; 36625277800; 55602536800; 57192094610; 7005747774
bio	Basnou, C., Baró, F., Langemeyer, J., Castell, C., Dalmases, C., Pino, J.	2020	Advancing the green infrastructure approach in the Province of Barcelona: integrating biodiversity, ecosystem functions and services into landscape planning	1	Urban Forestry and Urban Greening	55		126797				11	10.1016/j.ufug.2020.126797	https://www.scopus.com/inward/record.url?eid=2-s2.0-85090554398&partnerID=40&md5=9e2e7c57afe40152be2a6b6436a13003	Article	Final		Scopus	2-s2.0-85090554398	23011672600; 55652382900; 56198699500; 7003725755; 57218875803; 7101640611
bio	Ivanek, V., Dadaček, N., Martinčić, M.I.	2002	Agricultural policy and soil improvement by drainage of wetland habitats in Kalničko Prigorje region lowlands from 1946 to 1990 | Agrarna Politika I Melioracijske Mjere Odvodnje Nizinskih Močvarnih Staništa U Razdoblju Od 1946. Do 1990. Godine U Području Kalničkog Prigorja	1	Hrvatske Vode	10	38		41	48				https://www.scopus.com/inward/record.url?eid=2-s2.0-0036117058&partnerID=40&md5=13028ca741d0cd40425cbf78bd77f4a7	Article	Final		Scopus	2-s2.0-0036117058	57221445125; 6506989188; 6505609155
bio	Huegele, I.B., Manchester, S.R.	2020	An early paleocene carpoflora from the denver basin of colorado, usa, and its implications for plant-animal interactions and fruit size evolution	0	International Journal of Plant Sciences	181	6		646	665		1	10.1086/707727	https://www.scopus.com/inward/record.url?eid=2-s2.0-85089113179&partnerID=40&md5=82b0cab731c4822fd9331af2a6cee99b	Article	Final	All Open Access, Hybrid Gold	Scopus	2-s2.0-85089113179	57210737028; 7007111501
bio	Mantyka-Pringle, C., Leston, L., Messmer, D., Asong, E., Bayne, E.M., Bortolotti, L.E., Sekulic, G., Wheater, H., Howerter, D.W., Clark, R.G.	2019	Antagonistic, synergistic and direct effects of land use and climate on Prairie wetland ecosystems: Ghosts of the past or present?	1	Diversity and Distributions	25	12		1924	1940		8	10.1111/ddi.12990	https://www.scopus.com/inward/record.url?eid=2-s2.0-85074407100&partnerID=40&md5=4436f204a3ca8beb257e1aa76613c31a	Article	Final	All Open Access, Gold	Scopus	2-s2.0-85074407100	54420589800; 14015727700; 57211558782; 56228356500; 7003807288; 36500757600; 57192382150; 7006844456; 6603627907; 16509083800
bio	Swain, D.P., Jonsen, I.D., Simon, J.E., Myers, R.A.	2009	Assessing threats to species at risk using stage-structured state - Space models: Mortality trends in skate populations	1	Ecological Applications	19	5		1347	1364		31	10.1890/08-1699.1	https://www.scopus.com/inward/record.url?eid=2-s2.0-68149136840&partnerID=40&md5=a6e1fc8c0b8540b9e6ebaefdcd7a5503	Article	Final		Scopus	2-s2.0-68149136840	7006471311; 6603341226; 7403955117; 7403701221
bio	Carwardine, J., Wilson, K.A., Watts, M., Etter, A., Klein, C.J., Possingham, H.P.	2008	Avoiding costly conservation mistakes: The importance of defining actions and costs in spatial priority settings	1	PLoS ONE	3	7	e2586				133	10.1371/journal.pone.0002586	https://www.scopus.com/inward/record.url?eid=2-s2.0-49349087990&partnerID=40&md5=51f10b4b536170c71ad885f80f15607a	Article	Final	All Open Access, Gold, Green	Scopus	2-s2.0-49349087990	15845268800; 8046846900; 7201590622; 8247130000; 24587791200; 7006846637
bio	Mosher, B.A., Huyvaert, K.P., Bailey, L.L.	2018	Beyond the swab: ecosystem sampling to understand the persistence of an amphibian pathogen	0	Oecologia	188	1		319	330		9	10.1007/s00442-018-4167-6	https://www.scopus.com/inward/record.url?eid=2-s2.0-85047894955&partnerID=40&md5=9b4ace762ec3146493794e24b036769f	Article	Final		Scopus	2-s2.0-85047894955	57188873840; 6603196044; 7202649465
bio	Borrvall, C., Ebenman, B., Jonsson, T.	2000	Biodiversity lessens the risk of cascading extinction in model food webs	1	Ecology Letters	3	2		131	136		188	10.1046/j.1461-0248.2000.00130.x	https://www.scopus.com/inward/record.url?eid=2-s2.0-0034008986&partnerID=40&md5=24170d41f93cbb83decbbe983e0e6545	Article	Final	All Open Access, Green	Scopus	2-s2.0-0034008986	6506634937; 6602355758; 35517830100
bio	Deuffic, P., Lyser, S.	2012	Biodiversity or bioenergy: Is deadwood conservation an environmental issue for French forest owners?	1	Canadian Journal of Forest Research	42	8		1491	1502		9	10.1139/X2012-073	https://www.scopus.com/inward/record.url?eid=2-s2.0-84864597371&partnerID=40&md5=b866f32bf3d4cf583cb12fcfa09a9414	Article	Final		Scopus	2-s2.0-84864597371	55970776800; 55062421800
bio	Taffetani, F., Rismondo, M.	2009	Bioindicator system for the evaluation of the environmental quality of agro-ecosystems	1	Fitosociologia	46	2		3	22		27		https://www.scopus.com/inward/record.url?eid=2-s2.0-75449094659&partnerID=40&md5=aabbda8ca36f1fa1b8e79087665e77b5	Article	Final		Scopus	2-s2.0-75449094659	8060220800; 35768247600
bio	Martin, T.G., Arcese, P., Scheerder, N.	2011	Browsing down our natural heritage: Deer impacts on vegetation structure and songbird populations across an island archipelago	1	Biological Conservation	144	1		459	469		67	10.1016/j.biocon.2010.09.033	https://www.scopus.com/inward/record.url?eid=2-s2.0-78751567787&partnerID=40&md5=7a3166d2a2710ea611fd5fc91cc3750f	Article	Final		Scopus	2-s2.0-78751567787	7403463365; 56108547400; 36572398600
bio	Fensham, R.J., Guymer, G.P.	2009	Carbon accumulation through ecosystem recovery	1	Environmental Science and Policy	12	3		367	372		46	10.1016/j.envsci.2008.12.002	https://www.scopus.com/inward/record.url?eid=2-s2.0-64049112182&partnerID=40&md5=5b2bf7440c0a99b5422e30556e3aaf70	Article	Final		Scopus	2-s2.0-64049112182	7003689075; 6507171363
bio	Angerbjörn, A., Eide, N.E., Dalén, L., Elmhagen, B., Hellström, P., Ims, R.A., Killengreen, S., Landa, A., Meijer, T., Mela, M., Niemimaa, J., Norén, K., Tannerfeldt, M., Yoccoz, N.G., Henttonen, H.	2013	Carnivore conservation in practice: Replicated management actions on a large spatial scale	1	Journal of Applied Ecology	50	1		59	67		65	10.1111/1365-2664.12033	https://www.scopus.com/inward/record.url?eid=2-s2.0-84873176850&partnerID=40&md5=2dcac89d0e601813a5022b454d11f0d2	Article	Final	All Open Access, Bronze, Green	Scopus	2-s2.0-84873176850	7004082312; 7003898871; 6602841361; 6507592347; 15831520300; 7006373946; 15764894400; 7005978462; 24492264100; 37009129500; 6603413093; 12647019600; 6602121507; 7003791420; 35494522700
bio	Chen, C., Börnick, H., Cai, Q., Dai, X., Jähnig, S.C., Kong, Y., Krebs, P., Kuenzer, C., Kunstmann, H., Liu, Y., Nixdorf, E., Pang, Z., Rode, M., Schueth, C., Song, Y., Yue, T., Zhou, K., Zhang, J., Kolditz, O.	2014	Challenges and opportunities of German-Chinese cooperation in water science and technology	1	Environmental Earth Sciences	73	8	A4861	4861	4871		14	10.1007/s12665-015-4149-5	https://www.scopus.com/inward/record.url?eid=2-s2.0-84912111833&partnerID=40&md5=bdbddd1130241286d321f5fd094dd09b	Article	Final	All Open Access, Green	Scopus	2-s2.0-84912111833	56544791900; 6506045590; 7201853808; 57218296147; 24437492700; 42961713300; 7006511800; 55927784300; 6603129131; 56785898300; 56786537100; 8655065700; 55577242900; 56786414700; 8410054800; 7101867316; 57189375642; 56276628400; 6701555654
bio	Domínguez-Domínguez, O., Zambrano, L., Escalera-Vázquez, L.H., Pérez-Rodríguez, R., De León, G.P.-P.	2008	Changes in the distribution of goodeids (Osteichthyes: Cyprinodontiformes: Goodeidae) in river basins of Central Mexico | Cambio en la distribución de goodeidos (Osteichthyes: Cyprinodontiformes: Goodeidae) en cuencas hidrológicas del centro de México	1	Revista Mexicana de Biodiversidad	79	2		501	512		26		https://www.scopus.com/inward/record.url?eid=2-s2.0-60749134771&partnerID=40&md5=024c8e1ba9c73583c21085b05ce96eab	Article	Final		Scopus	2-s2.0-60749134771	8878221000; 6603395046; 6504670383; 26031654200; 7004342420
bio	Aguirre, A.A.	2017	Changing patterns of emerging zoonotic diseases in wildlife, domestic animals, and humans linked to biodiversity loss and globalization	1	ILAR Journal	58	3		315	318		21	10.1093/ilar/ilx035	https://www.scopus.com/inward/record.url?eid=2-s2.0-85045420062&partnerID=40&md5=cc11f6673b4cab04028c4acb7e7a0075	Article	Final	All Open Access, Bronze	Scopus	2-s2.0-85045420062	36939205400
bio	Soverel, N.O., Coops, N.C., White, J.C., Wulder, M.A.	2010	Characterizing the forest fragmentation of Canada's national parks	0	Environmental Monitoring and Assessment	164	44652		481	499		25	10.1007/s10661-009-0908-7	https://www.scopus.com/inward/record.url?eid=2-s2.0-77952292814&partnerID=40&md5=4eb865acc971178cea4dabbb57b14588	Article	Final		Scopus	2-s2.0-77952292814	26535312300; 54790508000; 7405251438; 57208357584
bio	Turschwell, M.P., Brown, C.J., Pearson, R.M., Connolly, R.M.	2020	China's Belt and Road Initiative: Conservation opportunities for threatened marine species and habitats	1	Marine Policy	112		103791				11	10.1016/j.marpol.2019.103791	https://www.scopus.com/inward/record.url?eid=2-s2.0-85076928155&partnerID=40&md5=c9025faa800a56dfee1d36ff9d1abebf	Article	Final		Scopus	2-s2.0-85076928155	56513979900; 57208155764; 56739999000; 7101819604
bio	Kathryn Mceachern, A., Thomson, D.M., Chess, K.A.	2009	Climate alters response of an endemic island plant to removal of invasive herbivores	1	Ecological Applications	19	6		1574	1584		16	10.1890/08-1574.1	https://www.scopus.com/inward/record.url?eid=2-s2.0-69449104156&partnerID=40&md5=0c5c4e48b277fcde959a8db6fc3a3bd4	Article	Final		Scopus	2-s2.0-69449104156	34067646500; 8640004900; 57168397900
bio	Cheng, C.-Y., Lin, K.-H., Shih, C.-W.	2019	Coexistence and extinction for two competing species in patchy environments	1	Mathematical Biosciences and Engineering	16	2		909	946		1	10.3934/mbe.2019043	https://www.scopus.com/inward/record.url?eid=2-s2.0-85061094664&partnerID=40&md5=3688d9289510e51648c517f05b35d5b5	Article	Final	All Open Access, Bronze	Scopus	2-s2.0-85061094664	8527419500; 37043517500; 7402427758
bio	Bhowmick, A.R., Saha, B., Chattopadhyay, J., Ray, S., Bhattacharya, S.	2015	Cooperation in species: Interplay of population regulation and extinction through global population dynamics database	1	Ecological Modelling	312			150	165		13	10.1016/j.ecolmodel.2015.05.023	https://www.scopus.com/inward/record.url?eid=2-s2.0-84930654997&partnerID=40&md5=6cc16f2fc70e84e840b8011c9ea8551a	Article	Final		Scopus	2-s2.0-84930654997	55513170200; 55514060400; 6602973315; 7402322431; 57207206384
bio	Byrne, M., Steane, D.A., Joseph, L., Yeates, D.K., Jordan, G.J., Crayn, D., Aplin, K., Cantrill, D.J., Cook, L.G., Crisp, M.D., Keogh, J.S., Melville, J., Moritz, C., Porch, N., Sniderman, J.M.K., Sunnucks, P., Weston, P.H.	2011	Decline of a biome: Evolution, contraction, fragmentation, extinction and invasion of the Australian mesic zone biota	1	Journal of Biogeography	38	9		1635	1656		277	10.1111/j.1365-2699.2011.02535.x	https://www.scopus.com/inward/record.url?eid=2-s2.0-80051671519&partnerID=40&md5=2d730bfb9ee704257a76fc0ce9753737	Article	Final	All Open Access, Bronze	Scopus	2-s2.0-80051671519	7202358626; 6603813933; 35613217800; 7006948298; 7202856568; 6602470952; 6701380029; 7003509425; 7201872191; 55666188000; 7101791446; 7006133907; 7004440591; 24071780100; 8517612800; 7004680459; 7103145111
bio	Olaya-Arenas, P., Meléndez-Ackerman, E.J., Pérez, M.E., Tremblay, R.	2011	Demographic response by a small epiphytic orchid	1	American Journal of Botany	98	12		2040	2048		14	10.3732/ajb.1100223	https://www.scopus.com/inward/record.url?eid=2-s2.0-84858412336&partnerID=40&md5=2a1e631461e6b2226fa6d71c30f57624	Article	Final	All Open Access, Bronze	Scopus	2-s2.0-84858412336	55102919400; 6603173653; 24285852300; 7201663553
bio	Reed, D.T., Tosh, C.R.	2019	Diversity loss is predicted to increase extinction risk of specialist animals by constraining their ability to expand niche	1	Journal of Theoretical Biology	476			44	50		1	10.1016/j.jtbi.2019.05.016	https://www.scopus.com/inward/record.url?eid=2-s2.0-85066428800&partnerID=40&md5=77fcacac25c529b21f71b8a8461b0d80	Article	Final		Scopus	2-s2.0-85066428800	57209070271; 7003836761
bio	Bloom, D.D., Weir, J.T., Piller, K.R., Lovejoy, N.R.	2013	Do Freshwater Fishes Diversify Faster Than Marine Fishes? A Test Using State-Dependent Diversification Analyses And Molecular Phylogenetics Of New World Silversides (Atherinopsidae)	0	Evolution	67	7		2040	2057		81	10.1111/evo.12074	https://www.scopus.com/inward/record.url?eid=2-s2.0-84879780310&partnerID=40&md5=207b579dd11d019f29be3e08dbf82ff6	Article	Final	All Open Access, Bronze	Scopus	2-s2.0-84879780310	24398378000; 8253253900; 6603030542; 7003599192
bio	Hirschfeld, M., Blackburn, D.C., Doherty-Bone, T.M., Gonwouo, L.N., Ghose, S., Rödel, M.-O.	2016	Dramatic declines of montane frogs in a Central African biodiversity hotspot	1	PLoS ONE	11	5	e0155129				28	10.1371/journal.pone.0155129	https://www.scopus.com/inward/record.url?eid=2-s2.0-85010941069&partnerID=40&md5=eb8d366e8424959e31572493c11ae17c	Article	Final	All Open Access, Gold, Green	Scopus	2-s2.0-85010941069	47762158300; 7005699145; 26024596200; 24343600200; 56304580100; 36939347400
bio	Liu, L., Liu, H., Li, Y., Wang, J., Xie, F.	2018	Dynamic changes in population size and habitat distribution of wintering red-crowned crane in northern Jiangsu Province	1	Shengtai Xuebao	38	3		926	933		12	10.5846/stxb201611022231	https://www.scopus.com/inward/record.url?eid=2-s2.0-85050771899&partnerID=40&md5=2c459c563ea09eb8462acabd92704a54	Article	Final		Scopus	2-s2.0-85050771899	57209926558; 35107754800; 37012754300; 57196214155; 57203158690
bio	Moon, B.C., Stubbs, T.L.	2020	Early high rates and disparity in the evolution of ichthyosaurs	0	Communications Biology	3	1	68				14	10.1038/s42003-020-0779-6	https://www.scopus.com/inward/record.url?eid=2-s2.0-85079337296&partnerID=40&md5=26182a3ffea5ad50f853428c289b8873	Article	Final	All Open Access, Gold, Green	Scopus	2-s2.0-85079337296	56537789400; 46861618700
bio	Fuma, S., Ishii, N., Takeda, H., Miyamoto, K., Yanagisawa, K., Ichimasa, Y., Saito, M., Kawabata, Z., Polikarpov, G.G.	2003	Ecological effects of various toxic agents on the aquatic microcosm in comparison with acute ionizing radiation	1	Journal of Environmental Radioactivity	67	1		1	14		21	10.1016/S0265-931X(02)00143-1	https://www.scopus.com/inward/record.url?eid=2-s2.0-0037216835&partnerID=40&md5=329a21561ebc29ebb4db82c20a9f034d	Article	Final		Scopus	2-s2.0-0037216835	6604029528; 7402368264; 57192144125; 56240725900; 7201533365; 6603904048; 7404973481; 35597584400; 7004331387
bio	Yu, S., Cui, B., Xie, C., Ma, X., Man, Y., Ning, Z.	2019	Ecological Offsetting in China’s Coastal Wetlands: Existing Challenges and Strategies for Future Improvement	1	Chinese Geographical Science	29	2		202	213		6	10.1007/s11769-019-1024-4	https://www.scopus.com/inward/record.url?eid=2-s2.0-85059594965&partnerID=40&md5=037c59b089d89951721fafb90fdbf5e3	Article	Final		Scopus	2-s2.0-85059594965	57195278130; 8238752900; 57205333616; 57193316202; 56661851800; 57205329683
bio	Cowles, J., Boldgiv, B., Liancourt, P., Petraitis, P.S., Casper, B.B.	2018	Effects of increased temperature on plant communities depend on landscape location and precipitation	1	Ecology and Evolution	8	11		5267	5278		26	10.1002/ece3.3995	https://www.scopus.com/inward/record.url?eid=2-s2.0-85046553592&partnerID=40&md5=f837cbc940444e0e8fb5165cf849fb2c	Article	Final	All Open Access, Gold, Green	Scopus	2-s2.0-85046553592	56268993400; 26533940100; 23088835100; 6603975178; 7003431145
bio	Self, A.	2007	End of the cold war	1	Planet Earth		WINTER		37					https://www.scopus.com/inward/record.url?eid=2-s2.0-38549119330&partnerID=40&md5=d82d1c598d8d99d772a1f7ce62f33b79	Article	Final		Scopus	2-s2.0-38549119330	23478887200
bio	Lowe, E.C., Threlfall, C.G., Wilder, S.M., Hochuli, D.F.	2018	Environmental drivers of spider community composition at multiple scales along an urban gradient	1	Biodiversity and Conservation	27	4		829	852		15	10.1007/s10531-017-1466-x	https://www.scopus.com/inward/record.url?eid=2-s2.0-85034113700&partnerID=40&md5=a943da1b9c25b7512d634064de71a733	Article	Final		Scopus	2-s2.0-85034113700	56303777400; 25947861600; 7003532385; 6602227360
bio	Nakanishi, J., Gamo, M., Iwasa, Y., Tanaka, Y.	2003	Environmental risk evaluation of chemicals: Achievements of the project and seeds for future - Development of metrics for evaluating risks	1	Chemosphere	53	4		389	398		6	10.1016/S0045-6535(03)00045-6	https://www.scopus.com/inward/record.url?eid=2-s2.0-0142228242&partnerID=40&md5=d116bc15c7954cea09e5a10e273941af	Article	Final		Scopus	2-s2.0-0142228242	7005280326; 7003642797; 57204609229; 57216495420
bio	Liu, S.L., Cui, B.S., Dong, S.K., Yang, Z.F., Yang, M., Holt, K.	2008	Evaluating the influence of road networks on landscape and regional ecological risk-A case study in Lancang River Valley of Southwest China	1	Ecological Engineering	34	2		91	99		118	10.1016/j.ecoleng.2008.07.006	https://www.scopus.com/inward/record.url?eid=2-s2.0-51249083217&partnerID=40&md5=2b9a237652f1e90c0e711516ba64baa6	Article	Final		Scopus	2-s2.0-51249083217	8664704400; 8238752900; 7402016821; 7405433398; 55703330200; 57196529089
bio	Simao, M.-C.M., Matthijs, J., Perfecto, I.	2018	Experimental small-scale flower patches increase species density but not abundance of small urban bees	1	Journal of Applied Ecology	55	4		1759	1768		11	10.1111/1365-2664.13085	https://www.scopus.com/inward/record.url?eid=2-s2.0-85041211751&partnerID=40&md5=9e8c98cb48f179255eb3a46cccb53642	Article	Final		Scopus	2-s2.0-85041211751	56584108300; 57200406968; 6701702950
bio	Lima, V.P., Marchioro, C.A., Joner, F., ter Steege, H., Siddique, I.	2020	Extinction threat to neglected Plinia edulis exacerbated by climate change, yet likely mitigated by conservation through sustainable use	1	Austral Ecology	45	3		376	383		3	10.1111/aec.12867	https://www.scopus.com/inward/record.url?eid=2-s2.0-85080142575&partnerID=40&md5=cb17f18668f5b8a269e1b63f6298b04d	Article	Final		Scopus	2-s2.0-85080142575	57194654203; 52264095200; 20436382700; 6603780906; 55822409500
bio	Bakx, T.R.M., Lindström, Å., Ram, D., Pettersson, L.B., Smith, H.G., van Loon, E.E., Caplat, P.	2020	Farmland birds occupying forest clear-cuts respond to both local and landscape features	1	Forest Ecology and Management	478		118519				3	10.1016/j.foreco.2020.118519	https://www.scopus.com/inward/record.url?eid=2-s2.0-85089898555&partnerID=40&md5=ca512ae3c73aaf8930e2eef246df8f4c	Article	Final	All Open Access, Hybrid Gold, Green	Scopus	2-s2.0-85089898555	57209575598; 7005981769; 57192684965; 7103106302; 57208290451; 7004408790; 23394608100
bio	Naveh, Z.	1995	From biodiversity to ecodiversity: new tools for holistic landscape conservation	1	International Journal of Ecology &amp; Environmental Sciences	21	1		1	16		14		https://www.scopus.com/inward/record.url?eid=2-s2.0-0029530964&partnerID=40&md5=7cb0e11a74bd623781bad5dbfd23403f	Article	Final		Scopus	2-s2.0-0029530964	6603910227
bio	Hirao, T., Murakami, M., Oguma, H.	2008	Functional spatial scale of community composition change in response to windthrow disturbance in a deciduous temperate forest	1	Ecological Research	23	2		249	258		13	10.1007/s11284-007-0372-1	https://www.scopus.com/inward/record.url?eid=2-s2.0-40349085657&partnerID=40&md5=b2b479fb31cea45f813772b5f9147078	Article	Final	All Open Access, Green	Scopus	2-s2.0-40349085657	8543341400; 7404135725; 12041082200
bio	Oliveira, H.R., Staggemeier, V.G., Quintino Faria, J.E., de Oliveira, G., Diniz-Filho, J.A.F.	2019	Geographical ecology and conservation of Eugenia L. (Myrtaceae) in the Brazilian Cerrado: Past, present and future	1	Austral Ecology	44	1		95	104		5	10.1111/aec.12657	https://www.scopus.com/inward/record.url?eid=2-s2.0-85052945249&partnerID=40&md5=fcb9f1595949b6252264e2db886bffc1	Article	Final		Scopus	2-s2.0-85052945249	55938207400; 24825628600; 57203790840; 23484975500; 7004620621
bio	Vogel, C., Chunga, T.L., Sun, X., Poveda, K., Steffan-Dewenter, I.	2021	Higher bee abundance, but not pest abundance, in landscapes with more agriculture on a late-flowering legume crop in tropical smallholder farms	1	PeerJ	9		10732				3	10.7717/peerj.10732	https://www.scopus.com/inward/record.url?eid=2-s2.0-85101191968&partnerID=40&md5=accca5451dff3b4f6cf39cbd96e9646b	Article	Final	All Open Access, Gold, Green	Scopus	2-s2.0-85101191968	57211868181; 57222066237; 57222002731; 8692330800; 7004114191
bio	Palen, W.J., Williamson, C.E., Clauser, A.A., Schindler, D.E.	2005	Impact of UV-B exposure on amphibian embryos: Linking species physiology and oviposition behaviour	1	Proceedings of the Royal Society B: Biological Sciences	272	1569		1227	1234		43	10.1098/rspb.2005.3058	https://www.scopus.com/inward/record.url?eid=2-s2.0-24044443271&partnerID=40&md5=af2944b1ed21c0d4f82f676b50e7d92c	Article	Final	All Open Access, Green	Scopus	2-s2.0-24044443271	7801682241; 7201705406; 8951173900; 7102770247
bio	Batáry, P., Rösch, V., Dormann, C.F., Tscharntke, T.	2021	Increasing connectivity enhances habitat specialists but simplifies plant–insect food webs	1	Oecologia	195	2		539	546		4	10.1007/s00442-020-04830-6	https://www.scopus.com/inward/record.url?eid=2-s2.0-85097984097&partnerID=40&md5=b5b77948dd9be0429d705a258eacc252	Article	Final	All Open Access, Hybrid Gold, Green	Scopus	2-s2.0-85097984097	9041992700; 23767425000; 7004258461; 57217798989
bio	Gimmi, U., Schmidt, S.L., Hawbaker, T.J., Alcántara, C., Gafvert, U., Radeloff, V.C.	2011	Increasing development in the surroundings of U.S. National Park Service holdings jeopardizes park effectiveness	1	Journal of Environmental Management	92	1		229	239		39	10.1016/j.jenvman.2010.09.006	https://www.scopus.com/inward/record.url?eid=2-s2.0-77957779482&partnerID=40&md5=63d5839fcee21ebaa944f2488372655e	Article	Final		Scopus	2-s2.0-77957779482	16444317900; 57198523621; 8895543100; 8052654300; 36709748800; 6603785931
bio	Simons-Legaard, E.M., Harrison, D.J., Legaard, K.R.	2018	Ineffectiveness of local zoning to reduce regional loss and fragmentation of wintering habitat for white-tailed deer	1	Forest Ecology and Management	427			78	85		6	10.1016/j.foreco.2018.05.027	https://www.scopus.com/inward/record.url?eid=2-s2.0-85047840843&partnerID=40&md5=c7ea02f0feef6c4f83ab547ecdfd24e4	Article	Final	All Open Access, Bronze	Scopus	2-s2.0-85047840843	55915794200; 7403545870; 15065573100
bio	Lewis, K.E., Rota, C.T., Lituma, C.M., Anderson, J.T.	2019	Influence of the Agricultural Conservation Easement Program wetland practices on winter occupancy of Passerellidae sparrows and avian species richness	1	PLoS ONE	14	1	e0210878				6	10.1371/journal.pone.0210878	https://www.scopus.com/inward/record.url?eid=2-s2.0-85060479197&partnerID=40&md5=5b908e57c7e6a9f7c9e8fb0175f911d0	Article	Final	All Open Access, Gold, Green	Scopus	2-s2.0-85060479197	57205543253; 35243175200; 24481659000; 57208007027
bio	de la Estrella, M., Forest, F., Wieringa, J.J., Fougère-Danezan, M., Bruneau, A.	2017	Insights on the evolutionary origin of Detarioideae, a clade of ecologically dominant tropical African trees	1	New Phytologist	214	4		1722	1735		35	10.1111/nph.14523	https://www.scopus.com/inward/record.url?eid=2-s2.0-85016608696&partnerID=40&md5=26581be4957bb0ffb520e47bd540c08b	Article	Final	All Open Access, Bronze	Scopus	2-s2.0-85016608696	8609634600; 15922773000; 7003327425; 23468949800; 7003889593
bio	Ramírez-Mejía, D., Cuevas, G., Meli, P., Mendoza, E.	2017	Land use and cover change scenarios in the Mesoamerican Biological Corridor-Chiapas, México	1	Botanical Sciences	95	2		221	234		6	10.17129/botsci.838	https://www.scopus.com/inward/record.url?eid=2-s2.0-85024105142&partnerID=40&md5=6e1fd4dfaa5ddb4cffbde00d60dced17	Article	Final	All Open Access, Gold, Green	Scopus	2-s2.0-85024105142	55885973100; 7004077893; 8754075600; 55867504900
bio	Modernel, P., Rossing, W.A.H., Corbeels, M., Dogliotti, S., Picasso, V., Tittonell, P.	2016	Land use change and ecosystem service provision in Pampas and Campos grasslands of southern South America	1	Environmental Research Letters	11	11	113002				106	10.1088/1748-9326/11/11/113002	https://www.scopus.com/inward/record.url?eid=2-s2.0-85004000453&partnerID=40&md5=5f7809a3475c0f649c8ac0a1e223dfbe	Article	Final	All Open Access, Gold, Green	Scopus	2-s2.0-85004000453	55886803300; 7003273302; 6602647936; 6506065022; 23490126100; 14520144600
bio	Sieber, A., Kuemmerle, T., Prishchepov, A.V., Wendland, K.J., Baumann, M., Radeloff, V.C., Baskin, L.M., Hostert, P.	2013	Landsat-based mapping of post-Soviet land-use change to assess the effectiveness of the Oksky and Mordovsky protected areas in European Russia	1	Remote Sensing of Environment	133			38	51		57	10.1016/j.rse.2013.01.021	https://www.scopus.com/inward/record.url?eid=2-s2.0-84874548925&partnerID=40&md5=f7f14a606c0f10251b90ffb5e14ad2dd	Article	Final		Scopus	2-s2.0-84874548925	54396231900; 8293489400; 36946308900; 23995860300; 55437763600; 6603785931; 7102434420; 6602798575
bio	Watts, B.D.	1996	Landscape configuration and diversity hotspots in wintering sparrows	1	Oecologia	108	3		512	517		15	10.1007/BF00333728	https://www.scopus.com/inward/record.url?eid=2-s2.0-0030301680&partnerID=40&md5=1d7d4acfd778d261a4b4e3ec2e6abfa5	Article	Final		Scopus	2-s2.0-0030301680	7006002487
bio	Poveda, K., Martínez, E., Kersch-Becker, M.F., Bonilla, M.A., Tscharntke, T.	2012	Landscape simplification and altitude affect biodiversity, herbivory and Andean potato yield	1	Journal of Applied Ecology	49	2		513	522		50	10.1111/j.1365-2664.2012.02120.x	https://www.scopus.com/inward/record.url?eid=2-s2.0-84859160306&partnerID=40&md5=fc720aa5d5e35ac6121ae6ee440caf28	Article	Final		Scopus	2-s2.0-84859160306	8692330800; 43461906600; 55070746900; 36780695700; 7003472839
bio	Komonen, A., Tuominen, L., Purhonen, J., Halme, P.	2020	Landscape structure influences browsing on a keystone tree species in conservation areas	1	Forest Ecology and Management	457		117724				6	10.1016/j.foreco.2019.117724	https://www.scopus.com/inward/record.url?eid=2-s2.0-85076031373&partnerID=40&md5=1a23f8a83d23635f4826ae95a7648361	Article	Final	All Open Access, Green	Scopus	2-s2.0-85076031373	6602121437; 57517227800; 57039215000; 15765013500
bio	Ye, F., Kameyama, S.	2021	Long-term nationwide spatiotemporal changes of freshwater temperature in Japan during 1982–2016	1	Journal of Environmental Management	281		111866				1	10.1016/j.jenvman.2020.111866	https://www.scopus.com/inward/record.url?eid=2-s2.0-85098935470&partnerID=40&md5=d5dae3d5c835283e88c68302a1621e98	Article	Final		Scopus	2-s2.0-85098935470	57219336051; 7005873020
bio	Gandy, M.	2013	Marginalia: Aesthetics, Ecology, and Urban Wastelands	1	Annals of the Association of American Geographers	103	6		1301	1316		97	10.1080/00045608.2013.832105	https://www.scopus.com/inward/record.url?eid=2-s2.0-84886402552&partnerID=40&md5=f245a9293b81236306b4f544ff8b1ef2	Article	Final	All Open Access, Bronze, Green	Scopus	2-s2.0-84886402552	7004299922
bio	Monroe, M.J., Bokma, F.	2013	Mass extinctions do not explain skew in interspecific body size distributions	1	Journal of Zoological Systematics and Evolutionary Research	51	1		13	18		2	10.1111/jzs.12002	https://www.scopus.com/inward/record.url?eid=2-s2.0-84872651687&partnerID=40&md5=7e7ea46e4a3147104c3097fcad3d2482	Article	Final		Scopus	2-s2.0-84872651687	35230431100; 6603118883
bio	Matlaga, D.P., Davis, A.S.	2013	Minimizing invasive potential of Miscanthus × giganteus grown for bioenergy: Identifying demographic thresholds for population growth and spread	0	Journal of Applied Ecology	50	2		479	487		21	10.1111/1365-2664.12057	https://www.scopus.com/inward/record.url?eid=2-s2.0-84875679946&partnerID=40&md5=ae25da9d6957eb30749ced8e83ebe236	Article	Final	All Open Access, Bronze	Scopus	2-s2.0-84875679946	8268407300; 8698438700
bio	Beirne, C., Sun, C., Tattersall, E.R., Burgar, J.M., Fisher, J.T., Burton, A.C.	2021	Multispecies modelling reveals potential for habitat restoration to re-establish boreal vertebrate community dynamics	1	Journal of Applied Ecology	58	12		2821	2832		2	10.1111/1365-2664.14020	https://www.scopus.com/inward/record.url?eid=2-s2.0-85115019627&partnerID=40&md5=bfa0b7dccd301bb9d6dbe6846966d47e	Article	Final		Scopus	2-s2.0-85115019627	55868016300; 56013812200; 57211934675; 55607928800; 8641101600; 55789505883
bio	Power, E.F., Kelly, D.L., Stout, J.C.	2012	Organic farming and landscape structure: Effects on insect-pollinated plant diversity in intensively managed grasslands	1	PLoS ONE	7	5	e38073				34	10.1371/journal.pone.0038073	https://www.scopus.com/inward/record.url?eid=2-s2.0-84861650376&partnerID=40&md5=08ee1a823d94c585d2294a87b820b397	Article	Final	All Open Access, Gold, Green	Scopus	2-s2.0-84861650376	36802491600; 7403137076; 7201718407
bio	Allan, J.R., Grossmann, F., Craig, R., Nelson, A., Maina, J., Flower, K., Bampton, J., Deffontaines, J.-B., Miguel, C., Araquechande, B., Watson, J.E.M.	2017	Patterns of for est loss in one of Africa's last remaining wilderness areas: Niassa national reserve (northern Mozambique)	1	Parks	23	2		40	50		6	10.2305/IUCN.CH.2017.PARKS-23-2JRA.en	https://www.scopus.com/inward/record.url?eid=2-s2.0-85036496646&partnerID=40&md5=c27f1f67b95e6dd7b6861a4856cdfa21	Article	Final	All Open Access, Bronze, Green	Scopus	2-s2.0-85036496646	57189308257; 16241461800; 57198438143; 57198451629; 8979455900; 57198428989; 57220336991; 57198443660; 57198443765; 57198448017; 55213700400
bio	Eisenhauer, N., Milcu, A., Sabais, A.C.W., Bessler, H., Weigelt, A., Engels, C., Scheu, S.	2009	Plant community impacts on the structure of earthworm communities depend on season and change with time	1	Soil Biology and Biochemistry	41	12		2430	2443		50	10.1016/j.soilbio.2009.09.001	https://www.scopus.com/inward/record.url?eid=2-s2.0-70350571163&partnerID=40&md5=d588edf1de73da320eae760ba082e78c	Article	Final		Scopus	2-s2.0-70350571163	22939857600; 14056402700; 25641982900; 25649255100; 6602406403; 7004494376; 7006140205
bio	Marcenò, C., Padullés Cubino, J., Chytrý, M., Genduso, E., Gristina, A.S., La Rosa, A., Salemi, D., Landucci, F., Pasta, S., Guarino, R.	2021	Plant hunting: exploring the behaviour of amateur botanists in the field	0	Biodiversity and Conservation	30	11		3265	3278		1	10.1007/s10531-021-02248-x	https://www.scopus.com/inward/record.url?eid=2-s2.0-85110909554&partnerID=40&md5=7ee88c9f35fb1ada8ad03574c9e45796	Article	Final		Scopus	2-s2.0-85110909554	55622009600; 56780380300; 6701827152; 57223395243; 56401719600; 50661492400; 57223391619; 54899223700; 57221111881; 7004093989
bio	Parra-Tabla, V., Campos-Navarrete, M.J., Arceo-Gómez, G.	2017	Plant–floral visitor network structure in a smallholder Cucurbitaceae agricultural system in the tropics: implications for the extinction of main floral visitors	1	Arthropod-Plant Interactions	11	5		731	740		4	10.1007/s11829-017-9529-1	https://www.scopus.com/inward/record.url?eid=2-s2.0-85018836644&partnerID=40&md5=ec139a3d6bb32a51cdd9f827dd028d99	Article	Final		Scopus	2-s2.0-85018836644	6602194849; 36134262500; 28767495100
bio	Recher, H.F.	2017	Politics, emotion, and ideology: The reality of reserve selection for nature conservation in Australia	1	Australian Zoologist	39	2		257	271		4	10.7882/AZ.2015.024	https://www.scopus.com/inward/record.url?eid=2-s2.0-85039975733&partnerID=40&md5=f89cba1b6c1aaed8b58e62d13f737ec4	Article	Final		Scopus	2-s2.0-85039975733	7004565549
bio	Rahman, D.A., Gonzalez, G., Aulagnier, S.	2017	Population size, distribution and status of the remote and Critically Endangered Bawean deer Axis kuhlii	1	ORYX	51	4		665	672		12	10.1017/S0030605316000429	https://www.scopus.com/inward/record.url?eid=2-s2.0-84990221709&partnerID=40&md5=6fceb5817dcf642386a5885098101ef3	Article	Final	All Open Access, Bronze	Scopus	2-s2.0-84990221709	57190439961; 7202571050; 6701362924
bio	Lkhagvasuren, M., Murdoch, J.D., Munkhzul, T., Strong, A.M.	2016	Predicting the effects of habitat loss on corsac fox occupancy in Mongolia	1	Journal of Mammalogy	97	4		1153	1163		4	10.1093/jmammal/gyw067	https://www.scopus.com/inward/record.url?eid=2-s2.0-84982969048&partnerID=40&md5=03ded56d2ffa47d28dc03b815128f6c2	Article	Final		Scopus	2-s2.0-84982969048	57190750790; 7103383833; 26024285200; 7102215532
bio	McDermott, A.	2019	Probing the limits of “evolutionary rescue” Could species threatened by climate change and other stresses avoid extinction through rapid evolution?	1	Proceedings of the National Academy of Sciences of the United States of America	116	25		12116	12120		4	10.1073/pnas.1907565116	https://www.scopus.com/inward/record.url?eid=2-s2.0-85067626299&partnerID=40&md5=6f92e0a2bdf49adaf39f6ae55741bdb1	Article	Final	All Open Access, Bronze, Green	Scopus	2-s2.0-85067626299	57209399545
bio	Li, C., Li, J., Wu, J.	2013	Quantifying the speed, growth modes, and landscape pattern changes of urbanization: A hierarchical patch dynamics approach	1	Landscape Ecology	28	10		1875	1888		128	10.1007/s10980-013-9933-6	https://www.scopus.com/inward/record.url?eid=2-s2.0-84888305750&partnerID=40&md5=20e63809e458ab47a5f391df70d77459	Article	Final		Scopus	2-s2.0-84888305750	57208500705; 56901722000; 54080586800
bio	Stokeld, D., Fisher, A., Gentles, T., Hill, B.M., Woinarski, J.C.Z., Young, S., Gillespie, G.R.	2018	Rapid increase of Australian tropical savanna reptile abundance following exclusion of feral cats	1	Biological Conservation	225			213	221		13	10.1016/j.biocon.2018.06.025	https://www.scopus.com/inward/record.url?eid=2-s2.0-85050077425&partnerID=40&md5=946052a40bf6492f9bce5caaee11fcaa	Article	Final		Scopus	2-s2.0-85050077425	56326194500; 7403451951; 57201467994; 56249562200; 57203255851; 36161532800; 7102523960
bio	Olson, S.L.	2005	Refutation of the historical evidence for a Hispaniolan Macaw (Aves: Psittacidae: Ara)	1	Caribbean Journal of Science	41	2		319	323		5		https://www.scopus.com/inward/record.url?eid=2-s2.0-24644502758&partnerID=40&md5=b3f44f301c03ab93964e5696b5f50d32	Article	Final		Scopus	2-s2.0-24644502758	7202063278
bio	van Asperen, E.N., Kirby, J.R., Shaw, H.E.	2020	Relating dung fungal spore influx rates to animal density in a temperate environment: Implications for palaeoecological studies	1	Holocene	30	2		218	232		10	10.1177/0959683619875804	https://www.scopus.com/inward/record.url?eid=2-s2.0-85075581449&partnerID=40&md5=1161dddcbff0fc0e6be941532eb8cb76	Article	Final	All Open Access, Green	Scopus	2-s2.0-85075581449	35520260400; 7202384195; 15842721800
bio	Alvarenga, L.D.P., Pôrto, K.C., Silva, M.P.P.	2009	Relations between Regional-Local Habitat Loss and Metapopulation Properties of Epiphyllous Bryophytes in the Brazilian Atlantic Forest	1	Biotropica	41	6		682	691		20	10.1111/j.1744-7429.2009.00532.x	https://www.scopus.com/inward/record.url?eid=2-s2.0-70449506911&partnerID=40&md5=3c472991dacb0d3df5cc8528d2551c69	Article	Final		Scopus	2-s2.0-70449506911	21740969800; 6506092678; 21741453300
bio	Expósito, A.C., García-Muñoz, E., Guerrero, F.	2021	Reptile diversity in a mediterranean wetlands landscape (Alto guadalquivir region, southeastern spain): Are they affected by human impacts?	1	Acta Herpetologica	16	1		27	36		1	10.36253/a_h-9970	https://www.scopus.com/inward/record.url?eid=2-s2.0-85118346651&partnerID=40&md5=e8f10c45f7c8acf0d44d3e8b308f4da3	Article	Final	All Open Access, Gold	Scopus	2-s2.0-85118346651	57320118100; 14063209200; 7005991239
bio	Hicks, J.P., Hails, R.S., Sait, S.M.	2015	Scale-dependent, contrasting effects of habitat fragmentation on host-natural enemy trophic interactions	0	Landscape Ecology	30	8		1371	1385		1	10.1007/s10980-015-0192-6	https://www.scopus.com/inward/record.url?eid=2-s2.0-84940794341&partnerID=40&md5=c9ead85cd8999d547982fb7875cb43d0	Article	Final	All Open Access, Green	Scopus	2-s2.0-84940794341	57192699168; 57203629426; 35557426900
bio	Naoe, S., Sakai, S., Sawa, A., Masaki, T.	2011	Seasonal difference in the effects of fragmentation on seed dispersal by birds in Japanese temperate forests	1	Ecological Research	26	2		301	309		19	10.1007/s11284-010-0783-2	https://www.scopus.com/inward/record.url?eid=2-s2.0-79952746132&partnerID=40&md5=5392d9013a25f69d65b53232da4f28c3	Article	Final		Scopus	2-s2.0-79952746132	36167344500; 7401637534; 26428915500; 7201436128
bio	Diehm, C.	2015	Should extinction be forever? Restitution, restoration, and reviving extinct species	1	Environmental Ethics	37	2		131	143		6	10.5840/enviroethics201537214	https://www.scopus.com/inward/record.url?eid=2-s2.0-84941203957&partnerID=40&md5=0304c51e15ca38e057587e8325711376	Article	Final		Scopus	2-s2.0-84941203957	12764021500
bio	Kasperbauer, T.J.	2017	Should We Bring Back the Passenger Pigeon? The Ethics of De-Extinction	1	Ethics, Policy and Environment	20	1		1	14		14	10.1080/21550085.2017.1291831	https://www.scopus.com/inward/record.url?eid=2-s2.0-85013664553&partnerID=40&md5=9971ed8e7bd76fe7be744af3de206411	Article	Final		Scopus	2-s2.0-85013664553	55884831900
bio	Brosi, B.J., Briggs, H.M.	2013	Single pollinator species losses reduce floral fidelity and plant reproductive function	1	Proceedings of the National Academy of Sciences of the United States of America	110	32		13044	13048		176	10.1073/pnas.1307438110	https://www.scopus.com/inward/record.url?eid=2-s2.0-84881457723&partnerID=40&md5=b02979c0ec0db3d8e6c9b02bc1dc3d25	Article	Final	All Open Access, Bronze, Green	Scopus	2-s2.0-84881457723	6603215696; 55929832300
bio	Plue, J., Baeten, L.	2021	Soil phosphorus availability determines the contribution of small, individual grassland remnants to the conservation of landscape-scale biodiversity	1	Applied Vegetation Science	24	2	e12590				3	10.1111/avsc.12590	https://www.scopus.com/inward/record.url?eid=2-s2.0-85109116472&partnerID=40&md5=d1e2b62f76f66c9f1be87df45572bc40	Article	Final	All Open Access, Hybrid Gold, Green	Scopus	2-s2.0-85109116472	24279182500; 24376142100
bio	Singh, H., Garg, R.D., Karnatak, H.C., Roy, A.	2021	Spatial biodiversity modeling using high-performance computing cluster: A case study to access biological richness in Indian landscape	1	Geocarto International	36	18		2023	2043			10.1080/10106049.2019.1678679	https://www.scopus.com/inward/record.url?eid=2-s2.0-85076492356&partnerID=40&md5=6e9bbf24a741f5db49676e8c4d495791	Article	Final		Scopus	2-s2.0-85076492356	57001966900; 15044199700; 22135067900; 55255923500
bio	Farnham, E.S., Bell, J.J.	2018	Spatial Variation in a Shallow-Water Sponge-Dominated Reef in Timor-Leste (East Timor)	1	Pacific Science	72	2		233	244		9	10.2984/72.2.5	https://www.scopus.com/inward/record.url?eid=2-s2.0-85044968958&partnerID=40&md5=c0ed35aa0f36a72a76492fdac6857b61	Article	Final		Scopus	2-s2.0-85044968958	57201462885; 7404446141
bio	la Mantia, T., Carimi, F., di Lorenzo, R., Pasta, S.	2011	The agricultural heritage of lampedusa (Pelagie archipelago, south Italy) and its key role for cultivar and wildlife conservation	1	Italian Journal of Agronomy	6	2	e17	106	110		18	10.4081/ija.2011.e17	https://www.scopus.com/inward/record.url?eid=2-s2.0-84857281987&partnerID=40&md5=a5b4f6e694103f37bcbd8dbfad7892af	Article	Final	All Open Access, Gold, Green	Scopus	2-s2.0-84857281987	6602277273; 6603794044; 55375267500; 57221237145
bio	Huang, Z.Y.X., Van Langevelde, F., Estrada-Peña, A., Suzán, G., De Boer, W.F.	2016	The diversity-disease relationship: Evidence for and criticisms of the dilution effect	1	Parasitology	143	9		1075	1086		39	10.1017/S0031182016000536	https://www.scopus.com/inward/record.url?eid=2-s2.0-84962087237&partnerID=40&md5=7c69606f68b133248624ea70b8357996	Article	Final		Scopus	2-s2.0-84962087237	55568595900; 6701790743; 7006661691; 7801438528; 7202844050
bio	Futuyma, D.J.	2013	The evolution of evolutionary ecology	0	Israel Journal of Ecology and Evolution	59	4		172	180		4	10.1080/15659801.2013.857227	https://www.scopus.com/inward/record.url?eid=2-s2.0-84904391024&partnerID=40&md5=9f7a789727109a8c7ead7d6db92f6279	Article	Final		Scopus	2-s2.0-84904391024	6603828239
bio	Voultsiadou, E., Tatolas, A.	2005	The fauna of Greece and adjacent areas in the Age of Homer: Evidence from the first written documents of Greek literature	1	Journal of Biogeography	32	11		1875	1882		13	10.1111/j.1365-2699.2005.01335.x	https://www.scopus.com/inward/record.url?eid=2-s2.0-33745368027&partnerID=40&md5=8715f84b1ea4ca58107d0234cf1d37ac	Article	Final		Scopus	2-s2.0-33745368027	6506417838; 14023671400
bio	Assefa, W.W., Eneyew, B.G., Wondie, A.	2021	The impacts of land-use and land-cover change on wetland ecosystem service values in peri-urban and urban area of Bahir Dar City, Upper Blue Nile Basin, Northwestern Ethiopia	0	Ecological Processes	10	1	39				13	10.1186/s13717-021-00310-8	https://www.scopus.com/inward/record.url?eid=2-s2.0-85107529110&partnerID=40&md5=8491d975be34ca6e79b5351f67c1fb81	Article	Final	All Open Access, Gold	Scopus	2-s2.0-85107529110	57203461454; 57212021434; 17343016000
bio	DeMaster, D.P., Trites, A.W., Clapham, P., Mizroch, S., Wade, P., Small, R.J., Hoef, J.V.	2006	The sequential megafaunal collapse hypothesis: Testing with existing data	1	Progress in Oceanography	68	44653		329	342		78	10.1016/j.pocean.2006.02.007	https://www.scopus.com/inward/record.url?eid=2-s2.0-33645868683&partnerID=40&md5=b2100c28ed1bf26778fa9ea6fb20c2a0	Article	Final		Scopus	2-s2.0-33645868683	7005832819; 7004036666; 7005847420; 6603188753; 7102389867; 7202802944; 36962577800
bio	Shonbrun, S.	2012	The sustainability web	0	Sustainability	5	3		198	200			10.1089/SUS.2012.9958	https://www.scopus.com/inward/record.url?eid=2-s2.0-84862174861&partnerID=40&md5=f11f48a5d51da48343cb58c288d860a7	Article	Final		Scopus	2-s2.0-84862174861	36970306700
bio	Burns, P.A., Phillips, B.L.	2020	Time since fire is an over-simplified measure of habitat suitability for the New Holland mouse	1	Journal of Mammalogy	101	2		476	486			10.1093/jmammal/gyz157	https://www.scopus.com/inward/record.url?eid=2-s2.0-85088164051&partnerID=40&md5=48b6b69ca37c03f45cae078d57be37d7	Article	Final		Scopus	2-s2.0-85088164051	57136287800; 7401447415
bio	Ramos-Jiliberto, R., Valdovinos, F.S., Moisset de Espanés, P., Flores, J.D.	2012	Topological plasticity increases robustness of mutualistic networks	1	Journal of Animal Ecology	81	4		896	904		96	10.1111/j.1365-2656.2012.01960.x	https://www.scopus.com/inward/record.url?eid=2-s2.0-84862668968&partnerID=40&md5=ac1ccfb420e7a59e1c2df9e6f573bed3	Article	Final		Scopus	2-s2.0-84862668968	6603081714; 24598355900; 23978296000; 8938207800
bio	Keiter, R.B.	2018	Toward a national conservation network act: Transforming landscape conservation on the public lands into law	1	Harvard Environmental Law Review	42	1		61	138		3		https://www.scopus.com/inward/record.url?eid=2-s2.0-85056870999&partnerID=40&md5=0fa67d7913ffc1f76c82a8cdacd1b31c	Article	Final		Scopus	2-s2.0-85056870999	6603861864
bio	Tessema, Z.K., Ejigu, B., Nigatu, L.	2017	Tree species determine soil seed bank composition and its similarity with understory vegetation in a semi-arid African savanna	1	Ecological Processes	6	1	9				11	10.1186/s13717-017-0075-7	https://www.scopus.com/inward/record.url?eid=2-s2.0-85038072912&partnerID=40&md5=aff189bf1c495c53a63f4f2ccf8c8930	Article	Final	All Open Access, Gold	Scopus	2-s2.0-85038072912	15063507900; 57201203284; 24402089800
bio	Smith, F.A., Tomé, C.P., Elliott Smith, E.A., Lyons, S.K., Newsome, S.D., Stafford, T.W.	2016	Unraveling the consequences of the terminal Pleistocene megafauna extinction on mammal community assembly	1	Ecography	39	2		223	239		25	10.1111/ecog.01779	https://www.scopus.com/inward/record.url?eid=2-s2.0-84956694783&partnerID=40&md5=633523fd407596effdec5a2e60bff38e	Article	Final		Scopus	2-s2.0-84956694783	7402856158; 57021266200; 56514061900; 7102022058; 9437256200; 7004919386
bio	Start, D., Barbour, M.A., Bonner, C.	2020	Urbanization reshapes a food web	1	Journal of Animal Ecology	89	3		808	816		9	10.1111/1365-2656.13136	https://www.scopus.com/inward/record.url?eid=2-s2.0-85076796348&partnerID=40&md5=ad0e9fdc0e069e35d44072cceaf3b437	Article	Final		Scopus	2-s2.0-85076796348	56450491600; 54411861700; 57203099263
bio	Nasim, S., Oussalah, M., Klöve, B., Haghighi, A.T.	2020	Vegetation height estimation using ubiquitous foot-based wearable platform	1	Environmental Monitoring and Assessment	192	12	774					10.1007/s10661-020-08712-5	https://www.scopus.com/inward/record.url?eid=2-s2.0-85096340096&partnerID=40&md5=3c8753333b6ad2821ef7dd89af19fb7f	Article	Final	All Open Access, Hybrid Gold, Green	Scopus	2-s2.0-85096340096	57205022221; 55587723600; 6602979743; 56373737700
bio	Yan, H.-F., Zhang, C.-Y., Anderberg, A.A., Hao, G., Ge, X.-J., Wiens, J.J.	2018	What explains high plant richness in East Asia? Time and diversification in the tribe Lysimachieae (Primulaceae)	1	New Phytologist	219	1		436	448		20	10.1111/nph.15144	https://www.scopus.com/inward/record.url?eid=2-s2.0-85047795119&partnerID=40&md5=4d412381ca761ec9a46bb20f79f54438	Article	Final	All Open Access, Bronze	Scopus	2-s2.0-85047795119	35367528500; 56621561700; 55898392800; 7005935343; 7202715241; 7007159965
bio	Pimiento, C., Clements, C.F.	2014	When did Carcharocles megalodon become extinct? A new analysis of the fossil record	1	PLoS ONE	9	10	A1821				43	10.1371/journal.pone.0111086	https://www.scopus.com/inward/record.url?eid=2-s2.0-84908381114&partnerID=40&md5=138340b02703a37694e2dc01b51f2808	Article	Final	All Open Access, Gold, Green	Scopus	2-s2.0-84908381114	36458725100; 55386841500
