# Supplementary material for: Better integration of chemical pollution research will further our understanding of biodiversity loss
Source: Springer Nature journal article supplement (doi:10.1038/s41559-023-02117-6), 2023-06-29
Supplement: MOESM3 [file 41559_2023_2117_MOESM3_ESM.xlsx]

## Sheet: chem
Year	Number of papers
2021	3603
2020	3303
2019	2940
2018	2617
2017	2340
2016	2341
2015	2072
2014	1832
2013	1539
2012	1483
2011	1497
2010	1384
2009	1125
2008	1018
2007	835
2006	774
2005	597
2004	496
2003	435
2002	408
2001	393
2000	238
1999	234
1998	178
1997	146
1996	147
1995	129
1994	144
1993	128
1992	77
1991	81
1990	72

## Sheet: cc
Year	Number of papers
2021	6398
2020	5404
2019	4714
2018	4372
2017	3930
2016	3820
2015	3447
2014	2989
2013	2978
2012	2561
2011	2376
2010	2053
2009	1578
2008	1183
2007	937
2006	711
2005	536
2004	423
2003	355
2002	332
2001	274
2000	283
1999	235
1998	144
1997	141
1996	123
1995	113
1994	89
1993	80
1992	57
1991	52
1990	36

## Sheet: land
Year	Number of papers
2021	3630
2020	3143
2019	2748
2018	2787
2017	2532
2016	2287
2015	2147
2014	1917
2013	2119
2012	1939
2011	1947
2010	1631
2009	1385
2008	980
2007	906
2006	665
2005	503
2004	456
2003	384
2002	340
2001	292
2000	229
1999	264
1998	118
1997	100
1996	107
1995	108
1994	87
1993	75
1992	60
1991	65
1990	59

## Sheet: nis
Year	Number of papers
2021	1858
2020	1731
2019	1613
2018	1574
2017	1548
2016	1456
2015	1398
2014	1306
2013	1351
2012	1287
2011	1347
2010	1222
2009	997
2008	812
2007	677
2006	585
2005	372
2004	304
2003	252
2002	242
2001	177
2000	141
1999	112
1998	75
1997	44
1996	46
1995	28
1994	15
1993	13
1992	12
1991	14
1990	15

## Sheet: bio
Year	Number of papers
2021	1564
2020	1387
2019	1265
2018	1308
2017	1224
2016	1222
2015	1119
2014	952
2013	1163
2012	993
2011	1098
2010	964
2009	788
2008	598
2007	586
2006	407
2005	265
2004	199
2003	188
2002	189
2001	110
2000	89
1999	86
1998	68
1997	31
1996	40
1995	27
1994	29
1993	16
1992	9
1991	7
1990	5
