# Supplementary material for: Better integration of chemical pollution research will further our understanding of biodiversity loss
Source: Springer Nature journal article supplement (doi:10.1038/s41559-023-02117-6), 2023-06-29
Supplement: MOESM4 [file 41559_2023_2117_MOESM4_ESM.xlsx]

## Sheet: chem
		#papers	#journals	papers/journal
	total number of results	34606	NA
	total shown	29701	158
	in yellow: most used journals by topic publishing 50% of the papers	17228	11	1566.18
Rank	Journal	Absolut number of papers published	Cummulative percentage of papers published
1	Science Of The Total Environment	3303	0.0954459
2	Chemosphere	2141	0.157314
3	Environmental Pollution	2023	0.215772
4	Marine Pollution Bulletin	1613	0.262382
5	Environmental Science And Pollution Research	1551	0.307201
6	Environmental Science And Technology	1488	0.350199
7	Environmental Toxicology And Chemistry	1354	0.389326
8	Ecotoxicology And Environmental Safety	1122	0.421748
9	Environmental Monitoring And Assessment	1088	0.453187
10	Aquatic Toxicology	784	0.475842
11	Journal Of Hazardous Materials	761	0.497833
12	Ecotoxicology	565	0.514159
13	Bulletin Of Environmental Contamination And Toxicology	552	0.53011
14	Water Research	476	0.543865
15	Archives Of Environmental Contamination And Toxicology	469	0.557418
16	Huanjing Kexue Environmental Science	410	0.569265
17	Plos One	375	0.580102
18	Journal Of Environmental Management	349	0.590187
19	Water Air And Soil Pollution	327	0.599636
20	Water Science And Technology	312	0.608652
21	International Journal Of Environmental Research And Public Health	287	0.616945
22	Marine Environmental Research	263	0.624545
23	Environmental Research	226	0.631076
24	Scientific Reports	215	0.637288
25	Environment International	201	0.643097
26	Ecological Indicators	180	0.648298
27	Journal Of Environmental Quality	180	0.653499
28	Integrated Environmental Assessment And Management	174	0.658527
29	Ecological Applications	170	0.66344
30	Pest Management Science	170	0.668352
31	Bioresource Technology	167	0.673178
32	Journal Of Environmental Science And Health Part A Toxic Hazardous Substances And Environmental Engineering	150	0.677513
33	Journal Of Environmental Science And Health Part B Pesticides Food Contaminants And Agricultural Wastes	140	0.681558
34	Applied And Environmental Microbiology	136	0.685488
35	Water Switzerland	130	0.689245
36	Environmental Geochemistry And Health	128	0.692943
37	Journal Of Contaminant Hydrology	126	0.696584
38	Chinese Journal Of Applied Ecology	123	0.700139
39	Journal Of Environmental Sciences China	122	0.703664
40	Ecological Engineering	120	0.707132
41	Atmospheric Environment	119	0.71057
42	Agriculture Ecosystems And Environment	118	0.71398
43	Environmental Management	115	0.717303
44	Environmental Technology United Kingdom	114	0.720598
45	Forest Ecology And Management	114	0.723892
46	Journal Of Agricultural And Food Chemistry	114	0.727186
47	Weed Science	114	0.73048
48	Crop Protection	111	0.733688
49	Journal Of Applied Ecology	104	0.736693
50	Journal Of Environmental Monitoring	101	0.739612
51	Environmental Toxicology	99	0.742472
52	Proceedings Of The National Academy Of Sciences Of The United States Of America	91	0.745102
53	Water Environment Research	90	0.747703
54	Weed Technology	88	0.750246
55	Journal Of Cleaner Production	85	0.752702
56	Environmental Earth Sciences	81	0.755042
57	Ecological Modelling	80	0.757354
58	Journal Of Environmental Radioactivity	76	0.75955
59	Journal Of Economic Entomology	70	0.761573
60	Soil Biology And Biochemistry	70	0.763596
61	Environmental Science Processes And Impacts	69	0.76559
62	Environmental Toxicology And Pharmacology	69	0.767584
63	Nongye Gongcheng Xuebao Transactions Of The Chinese Society Of Agricultural Engineering	69	0.769578
64	Journal Of Environmental Sciences	67	0.771514
65	Comparative Biochemistry And Physiology Part C Toxicology And Pharmacology	60	0.773247
66	Environmental Health Perspectives	59	0.774952
67	Environmental Entomology	58	0.776628
68	Journal Of Environmental Biology	58	0.778304
69	International Journal Of Phytoremediation	57	0.779951
70	Ambio	55	0.781541
71	Fresenius Environmental Bulletin	55	0.78313
72	Restoration Ecology	53	0.784662
73	Journal Of Soils And Sediments	52	0.786164
74	Toxicological And Environmental Chemistry	51	0.787638
75	Waste Management	50	0.789083
76	Nature Environment And Pollution Technology	47	0.790441
77	Weed Research	46	0.79177
78	FEMS Microbiology Ecology	45	0.793071
79	Journal Of Toxicology And Environmental Health Part A Current Issues	44	0.794342
80	Environmental Microbiology	43	0.795585
81	Hydrobiologia	43	0.796827
82	International Biodeterioration And Biodegradation	43	0.79807
83	Pestology	43	0.799312
84	Rangeland Ecology And Management	43	0.800555
85	Huanjing Kexue Xuebao Acta Scientiae Circumstantiae	42	0.801768
86	International Journal Of Environmental Science And Technology	42	0.802982
87	Journal Of Chemical Ecology	41	0.804167
88	Biodegradation	40	0.805323
89	Microbial Ecology	40	0.806479
90	Environmental Sciences Europe	39	0.807606
91	Shengtai Xuebao Acta Ecologica Sinica	38	0.808704
92	Zhongguo Huanjing Kexue China Environmental Science	38	0.809802
93	Journal Of Great Lakes Research	36	0.810842
94	Oecologia	36	0.811882
95	Environmental Sciences Processes And Impacts	35	0.812894
96	Proceedings Of The Royal Society B Biological Sciences	35	0.813905
97	Soil And Sediment Contamination	34	0.814888
98	Environmental Research Letters	33	0.815841
99	Molecular Ecology	33	0.816795
100	NCASI Technical Bulletin	33	0.817748
101	Ecology	32	0.818673
102	Peerj	32	0.819598
103	Reviews Of Environmental Contamination And Toxicology	32	0.820522
104	Science Of The Total Environment The	32	0.821447
105	Water Air Soil Pollution	32	0.822372
106	Critical Reviews In Environmental Science And Technology	31	0.823268
107	Journal Of Applied Entomology	31	0.824163
108	Journal Of Hydrology	31	0.825059
109	Acta Tropica	30	0.825926
110	Journal Of Chemical Technology And Biotechnology	30	0.826793
111	Science	30	0.82766
112	Sustainability	30	0.828527
113	Chemical Engineering Journal	29	0.829365
114	Pollution Research	29	0.830203
115	International Journal Of Environmental Analytical Chemistry	28	0.831012
116	Journal Of Vector Ecology	28	0.831821
117	Gigiena I Sanitariia	27	0.832601
118	Nature	27	0.833381
119	Ecological Economics	26	0.834133
120	Forestry Chronicle	26	0.834884
121	Journal Of Medical Entomology	26	0.835635
122	Journal Of The Air And Waste Management Association	26	0.836387
123	Journal Of The American Mosquito Control Association	26	0.837138
124	Applied Geochemistry	25	0.83786
125	Fish And Shellfish Immunology	25	0.838583
126	Journal Of Environmental Chemical Engineering	25	0.839305
127	Bulletin Of Entomological Research	24	0.839999
128	Global Change Biology	23	0.840663
129	Mutation Research Genetic Toxicology And Environmental Mutagenesis	23	0.841328
130	Philosophical Transactions Of The Royal Society B Biological Sciences	23	0.841993
131	Biological Conservation	22	0.842628
132	Canadian Journal Of Forest Research	22	0.843264
133	Industrial Crops And Products	22	0.8439
134	Natural Areas Journal	22	0.844536
135	Pesticide Biochemistry And Physiology	22	0.845171
136	Desalination And Water Treatment	21	0.845778
137	Food Chemistry	21	0.846385
138	Geoderma	21	0.846992
139	Hydrobiological Journal	21	0.847599
140	International Journal Of Pest Management	21	0.848206
141	Toxicology And Industrial Health	21	0.848812
142	Entomologia Experimentalis Et Applicata	20	0.84939
143	Journal Of Geochemical Exploration	20	0.849968
144	Scientific World Journal	20	0.850546
145	Water SA	20	0.851124
146	Applied Soil Ecology	19	0.851673
147	Biological Invasions	19	0.852222
148	Ecohealth	19	0.852771
149	Ecology Environment And Conservation	19	0.85332
150	Frontiers In Marine Science	19	0.853869
151	Groundwater	19	0.854418
152	Heliyon	19	0.854967
153	Insects	19	0.855516
154	Journal Of Ecology And Rural Environment	19	0.856065
155	Journal Of Food Agriculture And Environment	19	0.856614
156	Journal Of The American Water Resources Association	19	0.857163
157	Kexue Tongbao Chinese Science Bulletin	19	0.857713
158	Parasitology Research	19	0.858262

## Sheet: cc
		#papers	#journals	papers/journal
	total number of results	52724	NA
	total shown	36159	158
	in yellow: most used journals by topic publishing 50% of the papers	26344	68	387.412
Rank	Journal	Absolut number of papers published	Cummulative percentage of papers published
1	Global Change Biology	2193	0.041594
2	Science Of The Total Environment	1714	0.0741029
3	Plos One	1609	0.10462
4	Forest Ecology And Management	886	0.121425
5	Proceedings Of The National Academy Of Sciences Of The United States Of America	732	0.135308
6	Ecological Indicators	669	0.147997
7	Climatic Change	634	0.160022
8	Shengtai Xuebao Acta Ecologica Sinica	621	0.1718
9	Ecology	560	0.182422
10	Sustainability	559	0.193024
11	Ecological Modelling	544	0.203342
12	Scientific Reports	535	0.213489
13	Environmental Research Letters	526	0.223466
14	Forests	520	0.233328
15	Remote Sensing	433	0.241541
16	Ecological Applications	418	0.249469
17	Water Switzerland	395	0.256961
18	Agricultural And Forest Meteorology	382	0.264206
19	Oecologia	379	0.271394
20	Journal Of Ecology	371	0.278431
21	Journal Of Environmental Management	362	0.285297
22	Geophysical Research Letters	361	0.292144
23	Marine Ecology Progress Series	360	0.298972
24	Quaternary Science Reviews	331	0.30525
25	Proceedings Of The Royal Society B Biological Sciences	328	0.311471
26	Soil Biology And Biochemistry	322	0.317578
27	Journal Of Biogeography	315	0.323553
28	Journal Of Cleaner Production	311	0.329451
29	Nature	308	0.335293
30	Biogeosciences	303	0.34104
31	Ecosystems	303	0.346787
32	Ecology And Evolution	300	0.352477
33	Journal Of Hydrology	291	0.357996
34	Environmental Monitoring And Assessment	277	0.36325
35	Journal Of Geophysical Research Biogeosciences	270	0.368371
36	Global Ecology And Biogeography	261	0.373321
37	Science	249	0.378044
38	Journal Of Animal Ecology	245	0.382691
39	Remote Sensing Of Environment	244	0.387319
40	New Phytologist	242	0.391909
41	Chinese Journal Of Applied Ecology	232	0.396309
42	Diversity And Distributions	226	0.400596
43	Ecosphere	226	0.404882
44	Hydrobiologia	224	0.409131
45	Journal Of Applied Ecology	224	0.413379
46	Environmental Management	223	0.417609
47	Biological Conservation	220	0.421781
48	Environmental Science And Technology	220	0.425954
49	Hydrological Processes	210	0.429937
50	Peerj	210	0.43392
51	Agriculture Ecosystems And Environment	207	0.437846
52	Functional Ecology	205	0.441734
53	Ambio	202	0.445566
54	Global Environmental Change	201	0.449378
55	Palaeogeography Palaeoclimatology Palaeoecology	200	0.453171
56	Polar Biology	199	0.456946
57	Frontiers In Marine Science	198	0.460701
58	Global And Planetary Change	197	0.464437
59	Journal Of Industrial Ecology	197	0.468174
60	Estuarine Coastal And Shelf Science	196	0.471891
61	Marine Pollution Bulletin	191	0.475514
62	Ecography	185	0.479023
63	Environmental Pollution	184	0.482513
64	Environmental Science And Policy	184	0.486003
65	Climate Research	181	0.489436
66	Regional Environmental Change	181	0.492869
67	Canadian Journal Of Forest Research	179	0.496264
68	Ecological Engineering	179	0.499659
69	Progress In Oceanography	178	0.503035
70	Ecological Economics	176	0.506373
71	Nature Climate Change	176	0.509711
72	Ecology And Society	171	0.512954
73	Ecology Letters	170	0.516179
74	Deep Sea Research Part II Topical Studies In Oceanography	167	0.519346
75	Water Resources Research	166	0.522494
76	Molecular Ecology	165	0.525624
77	Philosophical Transactions Of The Royal Society B Biological Sciences	165	0.528754
78	Geoderma	164	0.531864
79	Biodiversity And Conservation	163	0.534956
80	Marine Environmental Research	161	0.538009
81	Global Biogeochemical Cycles	158	0.541006
82	Conservation Biology	157	0.543984
83	Landscape Ecology	154	0.546905
84	Ecohydrology	152	0.549788
85	ICES Journal Of Marine Science	150	0.552633
86	Plant And Soil	150	0.555478
87	Environmental Science And Pollution Research	148	0.558285
88	Ocean And Coastal Management	145	0.561035
89	Catena	142	0.563728
90	Holocene	141	0.566402
91	Environmental Earth Sciences	140	0.569058
92	Hydrology And Earth System Sciences	139	0.571694
93	Atmospheric Environment	134	0.574236
94	Biogeochemistry	134	0.576777
95	International Journal Of Environmental Research And Public Health	132	0.579281
96	Oikos	132	0.581784
97	Journal Of Vegetation Science	130	0.58425
98	International Journal Of Climatology	129	0.586697
99	Journal Of Arid Environments	129	0.589143
100	Freshwater Biology	128	0.591571
101	Journal Of Marine Systems	127	0.59398
102	Mitigation And Adaptation Strategies For Global Change	122	0.596294
103	Ecological Research	118	0.598532
104	Austral Ecology	113	0.600675
105	Biology Letters	112	0.602799
106	Journal Of Experimental Marine Biology And Ecology	105	0.604791
107	Land Degradation And Development	105	0.606782
108	Limnology And Oceanography	105	0.608774
109	Plant Ecology	105	0.610765
110	Quaternary International	102	0.6127
111	Estuaries And Coasts	99	0.614578
112	Nongye Gongcheng Xuebao Transactions Of The Chinese Society Of Agricultural Engineering	99	0.616456
113	International Journal Of Remote Sensing	98	0.618314
114	Journal Of Geophysical Research Atmospheres	98	0.620173
115	Marine Policy	98	0.622032
116	Annals Of Botany	97	0.623871
117	International Journal Of Biometeorology	97	0.625711
118	Chinese Journal Of Ecology	91	0.627437
119	Journal Of Paleolimnology	91	0.629163
120	Biological Invasions	90	0.63087
121	Theoretical And Applied Climatology	90	0.632577
122	American Journal Of Botany	89	0.634265
123	Annals Of Forest Science	89	0.635953
124	Journal Of Climate	89	0.637641
125	Environmental Modelling And Software	88	0.63931
126	Tree Physiology	88	0.640979
127	Aquatic Conservation Marine And Freshwater Ecosystems	87	0.64263
128	Science Advances	87	0.64428
129	Coral Reefs	84	0.645873
130	Ecological Monographs	84	0.647466
131	Ecological Informatics	82	0.649021
132	Wetlands	82	0.650577
133	Marine And Freshwater Research	80	0.652094
134	American Naturalist	78	0.653573
135	Arctic Antarctic And Alpine Research	78	0.655053
136	Frontiers In Ecology And Evolution	78	0.656532
137	Marine Biology	78	0.658012
138	Trees Structure And Function	78	0.659491
139	Climate And Development	75	0.660913
140	Journal Of Coastal Research	75	0.662336
141	Land Use Policy	75	0.663758
142	Chemosphere	74	0.665162
143	Climate Dynamics	74	0.666566
144	Dili Xuebao Acta Geographica Sinica	74	0.667969
145	Environment Development And Sustainability	71	0.669316
146	Journal Of Thermal Biology	70	0.670643
147	Urban Forestry And Urban Greening	70	0.671971
148	Environmental And Experimental Botany	69	0.67328
149	Frontiers In Plant Science	69	0.674588
150	Atmosphere	68	0.675878
151	Environmental Research	68	0.677168
152	Landscape And Urban Planning	68	0.678458
153	Gcb Bioenergy	66	0.679709
154	Restoration Ecology	66	0.680961
155	Environmental Conservation	65	0.682194
156	Aquatic Sciences	64	0.683408
157	Geology	64	0.684622
158	BMC Evolutionary Biology	63	0.685817

## Sheet: land
		#papers	#journals	papers/journal
	total number of results	36010	NA
	total shown	25613	158
	in yellow: most used journals by topic publishing 50% of the papers	17940	56	320.357
Rank	Journal	Absolut number of papers published	Cummulative percentage of papers published
1	Science Of The Total Environment	1009	0.02802
2	Ecological Indicators	852	0.0516801
3	Forest Ecology And Management	841	0.0750347
4	Biological Conservation	786	0.096862
5	Landscape Ecology	761	0.117995
6	Shengtai Xuebao Acta Ecologica Sinica	709	0.137684
7	Plos One	695	0.156984
8	Sustainability	599	0.173618
9	Ecological Applications	554	0.189003
10	Journal Of Environmental Management	447	0.201416
11	Global Change Biology	440	0.213635
12	Biodiversity And Conservation	437	0.225771
13	Journal Of Applied Ecology	430	0.237712
14	Landscape And Urban Planning	418	0.24932
15	Environmental Management	401	0.260455
16	Agriculture Ecosystems And Environment	398	0.271508
17	Environmental Monitoring And Assessment	389	0.28231
18	Conservation Biology	387	0.293057
19	Ecological Modelling	380	0.30361
20	Land Use Policy	373	0.313968
21	Remote Sensing	341	0.323438
22	Ecology	318	0.332269
23	Environmental Research Letters	301	0.340628
24	Ecological Engineering	275	0.348264
25	Forests	265	0.355623
26	Proceedings Of The National Academy Of Sciences Of The United States Of America	259	0.362816
27	Remote Sensing Of Environment	249	0.369731
28	Chinese Journal Of Applied Ecology	247	0.37659
29	Land Degradation And Development	217	0.382616
30	Oecologia	196	0.388059
31	Diversity And Distributions	193	0.393418
32	Ecology And Society	190	0.398695
33	Journal Of Ecology	180	0.403693
34	Biotropica	177	0.408609
35	Water Switzerland	174	0.413441
36	Catena	173	0.418245
37	Ecological Economics	171	0.422994
38	Ecosystems	166	0.427603
39	Ecography	164	0.432158
40	Journal Of Biogeography	158	0.436545
41	Journal Of Arid Environments	157	0.440905
42	Nongye Gongcheng Xuebao Transactions Of The Chinese Society Of Agricultural Engineering	156	0.445237
43	Land	155	0.449542
44	Austral Ecology	154	0.453818
45	Proceedings Of The Royal Society B Biological Sciences	149	0.457956
46	Environmental Earth Sciences	145	0.461983
47	Chinese Journal Of Ecology	143	0.465954
48	Geoderma	138	0.469786
49	Journal Of Hydrology	133	0.47348
50	International Journal Of Remote Sensing	132	0.477145
51	Restoration Ecology	129	0.480728
52	Climatic Change	127	0.484254
53	International Journal Of Environmental Research And Public Health	127	0.487781
54	Aquatic Conservation Marine And Freshwater Ecosystems	126	0.49128
55	Journal Of Animal Ecology	126	0.494779
56	Dili Xuebao Acta Geographica Sinica	123	0.498195
57	Soil Biology And Biochemistry	123	0.501611
58	Applied Geography	122	0.504999
59	Hydrobiologia	122	0.508387
60	Ambio	120	0.511719
61	Conservation Genetics	120	0.515051
62	Environmental Conservation	120	0.518384
63	Global Environmental Change	120	0.521716
64	Ocean And Coastal Management	120	0.525049
65	Wetlands	120	0.528381
66	Biogeosciences	119	0.531686
67	Journal Of Wildlife Management	112	0.534796
68	Marine Pollution Bulletin	110	0.537851
69	Oikos	108	0.54085
70	Ecological Research	106	0.543793
71	Environmental Science And Pollution Research	106	0.546737
72	Marine Ecology Progress Series	106	0.549681
73	Journal Of Insect Conservation	105	0.552597
74	Nature	105	0.555512
75	Estuarine Coastal And Shelf Science	103	0.558373
76	Agricultural And Forest Meteorology	102	0.561205
77	American Journal Of Primatology	102	0.564038
78	Regional Environmental Change	102	0.56687
79	Molecular Ecology	100	0.569647
80	Scientific Reports	100	0.572424
81	Global Ecology And Biogeography	98	0.575146
82	Science	92	0.577701
83	African Journal Of Ecology	91	0.580228
84	Environmental Science And Policy	91	0.582755
85	Quaternary Science Reviews	91	0.585282
86	Journal Of Cleaner Production	88	0.587726
87	Journal Of Vegetation Science	86	0.590114
88	Canadian Journal Of Forest Research	85	0.592474
89	Journal Of Geophysical Research Biogeosciences	85	0.594835
90	Environmental Science And Technology	84	0.597167
91	ORYX	83	0.599472
92	Urban Forestry And Urban Greening	82	0.60175
93	Ecology Letters	80	0.603971
94	Environmental Modelling And Software	79	0.606165
95	Biological Invasions	78	0.608331
96	Ecohydrology	78	0.610497
97	Water Resources Research	78	0.612663
98	Peerj	76	0.614774
99	Acta Oecologica	74	0.616829
100	Journal Of Mammalogy	74	0.618884
101	NCASI Technical Bulletin	74	0.620939
102	Hydrological Processes	73	0.622966
103	Ecological Informatics	72	0.624965
104	Environment Development And Sustainability	71	0.626937
105	Agroforestry Systems	70	0.628881
106	Ecology And Evolution	70	0.630825
107	Holocene	70	0.632769
108	Hydrology And Earth System Sciences	70	0.634713
109	Journal Of Land Use Science	68	0.636601
110	Ecosphere	66	0.638434
111	Environmental Pollution	66	0.640267
112	Geophysical Research Letters	66	0.642099
113	Global Biogeochemical Cycles	66	0.643932
114	Human Ecology	66	0.645765
115	Mountain Research And Development	65	0.64757
116	Plant And Soil	65	0.649375
117	Wetlands Ecology And Management	64	0.651152
118	Chinese Geographical Science	63	0.652902
119	Global And Planetary Change	63	0.654651
120	International Journal Of Sustainable Development And World Ecology	63	0.656401
121	Philosophical Transactions Of The Royal Society B Biological Sciences	63	0.658151
122	Animal Conservation	62	0.659872
123	Functional Ecology	62	0.661594
124	Tropical Ecology	62	0.663316
125	Plant Ecology	61	0.66501
126	Marine And Freshwater Research	60	0.666676
127	Rangeland Ecology And Management	60	0.668342
128	Ecological Management And Restoration	59	0.669981
129	Frontiers In Ecology And The Environment	58	0.671591
130	Natural Areas Journal	58	0.673202
131	American Naturalist	57	0.674785
132	Canadian Journal Of Zoology	57	0.676368
133	Journal For Nature Conservation	56	0.677923
134	Ecosystem Services	55	0.67945
135	Estuaries And Coasts	55	0.680978
136	Journal Of Tropical Ecology	54	0.682477
137	Fresenius Environmental Bulletin	52	0.683921
138	Forest Policy And Economics	51	0.685337
139	International Journal Of Applied Earth Observation And Geoinformation	51	0.686754
140	Journal Of The American Water Resources Association	51	0.68817
141	Arabian Journal Of Geosciences	50	0.689558
142	Environmental Entomology	50	0.690947
143	Gcb Bioenergy	49	0.692308
144	Global Ecology And Conservation	48	0.693641
145	International Journal Of Primatology	48	0.694974
146	Landscape Research	48	0.696307
147	Wildlife Research	48	0.69764
148	Ecological Processes	47	0.698945
149	Journal Of Coastal Research	46	0.700222
150	Mammalian Biology	46	0.7015
151	Journal Of Ecology And Rural Environment	45	0.702749
152	Journal Of Forestry Research	45	0.703999
153	Journal Of Great Lakes Research	45	0.705249
154	Biogeochemistry	44	0.70647
155	Journal Of The Indian Society Of Remote Sensing	44	0.707692
156	Atmospheric Environment	43	0.708886
157	Frontiers In Ecology And Evolution	43	0.710081
158	Pacific Conservation Biology	43	0.711275

## Sheet: nis
		#papers	#journals	papers/journal
	total number of results	22624	NA
	total shown	15992	158
	in yellow: most used journals by topic publishing 50% of the papers	11344	58	195.586
Rank	Journal	Absolut number of papers published	Cummulative percentage of papers published
1	Biological Invasions	1703	0.075274
2	Plos One	746	0.108248
3	Ecology	426	0.127077
4	Ecological Applications	348	0.142459
5	Journal Of Applied Ecology	339	0.157443
6	Forest Ecology And Management	334	0.172207
7	Hydrobiologia	313	0.186041
8	Oecologia	312	0.199832
9	Diversity And Distributions	304	0.213269
10	Biological Conservation	297	0.226397
11	Restoration Ecology	274	0.238508
12	Science Of The Total Environment	257	0.249867
13	Journal Of Ecology	234	0.26021
14	Scientific Reports	201	0.269095
15	Journal Of Great Lakes Research	198	0.277847
16	Austral Ecology	196	0.28651
17	Marine Ecology Progress Series	189	0.294864
18	Plant Ecology	168	0.30229
19	Journal Of Environmental Management	160	0.309362
20	Marine Pollution Bulletin	158	0.316345
21	Biodiversity And Conservation	156	0.323241
22	Conservation Biology	151	0.329915
23	Environmental Entomology	150	0.336545
24	Aquatic Invasions	146	0.342999
25	Ecological Modelling	142	0.349275
26	Proceedings Of The National Academy Of Sciences Of The United States Of America	139	0.355419
27	Global Change Biology	138	0.361519
28	Aquatic Conservation Marine And Freshwater Ecosystems	132	0.367353
29	Freshwater Biology	127	0.372967
30	Proceedings Of The Royal Society B Biological Sciences	126	0.378536
31	Rangeland Ecology And Management	126	0.384105
32	Ecological Indicators	123	0.389542
33	Environmental Management	120	0.394846
34	Molecular Ecology	117	0.400018
35	Ecological Engineering	113	0.405012
36	Ecology And Evolution	111	0.409919
37	Peerj	110	0.414781
38	Forests	109	0.419599
39	Estuarine Coastal And Shelf Science	108	0.424372
40	Oikos	107	0.429102
41	Ecology Letters	105	0.433743
42	Ecosphere	101	0.438207
43	New Zealand Journal Of Ecology	101	0.442671
44	Journal Of Vegetation Science	100	0.447092
45	Russian Journal Of Biological Invasions	100	0.451512
46	Journal Of Arid Environments	97	0.455799
47	Global Ecology And Biogeography	93	0.45991
48	Journal Of Animal Ecology	93	0.464021
49	Journal Of Experimental Marine Biology And Ecology	93	0.468131
50	Marine Environmental Research	93	0.472242
51	Acta Oecologica	90	0.47622
52	Journal Of Biogeography	90	0.480198
53	Bioinvasions Records	81	0.483778
54	Natural Areas Journal	81	0.487359
55	Wildlife Research	81	0.490939
56	Management Of Biological Invasions	80	0.494475
57	Ecography	79	0.497967
58	Ecological Research	78	0.501414
59	Environmental Biology Of Fishes	78	0.504862
60	Canadian Journal Of Fisheries And Aquatic Sciences	75	0.508177
61	Ecosystems	75	0.511492
62	Functional Ecology	75	0.514807
63	New Phytologist	75	0.518122
64	Wetlands	75	0.521437
65	Neobiota	73	0.524664
66	Diversity	70	0.527758
67	Aquatic Botany	69	0.530808
68	Marine Biology	69	0.533858
69	Plant And Soil	68	0.536864
70	American Journal Of Botany	67	0.539825
71	Marine And Freshwater Research	66	0.542742
72	Pacific Science	65	0.545615
73	Chinese Journal Of Ecology	64	0.548444
74	Shengtai Xuebao Acta Ecologica Sinica	64	0.551273
75	American Naturalist	63	0.554058
76	Ecological Economics	63	0.556842
77	South African Journal Of Botany	63	0.559627
78	Pacific Conservation Biology	60	0.562279
79	North American Journal Of Fisheries Management	59	0.564887
80	Transactions Of The American Fisheries Society	59	0.567495
81	Ecological Management And Restoration	58	0.570058
82	Soil Biology And Biochemistry	58	0.572622
83	Landscape And Urban Planning	57	0.575141
84	Estuaries And Coasts	56	0.577617
85	Journal Of Theoretical Biology	56	0.580092
86	Landscape Ecology	56	0.582567
87	Environmental Monitoring And Assessment	55	0.584998
88	Journal Of Chemical Ecology	55	0.587429
89	Journal Of Fish Biology	55	0.58986
90	Urban Forestry And Urban Greening	55	0.592291
91	Journal Of The Torrey Botanical Society	54	0.594678
92	Shengtai Xuebao	54	0.597065
93	American Midland Naturalist	53	0.599408
94	Ecological Entomology	53	0.60175
95	Weed Research	53	0.604093
96	Annals Of Botany	51	0.606347
97	Aquatic Ecology	51	0.608601
98	Flora Morphology Distribution Functional Ecology Of Plants	50	0.610812
99	Biology Letters	48	0.612933
100	Invasive Plant Science And Management	48	0.615055
101	Florida Entomologist	47	0.617132
102	Rangelands	47	0.61921
103	Freshwater Science	46	0.621243
104	Frontiers In Ecology And Evolution	46	0.623276
105	Science	45	0.625265
106	Limnologica	44	0.62721
107	Water Switzerland	44	0.629155
108	Bulletin Of Entomological Research	43	0.631056
109	Environmental Science And Pollution Research	43	0.632956
110	Journal For Nature Conservation	43	0.634857
111	Journal Of Wildlife Management	42	0.636713
112	Sustainability	41	0.638525
113	Agriculture Ecosystems And Environment	40	0.640293
114	Biotropica	40	0.642062
115	Canadian Journal Of Forest Research	40	0.64383
116	Evolution	40	0.645598
117	Population Ecology	40	0.647366
118	Weed Science	40	0.649134
119	Zootaxa	40	0.650902
120	Animal Conservation	39	0.652626
121	Applied Vegetation Science	39	0.654349
122	Chinese Journal Of Applied Ecology	39	0.656073
123	Knowledge And Management Of Aquatic Ecosystems	39	0.657797
124	Entomologia Experimentalis Et Applicata	38	0.659477
125	African Journal Of Ecology	37	0.661112
126	Journal Of The Marine Biological Association Of The United Kingdom	37	0.662748
127	Urban Ecosystems	37	0.664383
128	Fundamental And Applied Limnology	36	0.665974
129	Journal Of Insect Conservation	36	0.667565
130	Nature	36	0.669157
131	Northwest Science	36	0.670748
132	Pest Management Science	36	0.672339
133	Polar Biology	36	0.67393
134	River Research And Applications	35	0.675477
135	Conservation Genetics	34	0.67698
136	ORYX	34	0.678483
137	Perspectives In Plant Ecology Evolution And Systematics	34	0.679986
138	Ecological Informatics	33	0.681444
139	Ecology Of Freshwater Fish	33	0.682903
140	Wetlands Ecology And Management	32	0.684318
141	Canadian Journal Of Zoology	31	0.685688
142	Preslia	31	0.687058
143	Journal Of Economic Entomology	30	0.688384
144	Tropical Ecology	30	0.68971
145	Journal Of Evolutionary Biology	29	0.690992
146	Journal Of Plankton Research	29	0.692274
147	Remote Sensing Of Environment	29	0.693556
148	Aquatic Sciences	28	0.694793
149	Environmental Conservation	28	0.696031
150	Journal Of Freshwater Ecology	28	0.697268
151	Remote Sensing	28	0.698506
152	Australian Journal Of Botany	27	0.699699
153	BMC Ecology	27	0.700893
154	Ecological Monographs	27	0.702086
155	Frontiers In Ecology And The Environment	27	0.70328
156	Helgoland Marine Research	27	0.704473
157	Insects	27	0.705667
158	Journal Of Pest Science	27	0.70686

## Sheet: bio
		#papers	#journals	papers/journal
	total number of results	17996	NA
	total shown	13961	158
	in yellow: most used journals by topic publishing 50% of the papers	9023	37	243.865
Rank	Journal	Absolut number of papers published	Cummulative percentage of papers published
1	Biological Conservation	711	0.0395088
2	Plos One	697	0.0782396
3	Forest Ecology And Management	427	0.101967
4	Biodiversity And Conservation	393	0.123805
5	Conservation Biology	391	0.145532
6	Proceedings Of The National Academy Of Sciences Of The United States Of America	368	0.165981
7	Ecology	357	0.185819
8	Journal Of Applied Ecology	353	0.205435
9	Ecological Indicators	349	0.224828
10	Ecological Applications	326	0.242943
11	Proceedings Of The Royal Society B Biological Sciences	318	0.260613
12	Global Change Biology	280	0.276172
13	Science Of The Total Environment	278	0.29162
14	Landscape Ecology	276	0.306957
15	Landscape And Urban Planning	216	0.31896
16	Ecological Modelling	196	0.329851
17	Science	196	0.340742
18	Agriculture Ecosystems And Environment	191	0.351356
19	Diversity And Distributions	191	0.361969
20	Nature	188	0.372416
21	Oecologia	176	0.382196
22	Environmental Management	169	0.391587
23	Ecology Letters	166	0.400811
24	Journal Of Environmental Management	164	0.409924
25	Journal Of Animal Ecology	153	0.418426
26	Journal Of Biogeography	146	0.426539
27	Biological Invasions	141	0.434374
28	Journal Of Ecology	133	0.441765
29	Environmental Monitoring And Assessment	130	0.448989
30	Scientific Reports	129	0.456157
31	Journal Of Theoretical Biology	127	0.463214
32	Ecography	125	0.47016
33	Global Ecology And Biogeography	121	0.476884
34	Austral Ecology	116	0.48333
35	American Naturalist	115	0.48972
36	Aquatic Conservation Marine And Freshwater Ecosystems	111	0.495888
37	Shengtai Xuebao Acta Ecologica Sinica	99	0.501389
38	Sustainability	99	0.50689
39	Hydrobiologia	88	0.51178
40	Journal Of Insect Conservation	88	0.51667
41	Oikos	88	0.52156
42	Ecological Engineering	87	0.526395
43	ORYX	87	0.531229
44	Philosophical Transactions Of The Royal Society B Biological Sciences	86	0.536008
45	Forests	84	0.540676
46	Peerj	84	0.545343
47	Shengtai Xuebao Acta Ecologica Sinica	79	0.549733
48	Marine Ecology Progress Series	78	0.554068
49	Conservation Genetics	72	0.558068
50	Animal Conservation	71	0.562014
51	Marine Pollution Bulletin	71	0.565959
52	Biology Letters	67	0.569682
53	Biotropica	65	0.573294
54	Environmental Conservation	63	0.576795
55	Palaeogeography Palaeoclimatology Palaeoecology	63	0.580296
56	Evolution	62	0.583741
57	Journal For Nature Conservation	60	0.587075
58	Ambio	58	0.590298
59	Ecology And Society	57	0.593465
60	Ecology And Evolution	56	0.596577
61	Journal Of Wildlife Management	56	0.599689
62	Chinese Journal Of Applied Ecology	55	0.602745
63	Wildlife Research	55	0.605801
64	Pacific Conservation Biology	53	0.608746
65	Ecological Research	52	0.611636
66	Science Advances	51	0.61447
67	Urban Forestry And Urban Greening	51	0.617304
68	Environmental Research Letters	50	0.620082
69	Journal Of Vegetation Science	50	0.622861
70	Ecological Economics	49	0.625583
71	Restoration Ecology	49	0.628306
72	Canadian Journal Of Forest Research	48	0.630974
73	BMC Evolutionary Biology	47	0.633585
74	Environmental Science And Policy	47	0.636197
75	American Journal Of Primatology	45	0.638697
76	Journal Of Mammalogy	45	0.641198
77	Ecosystems	44	0.643643
78	New Phytologist	44	0.646088
79	Ecological Management And Restoration	43	0.648477
80	Remote Sensing	42	0.650811
81	American Journal Of Botany	41	0.65309
82	Environmental Science And Technology	41	0.655368
83	Functional Ecology	40	0.657591
84	Mathematical Biosciences	40	0.659813
85	Paleobiology	40	0.662036
86	Environmental Entomology	39	0.664203
87	Environmental Pollution	39	0.66637
88	Marine Environmental Research	39	0.668537
89	Remote Sensing Of Environment	39	0.670705
90	Ecological Informatics	38	0.672816
91	Ecosphere	38	0.674928
92	Journal Of Great Lakes Research	38	0.677039
93	Journal Of Mathematical Biology	37	0.679095
94	Molecular Ecology	37	0.681151
95	New Zealand Journal Of Ecology	37	0.683207
96	Ocean And Coastal Management	37	0.685263
97	Quaternary Science Reviews	37	0.687319
98	Soil Biology And Biochemistry	37	0.689375
99	Diversity	36	0.691376
100	Natural Areas Journal	35	0.693321
101	Plos Biology	35	0.695266
102	Climatic Change	34	0.697155
103	Acta Oecologica	33	0.698989
104	Land Use Policy	33	0.700822
105	Applied And Environmental Microbiology	32	0.702601
106	Isme Journal	32	0.704379
107	Theoretical Population Biology	32	0.706157
108	Biological Reviews	31	0.70788
109	Bird Conservation International	31	0.709602
110	Current Biology	31	0.711325
111	Ibis	31	0.713047
112	Journal Of Arid Environments	31	0.71477
113	Marine And Freshwater Research	31	0.716493
114	Plant Ecology	31	0.718215
115	Global And Planetary Change	30	0.719882
116	African Journal Of Ecology	29	0.721494
117	Ecological Monographs	29	0.723105
118	Global Environmental Change	29	0.724717
119	Population Ecology	29	0.726328
120	Ecological Entomology	28	0.727884
121	Environmental Toxicology And Chemistry	28	0.72944
122	Estuarine Coastal And Shelf Science	28	0.730996
123	Frontiers In Ecology And The Environment	28	0.732552
124	Journal Of Evolutionary Biology	27	0.734052
125	Water Switzerland	27	0.735552
126	Agroforestry Systems	26	0.736997
127	Basic And Applied Ecology	26	0.738442
128	Tropical Ecology	26	0.739887
129	Canadian Journal Of Zoology	25	0.741276
130	Landscape Research	25	0.742665
131	Comptes Rendus Biologies	24	0.743999
132	International Journal Of Primatology	24	0.745332
133	Journal Of Zoology	24	0.746666
134	Naturschutz Und Landschaftsplanung	24	0.748
135	Rangeland Ecology And Management	24	0.749333
136	Transactions Of The American Fisheries Society	24	0.750667
137	Wetlands	24	0.752
138	Annals Of Botany	23	0.753279
139	Bulletin Of Mathematical Biology	23	0.754557
140	Environmental Biology Of Fishes	23	0.755835
141	Environmental Science And Pollution Research	23	0.757113
142	Journal Of Ornithology	23	0.758391
143	Geology	22	0.759613
144	ICES Journal Of Marine Science	22	0.760836
145	Coral Reefs	21	0.762003
146	Journal Of Experimental Marine Biology And Ecology	21	0.76317
147	Biological Journal Of The Linnean Society	20	0.764281
148	Emu	20	0.765392
149	Land Degradation And Development	20	0.766504
150	Australian Zoologist	19	0.767559
151	Ekologia Bratislava	19	0.768615
152	Endangered Species Research	19	0.769671
153	Forestry Chronicle	19	0.770727
154	International Journal Of Environmental Research And Public Health	19	0.771783
155	Canadian Journal Of Fisheries And Aquatic Sciences	18	0.772783
156	Gcb Bioenergy	18	0.773783
157	International Journal Of Biodiversity Science Ecosystem Services And Management	18	0.774783
158	Journal Of Cleaner Production	18	0.775784
